1 Ki-67 contributes to normal cell cycle progression and inactive X heterochromatin in p21  
2 checkpoint-proficient human cells  
3  
4 Xiaoming Sun<sup>1</sup>, Aizhan Bizhanova<sup>1</sup>, Timothy D. Matheson<sup>1</sup>, Jun Yu<sup>1</sup>, Julie L. Zhu<sup>1,2,3</sup>, Paul D.  
5 Kaufman<sup>1,3,#</sup>

6

7 <sup>1</sup>Department of Molecular, Cell and Cancer Biology  
8 University of Massachusetts Medical School, Worcester, MA 01605, USA

9

10 <sup>2</sup>Program in Bioinformatics and Integrative Biology  
11 University of Massachusetts Medical School, Worcester, MA 01605, USA.

12

13 <sup>3</sup>Program in Molecular Medicine  
14 University of Massachusetts Medical School, Worcester, MA 01605, USA.

15

16

17 Running title: Ki-67 affects S phase entry and Xi heterochromatin

18

19 #Corresponding Author ([paul.kaufman1@umassmed.edu](mailto:paul.kaufman1@umassmed.edu))

20

21 Word count for Abstract: 197

22 Word count for the Materials and Methods section: 2437

23

24 Combined word count for the Introduction, Results, and Discussion: 4809

25

26

## 27 **Abstract**

28 Ki-67 protein is widely used as a tumor proliferation marker. However, whether Ki-67  
29 affects cell cycle progression has been controversial. Here, we demonstrate that depletion  
30 of Ki-67 in human hTERT-RPE1, WI-38, IMR90, hTERT-BJ cell lines and primary fibroblast  
31 cells slowed entry into S phase and coordinately downregulated genes related to DNA  
32 replication. Some gene expression changes were partially relieved in Ki-67-depleted  
33 hTERT-RPE1 cells by co-depletion of the Rb checkpoint protein, but more thorough  
34 suppression of the transcriptional and cell cycle defects was observed upon depletion of  
35 cell cycle inhibitor p21. Notably, induction of p21 upon depletion of Ki-67 was a consistent  
36 hallmark of cell types in which transcription and cell cycle distribution were sensitive to Ki-  
37 67; these responses were absent in cells that did not induce p21. Furthermore, upon Ki-67  
38 depletion, a subset of inactive X (Xi) chromosomes in female hTERT-RPE1 cells displayed  
39 several features of compromised heterochromatin maintenance, including decreased  
40 H3K27me3 and H4K20me1 labeling. These chromatin alterations were limited to Xi  
41 chromosomes localized away from the nuclear lamina and were not observed in  
42 checkpoint-deficient 293T cells. Altogether, our results indicate that Ki-67 integrates  
43 normal S phase progression and Xi heterochromatin maintenance in p21 checkpoint-  
44 proficient human cells.

45

## 46 **INTRODUCTION**

47 Ki-67 was first identified via an antibody raised against Hodgkin lymphoma cell  
48 nuclei (1). Because Ki-67 is generally expressed strongly in proliferating cells and poorly in  
49 quiescent cells (2), anti-Ki-67 antibodies are frequently used to detect proliferative cells in

50 clinical studies (3,4). In interphase cells, Ki-67 primarily localizes to the nucleolus (5-7),  
51 whereas during mitosis, it coats the chromosomes (8-10). In the past few years, several  
52 studies have greatly increased our understanding of Ki-67 function. This is particularly true  
53 for its mitotic roles. Specifically, Ki-67 is required for formation of the mitotic  
54 perichromosomal layer (11,12), a proteinaceous sheath that coats mitotic chromosomes  
55 (13,14). As part of this layer, Ki-67's large size and highly positively-charged amino acid  
56 composition keeps individual mitotic chromosomes dispersed rather than aggregated upon  
57 nuclear envelope disassembly, thereby ensuring normal kinetics of anaphase progression  
58 (15). At anaphase onset, Ki-67 binds protein phosphatase 1 $\gamma$  (PP1 $\gamma$ ) to form a holoenzyme  
59 (16) important for targeting substrates that must be dephosphorylated during mitotic exit  
60 (10). In contrast to its structural role on the mitotic chromosomal surface, Ki-67 does not  
61 appear to affect nucleosomal spacing (15) or condensation of individual mitotic  
62 chromosomes (11,15).

63 In addition to its expression in proliferating cells, other experiments suggested Ki-  
64 67 has a positive role in regulating cell proliferation. In early studies, antisense  
65 oligonucleotides targeting Ki-67 expression in human IM-9 multiple myeloma cells blocked  
66 [<sup>3</sup>H]-thymidine incorporation, indicative of inhibition of proliferation (17). Likewise, Ki-67-  
67 targeted phosphorothioate anti-sense oligonucleotides that resulted in partial depletion of  
68 Ki-67 protein inhibited proliferation of human RT-4 bladder carcinoma and other tumor  
69 cell lines (18). More recently, siRNA-mediated depletion of Ki-67 resulted in reduced  
70 proliferation in human 786-0 renal carcinoma cells (19).

71 However, despite its utility as a proliferation marker, the contribution of Ki-67 to  
72 cell proliferation has recently been questioned. For example, in one recent study, genetic

73 disruption of Ki-67 in human MCF-10A epithelial breast and DLD-1 colon cancer cells did  
74 not affect cell proliferation rates in bulk culture, although clonogenic growth of highly  
75 diluted cell populations was reduced (20). In another recent study, depletion of Ki-67 in  
76 human HeLa or U2OS cells did not alter cell cycle distribution (12). These data raise the  
77 possibility that Ki-67 function may have different consequences in different cell types.

78 In our previous studies we demonstrated that the interphase and mitotic  
79 localization of Ki-67 is partially dispersed in cells lacking the N-terminal domain of the  
80 p150 subunit of Chromatin Assembly Factor-1 (21, 22). We therefore began exploring the  
81 functions of Ki-67 in several human cell types. Here, we show that the contribution of Ki-67  
82 to cell proliferation depends on cell type. In hTERT-RPE1, WI-38, IMR90, and hTERT-BJ  
83 cells and primary foreskin fibroblasts, depletion of Ki-67 resulted in reduced frequencies of  
84 S-phase cells and concomitant reduction in S phase-related transcript levels. We show that  
85 in female hTERT-RPE1 cells, these phenotypes required a p21 checkpoint-mediated delay  
86 in S phase entry, and are accompanied by altered nucleolar association and chromatin  
87 characteristics of the inactive X (Xi) chromosome. Notably, none of these phenotypes were  
88 observed in human cells unable to induce p21 in response to Ki-67 depletion. Therefore, Ki-  
89 67 is important for normal S phase progression in p21 checkpoint-proficient human cells,  
90 in a manner correlated with its contribution to Xi heterochromatin composition.

91

## 92 RESULTS

### 93 **Ki-67 affects S phase gene expression and progression**

94 To explore how Ki-67 impacts gene expression, we performed RNAseq analyses of  
95 control and Ki-67-depleted hTERT-RPE1 cells, a diploid retinal pigment epithelial cell line

96 immortalized by an hTERT transgene (23). Duplicate analyses were highly reproducible  
97 (Figures 1A-B). Ki-67 depletion resulted in approximately equal numbers of reduced and  
98 increased RNA levels across the transcriptome (Figure 1C). However, Reactome pathway  
99 analysis of RNA abundance changes showed that the most altered functional sets of genes  
100 included those involved in DNA replication and cell cycle progression (Figure 1D). For  
101 example, levels of RNAs encoding all subunits of several protein complexes involved in S  
102 phase progression were concertedly reduced, including DNA replication clamp loader RFC  
103 (RFC1-5 genes), ssDNA-binding complex RPA (RPA1-3), the replicative helicase (MCM1-6),  
104 the GINS replication initiation complex (GINS1-4), the DNA polymerase alpha/primase  
105 complex, as well as the DNA replication clamp PCNA and the flap-endonuclease FEN1  
106 involved in Okazaki fragment maturation (Supplemental Tables 1-2). We confirmed  
107 reduced levels of a subset of replication-related RNA targets by RT-qPCR analyses (Figures  
108 1E-F). Notably, the RT-qPCR data were very similar when obtained with two distinct Ki-67  
109 depletion reagents, one a synthetic siRNA and the other a cocktail of in vitro-diced dsRNAs  
110 non-overlapping the siRNA target, both of which efficiently depleted steady-state Ki67  
111 levels (Figures 1M-N).

112 We also observed that fluorescence-activated cell sorting (FACS) analysis of Br-  
113 dUTP-labeled cells showed that the proportion of S phase cells decreased upon depletion of  
114 Ki-67 in hTERT-RPE1 cells with either depletion reagent (Figure 1G-H; quantified in Fig. 1I  
115 and 1K). In contrast, proportions of G1 and G2/M populations were not significantly  
116 altered (Fig. 1J and 1L). Therefore, Ki-67 is important for normal S phase distribution and  
117 gene expression in hTERT-RPE1 cells.

118 As an additional control for the direct effect of the siRNA treatment, we used  
119 CRISPR/Cas9 to mutate the siRNA target site in hTERT-RPE1 cells (Fig. 2A-B). In a resulting  
120 homozygous mutant cell line (Figure 2C), siKi-67 no longer depleted Ki-67 protein levels,  
121 but as expected the esiKi-67 reagent was still effective (Figure 2D). We also observed that  
122 siKi-67 no longer altered candidate S phase RNA levels in the resistant cell line, but esiKi-  
123 67 did (Figure 2E). We conclude that the transcriptional response to acute depletion of the  
124 Ki-67 mRNA is due to loss of Ki-67 protein.

125 However, recent studies challenge the view that Ki-67 is important for human cell  
126 proliferation; for example, depletion of Ki-67 had minimal effects on the cell cycle  
127 distribution of tumor-derived HeLa or U2OS cells (12). Because our data indicated that Ki-  
128 67 contributes to normal cell cycle progression in hTERT-RPE1 cells, we hypothesized that  
129 the contribution of Ki-67 to cell cycle progression would be cell type-dependent, and may  
130 be related to checkpoint function. To explore this idea, we depleted Ki-67 in several  
131 additional cell lines. We compared diploid, non-immortal WI-38 and IMR90 fibroblasts,  
132 hTERT-immortalized BJ fibroblasts, and primary human foreskin fibroblasts (HFFs) with  
133 tumor-derived cell lines: virally-transformed kidney (293T) or cervical carcinoma (HeLa)  
134 cells, and osteosarcoma U2OS cells. Importantly, we confirmed that all these cells could be  
135 efficiently depleted of Ki-67 protein using both of our depletion reagents (Figure 2F-L).

136 In all of the experiments with the non-tumor-derived cells, we observed reduced  
137 replication factor RNA levels and fewer cells in S phase, similar to our results in hTERT-  
138 RPE1 cells, and these results were independent of which Ki-67 depletion reagent was used  
139 (Figures 3-4). In contrast, in the tumor-derived cell lines, Ki-67 depletion did not result in  
140 uniform down regulation of the S phase genes tested, nor were there changes in cell cycle

141 distribution (Figures 5-6). These data are consistent with RNAseq data sets in HeLa and  
142 U2OS cells (12) that did not display concerted downregulation of DNA replication genes.  
143 We conclude that the effects of Ki-67 depletion on RNA levels and cell cycle distribution are  
144 cell type-dependent.

145       The FACS analyses of asynchronous cell populations indicated that Ki-67 depletion  
146 most significantly affects S phase in the sensitive cell types. To examine this in more detail,  
147 we analyzed the kinetics of DNA synthesis in synchronized hTERT-RPE1 cells. Cells were  
148 blocked near the G1-S transition of the cell cycle with hydroxyurea (HU) for 15 hours  
149 (Figure 7A) (24), which provided efficient arrest (Fig. 7D). Cells were then released into  
150 drug-free media and pulse-labeled with the deoxynucleotide analog EdU at two-hour  
151 timepoints across an 8-10-hour time course. In control cells treated with the scrambled  
152 siRNA, EdU labeling was first detected at the 2 hour time point, and displayed a typical  
153 early S phase pattern consisting of many small foci (25). At later time points, the pulse of  
154 EdU labeled larger foci, indicative of mid-late S phase patterns. Upon Ki-67 depletion, we  
155 observed a delay in the initial detection of EdU incorporation of approximately 2 hours  
156 (Figure 7B). Notably, the Ki-67-depleted population also displayed a higher percentage of  
157 cells that did not incorporate EdU during the time course (Figure 7C). Together, these data  
158 are consistent with our transcriptomic and FACS data indicating that Ki-67 depletion  
159 affects S-phase in hTERT-RPE-1 cells (Figure 1).

160

### 161 **Checkpoint responses to Ki-67 depletion**

162       Because Ki-67 depletion did not affect S phase transcription or cell cycle  
163 progression in tumor-derived cell lines, our data suggested that functional checkpoints are

164 required for sensitivity to Ki-67 depletion. Consistent with this idea were comparisons of  
165 our RNAseq data with metadata analyses of genes regulated by cell cycle status or by E2F  
166 transcription factors (26) that are important for G1/S cell cycle phase transcription (26-  
167 28). These meta-analyses aggregated multiple datasets, finding that similar results in  
168 multiple datasets strongly predicted regulatory network connections that could be missed  
169 in single experiments. Of the cell cycle-regulated genes identified in that study, we find  
170 those that peak during G1/S phase were more frequently downregulated than upregulated  
171 upon Ki-67 depletion (Fig. 8A; Supplemental Table 3). Consistent with this observation,  
172 E2F target RNA levels (Fig. 8B) were much more frequently downregulated than  
173 upregulated upon Ki-67 depletion. These comparisons were consistent with the idea that  
174 checkpoint activation contributed to the observed delay in S phase entry and  
175 transcriptional phenotypes in Ki-67-depleted cells.

176 To test this, we performed experiments co-depleting checkpoint proteins. First, we  
177 took advantage of a derivative of hTERT-RPE1 cells that have an integrated, doxycycline-  
178 inducible shRNA that targets the RB mRNA (29). Rb levels remained unchanged in these  
179 cells in the absence of doxycycline (Fig. 8C), and siRNA-mediated depletion of Ki-67  
180 resulted in reduced S phase-related RNA levels as was observed previously (Fig. 8D).  
181 Addition of doxycycline to deplete Rb, together with a control scrambled siRNA leaving Ki-  
182 67 levels unchanged, did not significantly alter S-phase related target RNA levels (Fig. 8D).  
183 In contrast, simultaneous depletion of Rb and Ki-67 resulted in RNA levels at two of the  
184 four loci tested that were significantly elevated compared to those in cells depleted of Ki-67  
185 alone (Fig. 8D). FACS analysis indicated that Rb depletion was insufficient to significantly



186 change the cell cycle profile of Ki-67-depleted cells (Fig. 8E-F). We conclude that depletion  
187 of Rb only partially relieves the cellular response to Ki-67 depletion in hTERT-RPE1 cells.

188 Therefore, we reasoned other factors must contribute. One clue was provided by  
189 comparison of the si-Ki-67 RNAseq data to metadata analysis of binding by subunits of the  
190 transcription repressor complex termed DREAM (26). We observed that genes with the  
191 highest predicted probability of DREAM binding were very frequently downregulated upon  
192 Ki-67 depletion (Fig. 8G). In mammalian cells, DREAM is a master regulator of cell cycle-  
193 dependent gene expression, repressing both G1/S and G2/M targets, and gene repression  
194 by DREAM requires the p21 checkpoint protein (27,30,31). p21 is a potent universal CDK  
195 inhibitor (CKI). During G1 and S phases, p21 directly binds to and inhibits the kinase  
196 activity of cyclin E-CDK2, cyclin B1-CDK1 and cyclin D-CDK4/6 complexes (32-34).  
197 Furthermore, p21 also directly inhibits DNA synthesis by binding to PCNA, the sliding  
198 clamp required for processive DNA polymerase activity (35). Therefore we hypothesized  
199 that p21 could be important for the response to Ki-67 depletion (Figure 8H).

200 Consequently, we next tested effects of Ki-67 depletion the *CDKN1A* gene, which  
201 encodes p21. Our RNAseq data indicated increased *CDKN1A* RNA levels in Ki-67 depleted  
202 hTERT-RPE1 cells (log2 fold change = +0.48, p = 0.016), although multiple hypothesis  
203 testing indicated that these values did not achieve the stringent statistical significance  
204 cutoff of  $q < 0.05$  (Supplemental Table 2). RT-PCR measurements of *CDKN1A* RNA levels  
205 demonstrated a significant increase in four diploid cell types, but not in 293T cells (Fig.  
206 9A). We note that induction of *CDKN1A* RNA was dependent on having an intact siRNA  
207 target site in the Ki-67 gene, indicating this is a direct effect of Ki-67 depletion (Figure 2E).

208 Consistent with the increased RNA levels, we detected elevated p21 protein levels in  
209 hTERT-RPE1 but not 293T cells (Fig. 9B).

210 p21 is a direct target of transcriptional induction by the tumor suppressor p53, and  
211 the cell lines examined thus far therefore implicated active p53 in the sensitivity to Ki-67  
212 (36,37). To examine this relationship further, we compared the effects of Ki-67 depletion in  
213 additional cancer cell lines, including two expressing wild-type p53, MCF7 and HCT116,  
214 and also MDA-MB-231 cells which express a mutant p53 defective for p21 induction (38).  
215 In MCF7 breast adenocarcinoma cells, we observed that Ki-67 depletion elevated p21 RNA  
216 and protein levels (Fig. 9 G,H), and down-regulated replication-related RNAs (Fig. 9H). In  
217 contrast, in HCT116 colorectal carcinoma and MDA-MB-231 breast adenocarcinoma cells,  
218 Ki-67 depletion did not increase p21 expression or cause concerted down-regulation of S  
219 phase genes (Fig. 9G, I, J). Because HCT116 and MDA\_MB-231 cells differ in their p53  
220 status, we conclude that p53 status cannot always predict the response to Ki-67 depletion.  
221 Instead, we find that induction of p21 upon Ki-67 depletion is a consistent hallmark of this  
222 form of checkpoint activation.

223 To assess the functional consequence of p21 induction, we performed co-depletion  
224 experiments in hTERT-RPE1 cells (Fig. 9D). We observed that cells simultaneously  
225 depleted of both Ki-67 and p21 no longer displayed the reduced levels of any of the four S  
226 phase-related mRNAs analyzed (Fig. 9D). Furthermore, FACS analysis of the co-depleted  
227 cells showed that there was significant restoration of the percentage of cells in S phase  
228 upon codepletion of p21 with Ki-67 (Fig. 9E-F). We conclude that induction of p21 is  
229 functionally important for the effects of Ki-67 depletion on cell cycle distribution in hTERT-  
230 RPE1 cells.

## 231 **Ki-67 affects heterochromatic characteristics of the inactive X chromosome**

232           Ki-67 is required for the normal cellular localization of heterochromatin-associated  
233 histone modifications (12), and for the interphase nucleolar association of heterochromatic  
234 loci(22). Because the inactive X (Xi) chromosome is a well-studied example of facultative  
235 heterochromatin that associates with the nucleoli of female mouse (24) and human cells  
236 (39-41), we tested whether Ki-67 affected characteristics of Xi heterochromatin. Indeed, Ki-  
237 67 depletion in hTERT-RPE1 cells resulted in a subset of cells that displayed reduced  
238 staining intensity for antibodies recognizing H3K27me3 and H4K20me1, histone  
239 modifications that are enriched on the Xi (42,43)(Figure 10A, C, E, G). H3K27me3 is  
240 generated by the Polycomb PRC2 complex and is a keystone of facultative heterochromatic  
241 silencing (44-46). H4K20me1 is generated by the PR-Set7/Set8/KMT5a enzyme (47) and  
242 together with H3K27me3 is an early mark on Xi chromosomes during the process of XIST-  
243 mediated inactivation (43,47). Notably, changes to either of these histone modifications  
244 were only observed in cells in which the Xi was localized away from the nuclear periphery  
245 (Fig. 10B, D, F, H). Furthermore, these changes were not observed in 293T cells that also  
246 lacked the cell cycle response to Ki-67 depletion (Fig. 11). Therefore, the response of  
247 hTERT-RPE1 cells to Ki-67 depletion involves two classes of correlated events that are both  
248 absent in 293T cells: checkpoint-mediated perturbation of S phase, and altered Xi  
249 heterochromatin.

250           Increased levels of repetitive element-rich Cot-1-hybridizing transcripts and RNA  
251 polymerase II have previously been observed in breast cancer cell lines that display  
252 perturbations in Xi chromatin (48). We tested for changes in these properties as well, and  
253 we detected an increase in the frequency of cells that display Cot-1-hybridizing transcripts

254 or RNA polymerase II on the Xi upon Ki-67 depletion in hTERT-RPE1 cells (Figures 12-13).  
255 As observed above for the histone modifications (Fig. 10), increased levels of Cot-1 RNA  
256 and Pol II within the XIST domain were only observed in cells in which the Xi was localized  
257 away from the nuclear periphery. Also, as for all other phenotypes detected, these changes  
258 were similar with either Ki-67 depletion reagents (Figs. 12-13).

259         However, not all aspects of Xi heterochromatin were sensitive to Ki-67 depletion.  
260 For example, Ki-67 depletion did not alter the overall appearance of the XIST “cloud” that  
261 covers the Xi (Fig. 14A). In addition, RT-PCR showed no significant down regulation of  
262 XIST transcript expression (Fig. 10J). Also, there was no evidence for Xi chromosome-wide  
263 depression of transcription, as shown in the analysis of X-linked gene expression (Fig.  
264 14B), or in the analysis of allele-specific transcription of X-linked genes detected via  
265 analysis of known SNPs (Supplemental Table 4). Furthermore, an additional mark  
266 associated with the Xi, the histone variant macroH2A, did not change in appearance upon  
267 depletion of Ki-67 (Fig. 14C-H). Together, the Xi data indicate that acute depletion of Ki-67  
268 alters several, but not all, characteristics of Xi heterochromatin in hTERT-RPE1 cells.  
269 Importantly, changes in H3K27me3 and H4K20me1 staining were not observed in 293T  
270 cells, indicating a correlation between checkpoint activation and effects on the Xi upon Ki-  
271 67 depletion.

272

### 273 **Ki-67 affects the S phase nucleolar association of the inactive X chromosome**

274         The perinucleolar space is a subset of the heterochromatic compartment; another  
275 frequent location for heterochromatin is at the nuclear periphery, adjacent to the nuclear  
276 lamina (49). Accordingly, the Xi is usually localized to one of these two preferred locations

277 (24). However, heterochromatic sequences can dynamically relocalize from nucleoli to the  
278 periphery, either during cell division or upon perturbing the nucleolus with actinomycin  
279 (49-52). Because Ki-67 depletion affected heterochromatic marks only on Xi chromosomes  
280 away from the nuclear periphery (Figs. 10-13), we hypothesized that it might also affect the  
281 interphase localization of the Xi. We first examined Xi localization in asynchronous hTERT-  
282 RPE1 cells, using immuno-RNA-FISH to detect Xi-associated lncRNA XIST and nucleolar  
283 protein fibrillarin. Indeed, Ki-67 depletion resulted in a partial but statistically significant  
284 reduction in Xi-nucleolar associations (Figure 15A-D). This loss of nucleolar association  
285 was accompanied by an increase of similar magnitude in Xi-lamina associations, and  
286 similar results were observed with our two distinct Ki-67 depletion reagents (Figures 15B,  
287 D). However, in 293T cells, we observed no significant alteration in Xi-nucleolar  
288 associations (Fig. 15E-H). Thus, distribution of the Xi within the interphase nucleus is  
289 sensitive to Ki-67 depletion in a cell type that induces p21.

290 Previous studies in mouse cells showed that the Xi-nucleolar association is cell-cycle  
291 regulated, occurring most prevalently in S phase cells (24). Therefore, we examined Xi  
292 localization in hTERT-RPE1 cells prepared in the same manner as in the cell  
293 synchronization experiments in Figure 7A-B. Consistent with published data from mouse  
294 cells (24), the frequency of Xi-nucleolar associations peaked in middle S-late S phase  
295 transition; this was true for the frequency of Xi associations that were exclusively at the  
296 nucleolus (Fig. 15I), and for the frequency of Xi chromosomes simultaneously associated  
297 with both the nucleolus and the lamina (Fig. 15J). These peaks occurred in both the control  
298 and Ki-67-depleted populations, with the Xi-nucleolar interaction peaks delayed two hours

299 in the latter case. The two-hour shift correlates with the delay in S phase entry in the Ki-67-  
300 depleted cells (Fig. 7).

301 As suggested by the Xi localization data from asynchronous cells (Fig. 15A-D), Xi  
302 associations with the nucleoli and lamina were inversely related, so that the peak of  
303 nucleolar associations (Figure 15I-J) coincided with the lowest frequencies of laminar  
304 associations (Fig. 15K). We note that when the total Xi-laminar association frequencies  
305 were counted by summing the exclusively laminar associations (Fig. 15K) plus those also  
306 associated with nucleoli simultaneously (Fig. 15J), we observed little change during the  
307 experiment (Figure 15L). Thus, the biggest changes during S phase are lamina-associated Xi  
308 becoming transiently also associated with nucleoli (e.g. compare Fig. 15J and 15K).  
309 Together, these data indicated that cell cycle-regulated Xi-nucleolar associations are  
310 delayed in concert with DNA synthesis upon depletion of Ki-67 in hTERT-RPE1 cells. Thus,  
311 checkpoint activation upon Ki-67 depletion affects cell cycle progression and gene  
312 expression, and these effects are correlated with altered Xi heterochromatin in female  
313 hTERT-RPE1 cells.

314

## 315 **Discussion**

316

### 317 **Cell-type specific responses to Ki-67 depletion**

318 Our studies show that Ki-67 expression is important for normal S phase progression  
319 in primary human foreskin fibroblasts, non-transformed fibroblast lines (WI-38 and  
320 IMR90), hTERT-immortalized BJ fibroblasts, and hTERT-immortalized RPE1 cells (23), a  
321 human female retinal pigment epithelial cell line with a diploid karyotype (53). In contrast,  
322 in cancer-derived 293T, U2OS and HeLa cells, depletion of Ki-67 did not cause defects in

323 cell proliferation. Therefore, we conclude that Ki-67 is required for normal cell cycle  
324 progression in some but not all cell lines. Our data distinguish two types of responses to  
325 depletion of Ki-67 in human cells, depending on whether cells are able to mount a p21-  
326 dependent checkpoint.

327 hTERT-BJ fibroblasts were sensitive to Ki-67 depletion in our assays; however, a  
328 previous study indicated that shRNA-mediated Ki-67 depletion did not affect hTERT-BJ cell  
329 cycle re-entry after starvation (12). Therefore, not all assays can detect the effects of Ki-67  
330 depletion. For example, two assays used in the previous study are insensitive to the cell  
331 cycle progression delays that we observe upon Ki-67 depletion. First, one-dimensional flow  
332 cytometry of propidium iodide-stained asynchronous populations cannot detect the S  
333 phase delays we detect in BrdU labeling experiments; second, a 3 hour EdU pulse is too  
334 long to capture the 2-hour S phase entry delay. Together, our data indicate that the effects  
335 of Ki-67 on S phase progression are transient in sensitive cell types and therefore most  
336 easily observed using short pulses of labeled deoxynucleotides.

337

### 338 **Characteristics of checkpoint activation caused by Ki-67 depletion**

339 Meta-analyses of our RNAseq data showed that Ki-67 depletion in hTERT-RPE1 cells  
340 resulted in frequent repression of Rb/E2F-regulated, G1/S expressed genes. However,  
341 depletion of the Rb checkpoint protein only partially relieved transcriptional repression  
342 and did not restore normal percentages of S phase cells, indicating that additional factors  
343 were responsible for the altered cell cycle profile in Ki-67 depleted cells.

344 A strong candidate for such a factor is the DREAM complex, which represses G1/S-  
345 expressed cell cycle genes in a p21-dependent manner (26, 54). We noticed frequent

346 downregulation of DREAM complex targets in Ki-67-depleted cells, which lead us to test  
347 whether sensitivity to Ki-67 depletion was also p21-dependent. Notably, both the  
348 transcriptional alterations and cell cycle perturbations caused by Ki-67 depletion were  
349 partially relieved by simultaneous depletion of p21. Importantly, cell lines that induce p21  
350 upon Ki-67 depletion are those that inhibit transcription of DNA replication genes and  
351 delay entry into S-phase. Thus, this study implicates a p21-dependent checkpoint in cells  
352 sensitive to Ki-67 depletion.

353         A recent study shows that PD0332991, a small molecule CDK4/CDK6 inhibitor  
354 (CDKi), depletes Ki-67 protein levels in some but not all cell lines (55). In “CDKi-sensitive”  
355 cells, this compound causes G1 cell cycle arrest via an Rb-mediated checkpoint, inhibiting  
356 Ki-67 and cyclin A gene transcription while proteasome-mediated degradation destroys  
357 existing Ki-67 protein molecules. CDKi-sensitivity appears similar to many of the responses  
358 we observe upon Ki-67 depletion, and CDKi-sensitive cells include IMR90 and primary  
359 fibroblasts that we found to be “Ki-67 sensitive”. MCF7 breast adenocarcinoma cells are  
360 also CDKi-sensitive (55), and we find that upon Ki-67 depletion MCF7 cells induce p21 and  
361 down-regulate DNA replication genes. In contrast, HeLa and U2OS cells are not sensitive to  
362 either CDKi or Ki-67 depletion. Thus, depletion of Ki-67 via CDKi treatment (55) or via  
363 siRNA (this work) often leads to similar outcomes.

364         However, there is a counterexample to these correlations. CDKi treatment blocks S  
365 phase entry and depletes Ki-67 in MDA-MB-231 breast adenocarcinoma cells (55). In  
366 contrast, upon Ki-67 depletion, MDA-MB-231 cells did not display either p21 induction or  
367 transcriptional down-regulation of S phase genes. Therefore, proteasome-mediated  
368 degradation of Ki-67 via CDK4/6 inhibition is not equivalent to siRNA-mediated Ki67



369 depletion in all cell types. We hypothesize that a key difference is related to induction of  
370 p21 in “Ki-67-sensitive” cell lines. p21 contributes to G1/S arrest via multiple mechanisms.  
371 As a CDK inhibitor (32,33), p21 blocks CDK-mediated Rb phosphorylation thereby  
372 inhibiting E2F-driven transcription(56). Likewise, it maintains activity of the  
373 transcriptionally repressive DREAM complex which contain Rb-related p107/p130 “pocket  
374 protein” subunits (26,27,54). p21 also directly interacts with PCNA and directly inhibits  
375 DNA synthesis (35). Therefore, the lack of p21 induction in MDA-MD-231 cells may be the  
376 key factor explaining the lack of “Ki-67 sensitivity” in this cell line. Future experiments will  
377 be required to determine whether the activation of the DREAM complex or direct inhibition  
378 of DNA synthesis machinery is more important for the “Ki-67-sensitive” phenotype  
379 associated with p21 induction.

380         Regarding the defect in p21 induction in MDA-MB-231 cells, we note that they  
381 express a gain-of-function R280K allele, which dominantly blocks p21 induction (38). Thus,  
382 p53 status is likely a critical aspect of the different cell cycle responses to Ki-67 depletion in  
383 many cell lines. However, sensitivity to Ki-67 depletion cannot always be predicted strictly  
384 by p53 status. For example, HCT116 cells express wild-type p53 (38) but are not sensitive  
385 to the CDKi PD0332991 (55), or to Ki-67 depletion (Fig. 9J). Because Ki-67 expression  
386 predicts the differential response of different cell lines to CDKi treatment during xenograft  
387 tumor formation (55), understanding how different checkpoint mutations alter Ki-67  
388 expression and sensitivity to its depletion are important goals for developing stratified  
389 approaches to cancer therapies.

390

391 **Ki-67 contributes to the interphase localization of the Xi chromosome**

392 Nucleoli are non-membrane bound organelles within the nucleus. Not only are these  
393 sites of synthesis and assembly of ribosome components, the periphery of these organelles  
394 plays an important role in higher order chromosome localization (49,57). Specifically, the  
395 nucleolar periphery houses a subset of the cellular heterochromatin, which exchanges  
396 dynamically with lamina-associated heterochromatin (50-52). Like other heterochromatin  
397 regions, high resolution analysis of nucleolus-associated domains (termed NADs) in human  
398 cells reveals enrichment of satellite repetitive DNAs and repressive histone marks  
399 (51,58,59). Major questions in chromosome biology are how heterochromatin regions are  
400 partitioned to different intranuclear locations, and how these interactions are governed by  
401 cell cycle progression.

402 As a region of facultative heterochromatin, the Xi chromosome in female cells is  
403 enriched in NAD loci, usually localized to either the nucleolar periphery or to the nuclear  
404 lamina (24,40,58) . In mouse cells, the Xi-nucleolar association is cell cycle-dependent, with  
405 frequencies peaking during mid-to-late S phase. A genetic deletion was used to show that  
406 the long non-coding RNA Xist, which is expressed from the Xi chromosome, is required for  
407 normal Xi-perinucleolar localization. Deletion of Xist results in diminished H3K27me3  
408 enrichment and increased synthesis of Cot-1-hybridizing, repeat-derived RNAs on the Xi  
409 (24). These data suggest that perinucleolar localization of Xi contributes to the  
410 maintenance of heterochromatin structure. More recently, depletion of long non-coding  
411 RNA Firre was shown to reduce association of the Xi to nucleolus in mouse cells, and also  
412 reduces H3K27me3 density on the Xi (60). However, *Firre* depletion has minimal effects on  
413 Xi gene silencing, consistent with the idea that multiple functionally overlapping factors  
414 affect Xi heterochromatin localization and gene silencing.

415 Here, we discovered that Ki-67 affects the Xi-nucleolus interaction. Analysis of  
416 synchronized RPE-1 cells shows that the association appears more slowly in Ki-67-  
417 depleted cells, coincident with the delay in S phase entry. In addition to this delay, Ki-67  
418 depletion alters some of the heterochromatin characteristics of the Xi, causing significantly  
419 increased levels of Cot-1-hybridizing RNAs and Pol II, and decreased enrichment of  
420 H3K27me3 and H4K20me1. This loss of heterochromatic properties is partial in the cell  
421 population, and we do not detect uniform reactivation of Pol II genes on the Xi. These data  
422 are consistent with previous studies showing that multiple overlapping mechanisms  
423 maintain the inactive status of the Xi (60,61). We note that XIST levels are not reduced  
424 upon Ki-67 depletion (Supplemental Table 2; Fig. 10), suggesting that altered XIST levels  
425 are unlikely to explain the effect of Ki-67 on the Xi. Instead, our data is consistent with the  
426 view that Ki-67 is one of the factors that contributes to the maintenance of heterochromatic  
427 structures of the Xi (12) in this case in a manner coupled to S phase progression.

428 Recent data show that the nuclear lamina localization mediated by the interaction  
429 between XIST and the lamina B receptor facilitates the spreading of XIST on the Xi  
430 chromosome, which in turn contributes to transcriptional silencing (62). This raises the  
431 question of whether there are specific protein factors that contribute to the association of  
432 the Xi with the nucleolus in addition to the lncRNAs XIST and FIRRE (24,60). Could Ki-67 be  
433 such a factor? In support of this idea, Ki-67 is also required for association of other  
434 heterochromatic regions with nucleoli in interphase cells (11,12,22).

435 It appears that the erosion of heterochromatic features on the Xi occurs in a  
436 significant fraction of Ki-67-depleted cells away from the nuclear lamina, but the lamin-  
437 associated Xi chromosomes are not altered. There are two possibilities to explain these

438 data. First, it may be that lamina association confers protection from heterochromatin  
439 changes. Alternatively, Xi chromosomes that are most severely affected by Ki-67 depletion  
440 may preferentially relocalize away from the lamina. Because our shRNA-based experiments  
441 necessitate a 72-hour period to achieve strong Ki-67 depletion, there is likely passage  
442 through multiple mitoses for each cell during this period. As Ki-67 is a key component of  
443 the perichromosomal layer that envelopes each mitotic chromosome (11,15), it is tempting  
444 to speculate that the loss of Ki-67 affects the reassociation of heterochromatic sequences  
445 with the nuclear lamina or nucleoli after mitotic exit.

446

## 447 **Materials and Methods**

### 448 **Antibodies and Immunoblotting**

449 The following antibodies were used in this work:

450 rabbit anti-Ki-67 (Abcam Ab15580)

451 mouse anti-beta-tubulin (Ubpbio Y1060)

452 rabbit anti-fibrillarin (Abcam ab5821-100)

453 mouse anti-BrdU antibody (MoBu-1) (Abcam ab8039)

454 mouse anti-p21 antibody (Abcam ab109520)

455 rabbit anti-mcrosH2A.1 (Abcam ab37264)

456 mouse anti-Rb antibody (4H1) (Cell signaling 9309)

457 mouse anti-H4K20Me1 (Active motif 39727)

458 mouse anti-RNA polymerase II, clone CTD4H8 (Millipore 05-623)

459 mouse anti-nucleophosmin (Santa Cruz Biotechnology sc-32256)

460 rabbit anti-WSTF (Cell signaling 2152)

461 rabbit anti-H3K27Me3 (Active motif 39535)

462

463 Amersham ECL Rabbit IgG, HRP-linked whole Ab (Gelifescience NA934)

464 Donkey anti-Rabbit IgG (H+L) Secondary Antibody, Alexa Fluor® 594 (Life Technologies A-  
465 21207)

466 Donkey anti-Rabbit IgG (H+L) Secondary Antibody, Alexa Fluor® 488 (Life Technologies  
467 A-21206)

468 Streptavidin, Alexa Fluor® 488 Conjugate (Invitrogen S-32354)

469 DyLight 594 Labeled Anti-Digoxigenin/Digoxin (Vector Labs DI-7594)

470 For immunoblotting, cells were collected 3 days after RNAi transfection. Whole-cell lysates  
471 were extracted in 20 mM Tris-HCl 7.5, 1% SDS and 10% glycerol supplemented with  
472 protease inhibitor cocktail (Sigma P8340-1ml). The lysates were sonicated in a Bioruptor  
473 set on high power for one 5 min cycle, with 30s on/30s off. 15 µg of each lysate were  
474 separated by SDS-PAGE, transferred to PVDF membrane and probed as described in the  
475 figure legends.

476

## 477 **Cell Cultures**

478 hTERT-RPE1 cells (a kind gift from Dr. Judith Sharp) and hTERT-BJ were cultured in  
479 DMEM-F12 medium (VWR 12001-600) with 10% fetal bovine serum (FBS, Hyclone  
480 #SH30910.03), 1% penicillin/streptomycin, 5% L-glutamine and 7.5% sodium bicarbonate  
481 solution.

482 HeLa and U2OS cells were propagated in DMEM medium supplemented with 10% fetal  
483 bovine serum. Cells were maintained > 25% confluence and passaged every three days.

484 Human foreskin fibroblasts (HFF, a kind gift from Dr. Jennifer Benanti, University of  
485 Massachusetts Medical School (63) were maintained in DMEM containing 10% FBS and  
486 antibiotic/antimycotic solution. HFF cells were grown at >25% confluence and were split  
487 1:4 every 2 days. All cells were maintained in a 37 °C incubator with 5% CO<sub>2</sub>.  
488 WI-38 cells were maintained in DMEM and supplemented with 10% FBS, 2 mM L-  
489 glutamine and antibiotic/antimycotic solution (Life Technologies, Carlsbad, CA). WI-38  
490 cells were grown at >25% confluence and were split 1:4 every 2 days.  
491 IMR-90 and MDA-MB-231 were maintained in DMEM medium with 10% FBS, 2mM L-  
492 glutamine, and antibiotic/antimycotic solution. The cells were cultured at >25% confluence  
493 and were split every 2 days.  
494 HCT 116 (a kind gift of Dr. Anastassiia Vertii, University of Massachusetts Medical School)  
495 and 293T cells were cultured in DMEM medium with 10% FBS. The cells were split 1:4  
496 every 3 days  
497 MCF7 cells were grown in RPMI medium with 10% FBS. The cells were split 1:3 every 3  
498 days.  
499 For hydroxyurea treatment, hTERT-RPE1 cells were cultured in the presence of 2 mM  
500 hydroxyurea for 15 h, then washed with three times phosphate-buffered saline (PBS) and  
501 released into hydroxyurea-free medium and harvested at the indicated time points.

502

### 503 **sgRNA design**

504 For editing the siRNA target site in the endogenous Ki-67 locus, four highest scoring single  
505 guide RNAs (sgRNAs) targeting nucleotides 9661-9722 of the genomic DNA (NG\_047061)

506 were selected by using the CRISPR Design web tool at <http://crispr.mit.edu/> (64). The  
507 sgRNA sequences are shown below:

508 5'-ACGTGCTGGCTCCTGTAAGT-3' (antisense)

509 5'-TCTAGCTTCTCTTCTGACCC-3' (sense)

510 5'-GATCTTGAGACACGACGTGC-3' (antisense)

511 5'-CTTCTGACCCTGGTGAGTAG-3' (sense)

512 These were cloned into a variant of the pX330 plasmid (64) with a puromycin-resistance  
513 cassette (a kind gift from Kurtis McCannell and Dr. Thomas Fazzio, University of  
514 Massachusetts Medical School) as previously described (65). To determine the most  
515 efficient sgRNAs, 293T cells were transfected with FuGENE HD (Promega, catalog number  
516 E2311) according to manufacturer's instructions. 500 ng of sequence-verified CRISPR  
517 plasmid (pSpCas9-sgRNA) was transfected into  $200 \times 10^3$  cells in 24 well dish. 48 hours  
518 post-transfection, DNA was extracted using QuickExtract DNA extraction solution  
519 (Epicentre, catalog number QE09050) according to manufacturer's instructions. Genomic  
520 DNA was PCR amplified using a *Taq* DNA Polymerase (New England Biolabs, catalog  
521 number M0273). The following primers were used for PCR amplification:

522 F2 primer: GGGTTCCAGCAATTCTCCTG

523 R primer: TCACCAAGGGAAAGTTAGGC

524 514 bp PCR products were ran on agarose gel and purified using Zymoclean Gel DNA  
525 recovery kit (Zymo Research, catalog number D4007) and sent for Sanger sequencing at  
526 Genewiz sequencing facility. The following primer was used for sequencing:

527 F primer: GCCAGGCTGTTCTCAAACCTC

528 To assess gene editing in 293T cells by four sgRNA plasmids, TIDE web tool at [https://tide-](https://tide-calculator.nki.nl/)  
529 [calculator.nki.nl/](https://tide-calculator.nki.nl/) was used (66). Trace data for PCR fragment from GFP-transfected 293T  
530 cells were used as a control sample chromatogram, and trace data for PCR fragments from  
531 CRISPR plasmid-transfected cells were used as test sample chromatograms. The following  
532 sgRNA was selected due to its efficiency in cutting and proximity to the siRNA site:  
533 5'-GATCTTGAGACACGACGTGC-3' (referred to as sgKi-67 from now on).

534

### 535 **Co-transfection of CRISPR plasmid and HDR template into hTERT-RPE1 cells**

536 An HDR repair template carrying the siRNA-resistance conferring mutations, Eco0109I site  
537 and 700 bp homology flanks on each side was purchased as a gBlock from Integrated DNA  
538 Technologies. The template was cloned into pCR2.1 (Thermo Fisher Scientific, catalog  
539 number K200001) according to manufacturer's instructions.

540 The sgKi-67 was cloned into a variant of the pX330 plasmid(64) with a neomycin-  
541 resistance cassette (a kind gift from Kurtis McCannell and Dr. Thomas Fazzio, University of  
542 Massachusetts Medical School) to facilitate gene editing in hTERT-RPE1. 3.3  $\mu$ g of a 1:1  
543 (v/v) mix of repair template and CRISPR plasmid were transfected using FuGENE HD into  
544  $75 \times 10^3$  cells in 6 well dish. Starting 48 hours post-transfection, cells were cultured in  
545 selection medium with 800  $\mu$ g/ml of G418 (Sigma-Aldrich, catalog number A1720) for 7  
546 days, with selection medium being changed every other day. Cells were recovered in G418-  
547 free medium for 4 days, after which cells were trypsinized and diluted to 0.5 cells per 200  
548  $\mu$ l and seeded into 96-well plates. A week later plates were inspected for wells with single  
549 colonies, and 4 days after that replica plated into  $2 \times 96$ -well plates. One plate was frozen  
550 down, the second one used to maintain and passage the cells. Once cells on the third plate



551 were at least ~70% confluent, DNA was extracted using QuickExtract DNA extraction  
552 solution and PCR amplified using the following primers.  
553 F3 primer: TGGCCCATTTATGAGAAAAGTGA  
554 R2 primer: GGGAACAGACTTCAATTCTCCA  
555 1523 bp PCR products were further digested with Eco0109I restriction enzyme (New  
556 England Biolabs, catalog number R0503S). PCR products from successfully integrated  
557 clones were expected to be digested at 751 and 772 bp. PCR products for clones positive  
558 for the Eco0109I digested bands were ran on agarose gel, purified using Zymoclean Gel  
559 DNA recovery kit and sent to Genewiz for Sanger sequencing. Primers F2 and R2 shown  
560 above were used for Sanger sequencing.

561

## 562 **Immunofluorescence**

563 Cells grown on glass coverslips were fixed in 4% paraformaldehyde for 10 min and then  
564 permeabilized with 0.5% Triton X-100 for 10 min at room temperature. The fixed cells  
565 were blocked in 5 % goat serum for 30 min, and incubated in primary antibody at 37 °C in  
566 a humidified chamber for 1h. The cells were washed with PBS for 5 min three times,  
567 incubated with secondary antibody for 1 h at 37 °C in humidified chamber, followed by  
568 three PBS washes, 5 min each. Slides were then incubated with 130 ng/ml 4,6-diamidino-2-  
569 phenylindole (DAPI) for 5 min and mounted in Vectashield mounting medium (Vector Lab,  
570 H-1000)  
571 Images were taken on a Zeiss Axioplan2 microscope with a 63× objective. Entire cells were  
572 imaged via Z stacks taken at 200 nm step-intervals. Approximately 25 stacks were taken

573 per cell, and displayed as 2D maximum intensity projections generated using AxioVision  
574 version 4.6.  
575 The Xi-nucleolar association frequencies were scored in a blinded manner. Entire cells  
576 were imaged via Z stacks taken at 200 nm step-intervals. Approximately 25 stacks were  
577 taken per cell, and displayed as 2D maximum intensity projections generated using  
578 AxioVision version 4.6. The Xi-nucleolar association frequencies on individual coverslips  
579 were scored in a blinded manner. The criteria for Xi-nucleolar or lamina association was  
580 that there were no pixels between the fluorescence signals from the XIST FISH probe and  
581 fibrillarin immunostaining (for nucleolar association) or DAPI staining of the nuclear edge  
582 (for lamina association). Densitometry of individual immunostained cells was performed in  
583 Image J 10.2 (48), using the macro script of the RGB Profiles Tool for all experiments. The  
584 quantifications of H3K27me3, macroH2.A and H4K20me1, Cot-1 and Pol II enrichment  
585 were also performed in Image J 10.2 (48).

586

### 587 **Visualization of 5-ethynyl-2-deoxyuridine(EdU)-labeled nascent DNA**

588 hTERT-RPE1 cells were grown on glass coverslips in DMEM/F12 media as described above.  
589 5-ethynyl-2-deoxyuridine (EdU) was added to the culture medium at concentration of 10  
590  $\mu$ M for 20 min. After labeling, cells were washed three times with PBS. Cells were then  
591 permeablized in 0.5% Triton X-100 for 30 seconds and then fixed in 10% formaldehyde for  
592 10 min. Cells were then rinsed twice with PBS and then incubated 30 min in 100 mM Tris-  
593 HCl pH 8.5, 1 mM CuSO<sub>4</sub>, 100 mM ascorbic acid plus 50 mM carboxyrhodamine 110-azide  
594 for click-chemistry labeling. After staining, the cells on coverslips were washed three times

595 with PBS plus 0.5% Triton X-100, 5 min each. Cells were then counterstained with DAPI,  
596 mounted in Vectashield and imaged by fluorescence microscopy as above.

597

### 598 **Immuno-RNA-FISH and RNA-FISH**

599 The plasmid pGIA which contains human XIST exons 4, 5 and 6 was a gift from Dr Judith  
600 Sharp. Cot-1 probe was from Invitrogen (Sigma 11581074001). The probes were labeled  
601 either with biotin-14-dCTP or digoxigenin-11-dUTP using the BioPrime DNA labeling  
602 system (Invitrogen 18094-011).

603 For immunofluorescence (IF) combined with RNA-FISH, IF was performed first as above.

604 Cells were then re-fixed in 4% paraformaldehyde for 10 min at room temperature. The  
605 cells were then dehydrated in 75%, 85%, 95% and 100% ethanol for 2 min each.

606

607 Approximately 150 ng of each probe was mixed with 20  $\mu$ g single-stranded salmon sperm  
608 DNA (Sigma-Aldrich) and 12  $\mu$ g E. coli tRNA and then air-dried in a speed vacuum,  
609 resuspended in 20  $\mu$ l 50% formamide / 50% hybridization buffer (20% Dextran Sulfate in  
610 4 $\times$  SSC), denatured at 80  $^{\circ}$ C for 10 min and pre-annealed at 37  $^{\circ}$ C for 30 min prior to  
611 hybridization. Hybridizations were performed overnight in a humidified chamber at 37 $^{\circ}$ C.  
612 The next day, cells were washed for 20 min in 50% formamide in 2 $\times$  SSC at 37 $^{\circ}$ C and then  
613 for 20 min in 2 $\times$  SSC at 37 $^{\circ}$ C and 20 min in 1 $\times$  SSC at 37 $^{\circ}$ C. The hybridized probes were  
614 detected by incubation with either Alexa fluor-488 conjugated to streptavidin (Invitrogen  
615 S-32354) or Dylight 594 labeled anti-Digoxigenin/Digoxin (Vector Labs, DI-7594) at 1:500  
616 dilutions for 60 min in a 37 $^{\circ}$ C humid chamber. After incubation, slides were washed twice

617 in 50% formamide, 2× SSC for 5 min and once in 1× SSC for 5 min in a 37°C humid chamber  
618 before DAPI staining as above.

619

## 620 **RNAi experiments**

621 The siRNA targeting human Ki-67 is from the collection of Silencer Select Predesigned  
622 siRNAs (Thermo Fisher Scientific), and targets nucleotides 559-577 of the cDNA  
623 (NM\_002417.4).

624 Its sequence is as follows:

625 sense CGUCGUGUCUCAAGAUCUAtt,

626 antisense UAGAUCUUGAGACACGACGtg

627 TP53 (NM\_00546.5)

628 Forward primer for hTP53: GAAAUUUGCGUGUGGAGUAtt

629 Reverse primer for hTP53:UACUCCACACGCAAUUUCct

630 p21(NM\_078467.2)

631 Forward primer for hp21: CAAGGAGUCAGACAUUUUAtt

632 Reverse primer for hp21: UAAAAUGUCUGACUCCUUGtt

633

634 esiRNA targeting human Ki-67 was generated by in vitro RNaseIII cleavage of T7 RNA

635 polymerase-synthesized transcripts, as previously described (21,67), and targets internal

636 repeat regions at nucleotides 3611-4047, 3979-4357, 4705-5098 and 6913-7347 of the

637 cDNA (NM\_002417.4).

638 Forward primer for hKi-67

639 gcgtaatacgaactcactataggGTGCTGCCGGTTAAGTTCTCT

640 Reverse primer for hKi-67

641 gcgtaatacgactcactataggGCTCCAACAAGCACAAAGCAA

642 Forward primer for luciferase

643 gcgtaatacgactcactataggAACAATTGCTTTTACAGATGC

644 Reverse primer for luciferase

645 gcgtaatacgactcactataggAGGCAGACCAGTAGATCC

646 Cells were transfected with Lipofectamine RNAi MAX (Invitrogen Catalog number

647 13778100) following manufacturer's instructions.

648 For esiRNA transfection, 500ng of esiRNA targeting either luciferase control or Ki-67 was

649 transfected into  $40 \times 10^3$  cells in a 6-well dish.

650 For siRNA transfection, 40 nM of either scramble or siKi-67 was transfected into  $40 \times 10^3$

651 cells in a 6-well dish.

652 The cells were harvested 72 hrs after transfection for immunoblotting, RT-qPCR, RNA-seq,

653 FACS or FISH analysis.

654

### 655 **Flow cytometry**

656 BrdU incorporation was analyzed based on published protocols (68). Cells were pulsed

657 labeled with 50  $\mu$ M bromodeoxyuridine (BrdU) for the indicated time periods. Cells were

658 then washed twice with PBS and fixed in 70% ethanol at 4°C for 1 hour. Post-fixed cells

659 were denatured in 2N HCl/0.5% Triton-X for 30 minutes. After denaturation, cells were

660 washed once in 0.1 M sodium tetraborate for 2 minutes and once in PBS/1% BSA. After

661 that, cells were resuspended in 1  $\mu$ g/ml anti-BrdU antibody/PBS/1% BSA for 1 hr, followed

662 by three washes with 0.5% Tween 20/1% BSA/PBS. The cells were incubated with 0.5

663  $\mu\text{g/ml}$  secondary antibody/PBS/1% BSA for 30 minutes and counterstained with 50  $\mu\text{g/ml}$   
664 propidium iodide / PBS and analyzed on a LSR II (BD Biosciences). The data was analyzed  
665 with FlowJo v9.9.4 software (TreeStar, Ashland, OR).

666

### 667 **RNA isolation and real time quantitative PCR**

668 Total RNA from cells 72 hours post-transfection was isolated using Trizol (Invitrogen  
669 15596026) following manufacturer's instructions and purified using the RNeasy kit  
670 (Qiagen 74104).

671 One microgram of RNA was subjected to reverse transcription with SuperScript II Reverse  
672 Transcriptase (Invitrogen 18064014). qPCR reactions were performed on an Applied  
673 Biosystem StepOnePlus machine (Life Technologies) using FAST SYBR mix (KAPA  
674 Biosystem). The program used is as follows: hold 98°C for 30 s, followed by 40 cycles of  
675 95°C for 10 s and 60°C for 30 s. All the signals were normalized with beta-actin as indicated  
676 in the figure legends and the  $2^{-\Delta\Delta\text{Ct}}$  method was used for quantification (Life technologies).  
677 Primer sequences are designed by Primer3Plus software (69). All oligonucleotides for  
678 qPCR are listed in Supplemental Table 5.

679

### 680 **RNAseq: sample preparation and analysis**

681 RNA was isolated as described above. Libraries from two replicates for each condition were  
682 constructed in a strand-specific manner via the dUTP method by BGI and sequenced using  
683 Illumina-HiSeq 2000/2500 platform (BGI) as single-end 50-base reads. 29M and 31M  
684 mapped reads were obtained from two si-scramble-treated controls, 28M and 29M were  
685 obtained from two siKi-67 knockdown replicates.

686 Reads were aligned to the human reference genome (hg19) using Tophat 2.0.14 (70,71).  
687 Differential expression analysis was determined by Cufflinks 2.2.1 (72). In addition, the  
688 Reactome analyses were performed using Bioconductor package ChIPpeakAnno (version  
689 3.2.0)(73,74). Genes that showed differential expression with BH-adjusted q value < 0.05  
690 (75) between control and Ki-67 depletion samples were selected for the Reactome analysis.  
691  
692 For the SNP analysis, the genotype (SNPs) information of the RPE cell line (76) from GEO  
693 sample GSM1848919.  
694 (<https://www.ncbi.nlm.nih.gov/geo/query/acc.cgi?acc=GSM1848919>) was annotated  
695 based on R bioconductor package "SNPlocs.Hsapiens.dbSNP144.GRCh38".  
696 *SNPlocs.Hsapiens.dbSNP144.GRCh38: SNP locations for Homo sapiens (dbSNP Build 144)*. R  
697 package version 0.99.20.) The SNP locations were further annotated by ChipPeakAnno  
698 package (73).

699

## 700 **Accession Numbers**

701 The data discussed in this publication have been deposited in NCBI's Sequence Read  
702 Archive (SRA, <http://www.ncbi.nlm.nih.gov/sra/>) and are accessible through SRA Series  
703 accession number SRR4252548.

704

## 705 **Acknowledgments**

706 We would like to thank Michael Brodsky for the generous use of the AxioPlan microscope.  
707 This work was supported by NIH grants R01 GM55712 and U01 DA040588 to PDK.

708

709 References

- 710 1. **Gerdes J, Schwab U, Lemke H, Stein H.** 1983. Production of a mouse monoclonal  
711 antibody reactive with a human nuclear antigen associated with cell proliferation. *Int*  
712 *J Cancer* **31**:13–20.
- 713 2. **Gerdes J, Lemke H, Baisch H, Wacker HH, Schwab U, Stein H.** 1984. Cell cycle  
714 analysis of a cell proliferation-associated human nuclear antigen defined by the  
715 monoclonal antibody Ki-67. *J Immunol* **133**:1710–1715.
- 716 3. **Gerdes J, Stein H, Pileri S, Mt R, Gobbi M, Ralfkiaer E, Km N, Pallesen G, Bartels**  
717 **H, Palestro G.** 1987. Prognostic relevance of tumour-cell growth fraction in  
718 malignant non- Hodgkin’s lymphomas. *Lancet* **2**:448–449.
- 719 4. **Dowsett M, Nielsen TO, A’Hern R, Bartlett J, Coombes RC, Cuzick J, Ellis M, Henry**  
720 **NL, Hugh JC, Lively T, McShane L, Paik S, Penault-Llorca F, Prudkin L, Regan M,**  
721 **Salter J, Sotiriou C, Smith IE, Viale G, Zujewski JA, Hayes DF.** 2011. Assessment of  
722 Ki67 in Breast Cancer: Recommendations from the international Ki67 in breast  
723 cancer working Group. *J Natl Cancer Inst* **103**:1656–1664.
- 724 5. **Verheijen R, Kuijpers HJ, Schlingemann RO, Boehmer AL, van Driel R,**  
725 **Brakenhoff GJ, Ramaekers FC.** 1989. Ki-67 detects a nuclear matrix-associated  
726 proliferation-related antigen. I. Intracellular localization during interphase. *J Cell Sci*  
727 **92 ( Pt 1)**:123–30.
- 728 6. **Kill IR.** 1996. Localisation of the Ki-67 antigen within the nucleolus. Evidence for a  
729 fibrillar-deficient region of the dense fibrillar component. *J Cell Sci* **109 (Pt**  
730 **6)**:1253–1263.
- 731 7. **Cheutin T, O’Donohue M-F, Beorchia A, Klein C, Kaplan H, Ploton D.** 2003. Three-



- 732 dimensional organization of pKi-67: a comparative fluorescence and electron  
733 tomography study using FluoroNanogold. *J Histochem Cytochem* **51**:1411–1423.
- 734 8. **Verheijen R, Kuijpers HJ, van Driel R, Beck JL, van Dierendonck JH, Brakenhoff**  
735 **GJ, Ramaekers FC.** 1989. Ki-67 detects a nuclear matrix-associated proliferation-  
736 related antigen. II. Localization in mitotic cells and association with chromosomes. *J*  
737 *Cell Sci* **92 ( Pt 4)**:531–540.
- 738 9. **Saiwaki T, Kotera I, Sasaki M, Takagi M, Yoneda Y.** 2005. In vivo dynamics and  
739 kinetics of pKi-67: Transition from a mobile to an immobile form at the onset of  
740 anaphase. *Exp Cell Res* **308**:123–134.
- 741 10. **Takagi M, Nishiyama Y, Taguchi A, Imamoto N.** 2014. Ki67 antigen contributes to  
742 the timely accumulation of protein phosphatase 1 $\gamma$  on anaphase chromosomes. *J Biol*  
743 *Chem* **289**:22877–22887.
- 744 11. **Booth DG, Takagi M, Sanchez-Pulido L, Petfalski E, Vargiu G, Samejima K,**  
745 **Imamoto N, Ponting CP, Tollervey D, Earnshaw WC, Vagnarelli P.** 2014. Ki-67 is a  
746 PP1-interacting protein that organises the mitotic chromosome periphery. *Elife*  
747 **3:e01641.**
- 748 12. **Sobecki M, Mrouj K, Camasses A, Parisis N, Nicolas E, Lleres D, Gerbe F, Prieto S,**  
749 **Krasinska L, David A, Eguren M, Birling MC, Urbach S, Hem S, Dejardin J,**  
750 **Malumbres M, Jay P, Dulic V, Lafontaine DLJ, Feil R, Fisher D.** 2016. The cell  
751 proliferation antigen Ki-67 organises heterochromatin. *Elife* **5:e13722.**
- 752 13. **Van Hooser AA, Yuh P, Heald R.** 2005. The perichromosomal layer. *Chromosoma*  
753 **114**:377–388.
- 754 14. **Booth DG, Beckett AJ, Molina O, Samejima I, Masumoto H, Kouprina N, Larionov**

- 755 **V, Prior IA, Earnshaw WC.** 2016. 3D-CLEM Reveals that a Major Portion of Mitotic  
756 Chromosomes Is Not Chromatin. *Mol Cell* **64**:790–802.
- 757 15. **Cuylen S, Blaukopf C, Politi AZ, Müller-Reichert T, Neumann B, Poser I,**  
758 **Ellenberg J, Hyman AA, Gerlich DW.** 2016. Ki-67 acts as a biological surfactant to  
759 disperse mitotic chromosomes. *Nature* **535**:308–312.
- 760 16. **Kumar GS, Gokhan E, De Munter S, Bollen M, Vagnarelli P, Peti W, Page R.** 2016.  
761 The Ki-67 and RepoMan mitotic phosphatases assemble via an identical, yet novel  
762 mechanism. *Elife* **5**:e16539.
- 763 17. **Schluter C, Duchrow M, Wohlenberg C, Becker MHG, Key G, Flad - HD, Gerdes J.**  
764 1993. The cell proliferation-associated antigen of antibody Ki-67: A very large,  
765 ubiquitous nuclear protein with numerous repeated elements, representing a new  
766 kind of cell cycle-maintaining proteins. *J Cell Biol* **123**:513–522.
- 767 18. **Kausch I, Lingnau A, Endl E, Sellmann K, Deinert I, Ratliff TL, Jocham D, Sczakiel**  
768 **G, Gerdes J, Böhle A.** 2003. Antisense treatment against Ki-67 mRNA inhibits  
769 proliferation and tumor growth in vitro and in vivo. *Int J Cancer* **105**:710–716.
- 770 19. **Zheng J, Ma T, Cao J, Sun X, Chen J, Li W, Wen R, Sun Y, Pei D.** 2006. Knockdown of  
771 Ki-67 by small interfering RNA leads to inhibition of proliferation and induction of  
772 apoptosis in human renal carcinoma cells. *Life Sci* **78**:724–9.
- 773 20. **Cidado J, Wong HY, Rosen DM, Cimino-mathews A, Garay JP, Fessler AG,**  
774 **Rasheed ZA, Hicks J, Cochran RL, Croessmann S, Zabransky DJ, Mohseni M,**  
775 **Beaver JA, Chu D, Cravero K, Christenson ES, Medford A, Mattox A, De Marzo AM,**  
776 **Argani P, Chawla A, Hurley PJ, Lauring J, Park BH.** 2016. Ki-67 is required for  
777 maintenance of cancer stem cells but not cell proliferation. *Oncotarget* **7**:6281–6293.

- 778 21. **Smith CL, Matheson TD, Trombly DJ, Sun X, Campeau E, Han X, Yates JR,**  
779 **Kaufman PD.** 2014. A separable domain of the p150 subunit of human chromatin  
780 assembly factor-1 promotes protein and chromosome associations with nucleoli. *Mol*  
781 *Biol Cell* **25**:2866–81.
- 782 22. **Matheson TD, Kaufman PD.** 2017. The p150N domain of Chromatin Assembly  
783 Factor-1 regulates Ki-67 accumulation on the mitotic perichromosomal layer. *Mol*  
784 *Biol Cell* **28 (1)**:21–29.
- 785 23. **Bodnar AG, Ouellette M, Frolkis M, Holt SE, Chiu CP, Morin GB, Harley CB, Shay**  
786 **JW, Lichtsteiner S, Wright WE.** 1998. Extension of life-span by introduction of  
787 telomerase into normal human cells. *Science* **279**:349–52.
- 788 24. **Zhang LF, Huynh KD, Lee JT.** 2007. Perinucleolar Targeting of the Inactive X during  
789 S Phase: Evidence for a Role in the Maintenance of Silencing. *Cell* **129**:693–706.
- 790 25. **Dimitrova DS, Berezney R.** 2002. The spatio-temporal organization of DNA  
791 replication sites is identical in primary, immortalized and transformed mammalian  
792 cells. *J Cell Sci* **115**:4037–4051.
- 793 26. **Fischer M, Grossmann P, Padi M, DeCaprio JA.** 2016. Integration of TP53, DREAM,  
794 MMB-FOXM1 and RB-E2F target gene analyses identifies cell cycle gene regulatory  
795 networks. *Nucleic Acids Res* **44**:6070–6086.
- 796 27. **Sadasivam S, DeCaprio JA.** 2013. The DREAM complex: master coordinator of cell  
797 cycle-dependent gene expression. *Nat Rev Cancer* **13**:585–595.
- 798 28. **Bertoli C, Skotheim JM, de Bruin RAM.** 2013. Control of cell cycle transcription  
799 during G1 and S phases. *Nat Rev Mol Cell Biol* **14**:518–28.
- 800 29. **Manning AL, Yazinski SA, Nicolay B, Bryll A, Zou L, Dyson NJ.** 2014. Suppression of

- 801 genome instability in prb-deficient cells by enhancement of chromosome cohesion.  
802 Mol Cell **53**:993–1004.
- 803 30. **Litovchick L, Sadasivam S, Florens L, Zhu X, Swanson SK, Velmurugan S, Chen R,**  
804 **Washburn MP, Liu XS, DeCaprio JA.** 2007. Evolutionarily Conserved Multisubunit  
805 RBL2/p130 and E2F4 Protein Complex Represses Human Cell Cycle-Dependent  
806 Genes in Quiescence. Mol Cell **26**:539–551.
- 807 31. **Schmit F, Korenjak M, Mannefeld M, Schmitt K, Franke C, Von Eyss B, Gagrlica S,**  
808 **Hänel F, Brehm A, Gaubatz S.** 2007. LINC, a human complex that is related to pRB-  
809 containing complexes in invertebrates regulates the expression of G2/M genes. Cell  
810 Cycle **6**:1903–1913.
- 811 32. **Xiong Y, Hannon GJ, Zhang H, Casso D, Kobayashi R, Beach D.** 1993. p21 is a  
812 universal inhibitor of cyclin kinases. Nature **363**:210–211.
- 813 33. **Gartel AL, Radhakrishnan SK.** 2005. Lost in transcription: p21 repression,  
814 mechanisms, and consequences. Cancer Res **65**:3980–3985.
- 815 34. **Labaer J, Garrett MD, Stevenson LF, Slingerland JM, Sandhu C, Chou HS, Fattaey**  
816 **A, Harlow E.** 1997. New functional activities for the p21 family of CDK inhibitors.  
817 Genes Dev **11**:847–862.
- 818 35. **Waga S, Stillman B.** 1998. Cyclin-dependent kinase inhibitor p21 modulates the  
819 DNA primer-template recognition complex. Mol Cell Biol **18**:4177–87.
- 820 36. **El-Deiry WS, Tokino T, Velculescu VE, Levy DB, Parsons R, Trent JM, Lin D,**  
821 **Mercer WE, Kinzler KW, Vogelstein B.** 1993. WAF1, a potential mediator of p53  
822 tumor suppression. Cell **75**:817–825.
- 823 37. **Deng C, Zhang P, Harper JW, Elledge SJ, Leder P.** 1995. Mice lacking

- 824 p21CIP1/WAF1 undergo normal development, but are defective in G1 checkpoint  
825 control. *Cell* **82**:675–684.
- 826 38. **Junk DJ, Vrba L, Watts GS, Oshiro MM, Martinez JD, Futscher BW.** 2008. Different  
827 mutant/wild-type p53 combinations cause a spectrum of increased invasive  
828 potential in nonmalignant immortalized human mammary epithelial cells. *Neoplasia*  
829 **10**:450–61.
- 830 39. **Petersen G.B, Therelsen A. J.** 1962. Number of nucleoli in female and male human  
831 cells in tissue culture. *Exp Cell Res* **28**:590–2.
- 832 40. **Barr ML, Bertram EG.** 1949. A morphological distinction between neurones of the  
833 male and female, and the behaviour of the nucleolar satellite during accelerated  
834 nucleoprotein synthesis. *Nature* **163**:676.
- 835 41. **Bourgeois CA, Laquerriere F, Hemon D, Hubert J, Bouteille M.** 1985. New data on  
836 the in situ position of the inactive X chromosome in the interphase nucleus of human  
837 fibroblasts. *Hum Genet* **69**:122–129.
- 838 42. **Lucchesi JC, Kelly WG, Panning B.** 2005. Chromatin Remodeling in Dosage  
839 Compensation. *Annu Rev Genet* **39**:615–651.
- 840 43. **Kohlmaier A, Savarese F, Lachner M, Martens J, Jenuwein T, Wutz A.** 2004. A  
841 chromosomal memory triggered by Xist regulates histone methylation in X  
842 inactivation. *PLoS Biol* **2**:E171.
- 843 44. **Cao R, Wang L, Wang H, Xia L, Erdjument-Bromage H, Tempst P, Jones RS, Zhang**  
844 **Y.** 2002. Role of histone H3 lysine 27 methylation in Polycomb-group silencing.  
845 *Science* **298**:1039–1043.
- 846 45. **Di Croce L, Helin K.** 2013. Transcriptional regulation by Polycomb group proteins.

- 847 nature structural Mol Biol **20**:1147–55.
- 848 46. **Simon JA, Kingston RE.** 2013. Occupying chromatin: Polycomb mechanisms for  
849 getting to genomic targets, stopping transcriptional traffic, and staying put. Mol Cell  
850 **49**:808–24.
- 851 47. **Beck DB, Burton A, Oda H, Ziegler-Birling C, Torres-Padilla ME, Reinberg D.**  
852 2012. The role of PR-Set7 in replication licensing depends on Suv4-20h. Genes Dev  
853 **26**:2580–2589.
- 854 48. **Chaligné R, Popova T, Mendoza-Parra MA, Saleem MAM, Gentien D, Ban K,**  
855 **Pirot T, Leroy O, Mariani O, Gronemeyer H, Vincent-Salomon A, Stern MH,**  
856 **Heard E.** 2015. The inactive X chromosome is epigenetically unstable and  
857 transcriptionally labile in breast cancer. Genome Res **25**:488–503.
- 858 49. **Politz JCR, Scalzo D, Groudine M.** 2016. The redundancy of the mammalian  
859 heterochromatic compartment. Curr Opin Genet Dev **37**:1–8.
- 860 50. **Kind J, Pagie L, Ortazokoyun H, Boyle S, De Vries SS, Janssen H, Amendola M,**  
861 **Nolen LD, Bickmore WA, Van Steensel B.** 2013. Single-cell dynamics of genome-  
862 nuclear lamina interactions. Cell **153**:178–192.
- 863 51. **Koningsbruggen S van, Gierlinski M, Schofield P, Martin D, Barton GJ, Ariyurek**  
864 **Y, Dunnen JT den, Lamond AI.** 2010. High-Resolution Whole-Genome Sequencing  
865 Reveals That Specific Chromatin Domains from Most Human Chromosomes  
866 Associate with Nucleoli. Mol Biol Cell **21**:3735–3748.
- 867 52. **Ragoczy T, Telling A, Scalzo D, Kooperberg C, Groudine M.** 2014. Functional  
868 redundancy in the nuclear compartmentalization of the late-replicating genome.  
869 Nucleus **5**:626–35.

- 870 53. **Ma H, Naseri A, Reyes-Gutierrez P, Wolfe SA, Zhang S, Pederson T.** 2015.  
871 Multicolor CRISPR labeling of chromosomal loci in human cells. *Proc Natl Acad Sci U*  
872 *S A* **112**:3002–7.
- 873 54. **Benson EK, Mungamuri SK, Attie O, Kracikova M, Sachidanandam R, Manfredi JJ,**  
874 **Aaronson S a.** 2014. p53-dependent gene repression through p21 is mediated by  
875 recruitment of E2F4 repression complexes. *Oncogene* **33**:3959–69.
- 876 55. **Sobecki M, Mrouj K, Colinge J, Gerbe F, Jay P, Krasinska L, Dulic V, Fisher D.**  
877 2017. Cell cycle regulation accounts for variability in Ki-67 expression levels. *Cancer*  
878 *Res canres*.0707.2016.
- 879 56. **Brugarolas J, Moberg K, Boyd S, Taya Y, Jacks T, Lees JA.** 1999. Inhibition of cyclin-  
880 dependent kinase 2 by p21 is necessary for retinoblastoma protein-mediated G1  
881 arrest after gamma-irradiation. *Proc Natl Acad Sci U S A* **96**:1002–1007.
- 882 57. **Chubb JR, Boyle S, Perry P, Bickmore WA.** 2002. Chromatin motion is constrained  
883 by association with nuclear compartments in human cells. *Curr Biol* **12**:439–445.
- 884 58. **Dillinger S, Straub T, Nemeth A.** 2016. Nucleolus association of chromosomal  
885 domains is largely maintained in cellular senescence despite massive nuclear  
886 reorganisation. *BioRxiv* DOI: <http://dx.doi.org/10.1101/054908>
- 887 59. **Németh A, Conesa A, Santoyo-Lopez J, Medina I, Montaner D, Péterfia B, Solovei**  
888 **I, Cremer T, Dopazo J, Längst G.** 2010. Initial genomics of the human nucleolus.  
889 *PLoS Genet* **6**:e1000889.
- 890 60. **Yang F, Deng X, Ma W, Berletch JB, Rabaia N, Wei G, Moore JM, Filippova GN, Xu J,**  
891 **Liu Y, Noble WS, Shendure J, Disteche CM.** 2015. The lncRNA Firre anchors the  
892 inactive X chromosome to the nucleolus by binding CTCF and maintains H3K27me3

- 893 methylation. *Genome Biol* **16:52**.
- 894 61. **Csankovszki G, Nagy A, Jaenisch R.** 2001. Synergism of Xist RNA, DNA methylation,  
895 and histone hypoacetylation in maintaining X chromosome inactivation. *J Cell Biol*  
896 **153:773–783**.
- 897 62. **Chun-Kan Chen, Mario Blanco, Constanza Jackson, Erik Aznauryan, Noah**  
898 **Ollikainen, Christine Surka, Amy Chow, Patrick McDonel, Andrea Cerase,**  
899 **Mitchell Guttman.** 2016. Xist recruits the X chromosome to the nuclear lamina to  
900 enable chromosome-wide silencing. *Science* **354** : 468-472.
- 901 63. **Benanti JA, Galloway DA.** 2004. Normal human fibroblasts are resistant to RAS-  
902 induced senescence. *Mol Cell Biol* **24:2842–52**.
- 903 64. **Cong L, Ran FA, Cox D, Lin S, Barretto R, Habib N, Hsu PD, Wu X, Jiang W,**  
904 **Marraffini LA, Zhang F.** 2013. Multiplex genome engineering using CRISPR/Cas  
905 systems. *Science* **339**: 819–23.
- 906 65. **Ran FA, Hsu PD, Wright J, Agarwala V, Scott DA, Zhang F.** 2013. Genome  
907 engineering using the CRISPR-Cas9 system. *Nat Protoc* **8:2281–2308**.
- 908 66. **Brinkman EK, Chen T, Amendola M, Van Steensel B.** 2014. Easy quantitative  
909 assessment of genome editing by sequence trace decomposition. *Nucleic Acids Res*  
910 **42**: e168.
- 911 67. **Yang D, Buchholz F, Huang Z, Goga A, Chen C-Y, Brodsky FM, Bishop JM.** 2002.  
912 Short RNA duplexes produced by hydrolysis with *Escherichia coli* RNase III mediate  
913 effective RNA interference in mammalian cells. *Proc Natl Acad Sci U S A* **99:9942–**  
914 **9947**.
- 915 68. **Zhu H.** 2012. Cell Proliferation Assay by Flow Cytometry. *Bio-Protocol* **Bio101:e198**.



- 916 69. **Untergasser A, Cutcutache I, Koressaar T, Ye J, Faircloth BC, Remm M, Rozen SG.**  
917 2012. Primer3-new capabilities and interfaces. *Nucleic Acids Res* **40**:e115.
- 918 70. **Trapnell C, Pachter L, Salzberg SL.** 2009. TopHat: Discovering splice junctions with  
919 RNA-Seq. *Bioinformatics* **25**:1105–1111.
- 920 71. **Kim D, Pertea G, Trapnell C, Pimentel H, Kelley R, Salzberg SL.** 2013. TopHat2:  
921 accurate alignment of transcriptomes in the presence of insertions, deletions and  
922 gene fusions. *Genome Biol* **14**:R36.
- 923 72. **Trapnell C, Williams B a, Pertea G, Mortazavi A, Kwan G, van Baren MJ, Salzberg**  
924 **SL, Wold BJ, Pachter L.** 2010. Transcript assembly and abundance estimation from  
925 RNA-Seq reveals thousands of new transcripts and switching among isoforms. *Nat*  
926 *Biotechnol* **28**:511–515.
- 927 73. **Zhu LJ, Gazin C, Lawson ND, Pagès H, Lin SM, Lapointe DS, Green MR.** 2010.  
928 ChIPpeakAnno: a Bioconductor package to annotate ChIP-seq and ChIP-chip data.  
929 *BMC Bioinformatics* **11**:237.
- 930 74. **Zhu LJ.** 2013. Integrative Analysis of ChIP-Chip and ChIP-Seq Dataset. *Methods Mol*  
931 *Biol* **1067**:105–124.
- 932 75. **Wright SP.** 1992. Adjustd p-values for simultaneous inference. *Biometrics* **48**:1005–  
933 1013.
- 934 76. **Passerini V, Ozeri-Galai E, de Pagter MS, Donnelly N, Schmalbrock S,**  
935 **Kloosterman WP, Kerem B, Storchová Z.** 2016. The presence of extra  
936 chromosomes leads to genomic instability. *Nat Commun* **7**:10754.
- 937  
938  
939

940 Figure Legends

941

942 **Figure 1. Ki-67 depletion in hTERT-RPE1 cells reduced S-phase-related mRNA**

943 **abundance and the proportion of cells in S phase.**

944 A. Scatter plot analysis of RNA levels, comparing two replicate si-scramble RNAseq  
945 analyses of hTERT-RPE1 cells. R: Pearson's correlation coefficient.

946 B. Scatter plot analysis comparing two replicate siKi-67 RNAseq analyses.

947 C. Distribution of RNA level fold changes (FC) measured by RNAseq, comparing si-  
948 scramble and siKi-67-treated hTERT-RPE1 cells. The x-axis shows the mean log<sub>2</sub> value  
949 for normalized counts of abundance levels for each RNA species. The y-axis shows the  
950 log<sub>2</sub> fold change upon Ki-67 depletion. The symmetry of the plot above and below the y  
951 = 0 axis indicates that similar numbers of genes are up- and down-regulated upon Ki-67  
952 depletion.

953 D. Reactome evaluation of RNAseq analysis of si-Ki-67-treated cells. The PATH terms with  
954 a p-value < 5e-05 are graphed.

955 E. RNA levels of DNA replication genes are coordinately down-regulated in siKi-67-treated  
956 cells. RT-qPCR measurements are presented as fold change relative to the scramble  
957 siRNA control after normalization. *MKI67* mRNA levels indicate effectiveness of the  
958 siRNA treatment. Data are mean ± std. dev. of 3 biological replicates.

959 F. Analysis of RNA levels as in panel E, except that cells were treated with in vitro-diced  
960 esiRNAs as depletion reagents.

961 G. FACS analysis of siRNA-treated cells. Cells were pulsed with BrdU for 20 min, and  
962 analyzed via two-dimensional flow cytometry monitoring BrdU incorporation (y-axis)

963 and DNA content (x-axis). G1 (lower left), G2 (lower right), and S-phase populations  
964 (upper box) are boxed in each sample, with percentages of the total population shown.  
965 Data shown are from one representative experiment of three biological replicates  
966 performed.

967 H. FACS analysis as in panel G, except that cells were treated with esiRNAs.

968 I. Quantification of percentage of cells in S-phase in siRNA-treated hTERT-RPE1  
969 populations from three biological replicate BrdU-labeling experiments. p-value  
970 comparing si-scramble and si-Ki-67 treatments is indicated, calculated via an unpaired,  
971 two-tailed parametric t test.

972 J. Quantification of percentage of cells in G1 or G2/M phase from the same three  
973 experiments analyzed in panel I.

974 K. Quantification of percentage of S-phase cells as in panel I, except that cells were treated  
975 with in vitro-diced esiRNAs.

976 L. Quantification of percentage of cells in G1 or G2/M phase from the same three  
977 experiments analyzed in panel K.

978 M. Immunoblot analysis of Ki-67 depletion in siRNA-treated hTERT-RPE1 cells from panel  
979 D. Marker molecular weights are indicated on the left.

980 N. Immunoblot analysis of Ki-67 depletion in esiRNA-treated hTERT-RPE1 cells from  
981 panel F.

982

983 **Figure 2. Validation of specificity and effectiveness of Ki-67 depletion reagents.**

984 A. CRISPR/Cas9-based strategy for generating siRNA-resistant mutations in the  
985 endogenous Ki-67 gene. The si-Ki-67 target (green) and sgRNA-directed cleavage site

986 (red triangle) are indicated on the upper diagram of the endogenous locus. Altered  
987 nucleotides (red) and the novel EcoO109I restriction site are shown on the lower  
988 diagram of the repair template.

989 B. DNA sequence analysis of a PCR product from wild-type hTERT-RPE1 cells and si-Ki-67-  
990 resistant clone #7.

991 C. EcoO109I digestion of the same PCR product sequenced in panel B.

992 D. Immunoblot analysis of clone #7 treated with the indicated reagents.

993 E. RT-qPCR analysis of clone #7.

994 F-L. Immunoblot analyses of the indicated cell lines, treated with the indicated RNA  
995 depletion reagents.

996

997 **Figure 3. siRNA-mediated Ki-67 depletion affected S-phase gene expression and cell**  
998 **cycle distribution in diploid human cells.**

999 WI-38 (panels A-D), IMR-90 (panels E-H), hTERT-BJ (panels I-L) cell lines and human  
1000 primary fibroblasts (HFF, panels M-P) were analyzed.

1001 A, E, I, M. RT-qPCR analysis, as in Figure 1E.

1002 B, F, J, N. FACS analysis, as in Figure 1G.

1003 C, G, K, O. Quantification of percentage of S-phase cells, as in Figure 1I.

1004 D, H, L, P. Quantification of percentage of G1 and G2/M phase cells as in Figure 1J.

1005

1006 **Figure 4. esiRNA-mediated depletion of Ki-67 in diploid cells resulted in the same**  
1007 **phenotypes observed with siRNA treatments.** Cells and assays were the same as in

1008 Figure 3.

1009

1010 **Figure 5. Ki-67-insensitive cells.** Ki-67 depletion did not affect S-phase gene expression  
1011 and cell cycle distribution in HeLa (panels A-D), U2OS (panels E-H), and 293T (panels I-L)  
1012 cell lines. Panels A, E, I: RT-qPCR analysis. Panels B, F, J: FACS analysis. Panels C, G, K:  
1013 Quantification of percentage of S-phase cells. Panels D, H, L: Quantification of percentage of  
1014 G1 and G2/M phase cells.

1015

1016 **Figure 6. esiRNA-mediated depletion of Ki-67 in insensitive-cells resulted in the**  
1017 **same phenotypes observed with siRNA treatments.** Cells and assays were the same as  
1018 in Figure 5.

1019

1020 **Figure 7. Depletion of Ki-67 delayed S-phase entry in hTERT-RPE1 cells.**

1021 A. Schematic of short-pulse assay. hTERT-RPE1 cells were released from HU arrest for the  
1022 indicated time periods, pulsed for 20 min with EdU, and analyzed by click chemistry  
1023 and fluorescence microscopy for EdU incorporation.

1024 B. Representative cells from the indicated time points, showing EdU staining (green) to  
1025 detect the progression of S phase. Total DNA was visualized with DAPI staining (blue). S  
1026 phase cells were categorized into 3 sub-stages based on the number, size, shape and  
1027 distribution of fluorescent-labeled replication foci. During early S phase, small and  
1028 numerous replication foci were scattered in the nuclear interior, but excluded from  
1029 nucleolus, nuclear periphery and other heterochromatic regions. At mid-S phase,  
1030 replication takes place at the nuclear periphery and perinucleolar regions. Late in S  
1031 phase, there are several large foci throughout the nucleus (25). Scale bar: 5  $\mu$ m.

- 1032 C. Distributions of EdU morphologies during the time course. Percentages of early S phase,  
1033 middle S phase and late S phase EdU staining morphologies were counted in >300 total  
1034 cells per time point.
- 1035 D. FACS histograms showing cell-cycle profiles of propidium-iodide stained hTERT-RPE1  
1036 cells. Asy: Asynchronous cells were incubated with DMSO vehicle control. HU block:  
1037 cells were incubated with hydroxyurea. Left panel: si-scramble-treated cells were  
1038 incubated with or without 2mM hydroxyurea for 15 hours. Right panel: siKi-67-treated  
1039 cells were incubated with or without 2mM hydroxyurea for 15 hours. Histograms were  
1040 generated using FlowJo v9.9.4.
- 1041 E. A longer (three hour) EdU pulse prevents detection of S phase alterations in Ki-67-  
1042 depleted hTERT-RPE1 cells. Asynchronous cells were treated with either si-scramble or  
1043 siKi-67 for 72 hrs, incubated with 5-ethynyl-2-deoxyuridine (EdU) for the final 3 hours,  
1044 and analyzed via click chemistry. The total cells assayed = 218 for si-scramble and 265  
1045 for siKi-67, in three independent experiments. Scale bar, 20  $\mu$ m
- 1046 F. Ratio of EdU-positive cells to the total cell numbers. ns: not significant (p-value = 0.77).
- 1047 G. Cell cycle distribution of the si-scramble and siKi-67 treated hTERT-RPE1 cells as  
1048 analyzed by one-dimensional FACS profiling of propidium iodide-stained cells.

1049

1050 **Figure 8. Rb contributes to transcriptional downregulation caused by Ki67 depletion.**

- 1051 A. Summary of transcriptional changes of cell cycle target genes (based on Table S10 in  
1052 (26)). The “Adjusted Cell Cycle Score” on the y-axis indicates values based on meta-  
1053 analysis of 5 different cell cycle expression data sets, plus information regarding  
1054 binding by Rb/E2F and MMB/FOXK1 transcription factors. Negative values indicate

- 1055 frequent detection of G1/S expression and binding by Rb/E2F, and positive values  
1056 indicate frequent detection of G2/M expression and binding by MMB-FOXM1.
- 1057 B. p-values of transcription changes of E2F target genes (based on Table S9 in (26)), with  
1058 the greater score on the x-axis representing higher frequency of detection as an E2F  
1059 target. As expected from panel A, E2F targets are commonly downregulated upon Ki-67  
1060 depletion.
- 1061 C. Immunoblot analysis hTERT-RPE1 Tet-sh-Rb cells. Cells were treated with either  
1062 vehicle (Rb+) or 2  $\mu$ g/ml doxycycline (Rb-) as indicated for 72 h to induce sh-Rb  
1063 expression, and were also incubated in the presence of either si-scramble (Ki-67+) or  
1064 siKi-67 (Ki-67-).
- 1065 D. RT-qPCR analysis of DNA replication genes in cells treated as in panel C. Measurements  
1066 are presented as fold change relative to the scramble siRNA control without  
1067 doxycycline induction. Data are mean  $\pm$  std. dev. of 3 biological replicates. p-values were  
1068 calculated via unpaired, two-tailed parametric t tests and corrected for multiple  
1069 comparisons using the Holm-Sidak method.
- 1070 E. Percentage of S phase cells calculated from three BrdU labeling experiments. p-values  
1071 were calculated via unpaired, two-tailed parametric t tests.
- 1072 F. FACS analysis of a representative BrdU labeling experiment.
- 1073 G. p-values of transcription changes of DREAM target genes (based on Table S7 in (26)),  
1074 with the greater score on the x-axis representing more frequent detection as a DREAM  
1075 target.
- 1076 H. Model. In “Ki-67 sensitive” cells, depletion of Ki67 leads to p21 induction. The elevated  
1077 p21 levels are predicted to downregulate the Rb/E2F and DREAM target G1/S cell cycle

1078 genes and inhibit DNA synthesis by binding to PCNA. Together, these effects delay S  
1079 phase entry.

1080 **Figure 9. Cell-type-specific induction of a p21-dependent checkpoint upon depletion**  
1081 **of Ki-67.**

1082 A. RT-qPCR analysis demonstrates cell-type specific induction of *CDKN1A* (p21) RNA upon  
1083 Ki-67 depletion. (left panel) Indicated cells were treated with either si-scramble or si-  
1084 Ki-67 for 72 hrs. (right panel) Same, except cells were treated with esiRNAs.

1085 B. Cell-type specific induction of p21 protein levels upon Ki-67 depletion. hTERT-RPE1  
1086 and 293T cells were treated with the indicated siRNA or in vitro-diced esiRNA depletion  
1087 reagents. p21 protein levels were quantified as a ratio to  $\beta$ -tubulin and normalized to  
1088 levels in control-treated cells. Quantification was done in Image J 10.2.

1089 C. Immunoblot analysis of hTERT-RPE1 cells depleted of the indicated proteins via siRNA  
1090 treatments. Marker molecular weights are indicated on the right.

1091 D. RT-qPCR analysis of DNA replication genes in hTERT-RPE1 cells from panel C. Asterisks  
1092 indicate values in the si-p21 + si-Ki-67 samples that were significantly different ( $p <$   
1093 0.05) from the siKi-67 samples. p-values were calculated via unpaired, two-tailed  
1094 parametric t tests and corrected for multiple comparisons using the Holm-Sidak  
1095 method.

1096 E. Percentage of S phase cells calculated from three BrdU labeling experiments. p-values  
1097 were calculated via unpaired, two-tailed parametric t tests.

1098 F. FACS analysis of a representative BrdU labeling experiment.

1099 G. Immunoblot analysis of additional siRNA-treated cell lines testing for p21 induction.



1100 H. RT-qPCR analysis of the indicated genes in MCF7 cells. p-values calculated as in panel D  
1101 were < 0.05 for all genes.

1102 I. RT-qPCR analysis of the indicated genes in MDA-MB-231 cells.

1103 J. RT-qPCR analysis of the indicated genes in HCT-116 cells.

1104

1105

1106 **Figure 10. H3K27me3 and H4K20me1 staining of the inactive X chromosome was**  
1107 **altered upon Ki-67 depletion in a subset of hTERT-RPE1 cells.** Scale bars, 5  $\mu$ m.

1108 A. Immuno-FISH analysis of H3K27me3 overlap with XIST in siRNA-treated hTERT-RPE1  
1109 cells. Note that in the si-Ki-67-treated cell, the H3K27me3 signal overlapping XIST  
1110 displayed reduced intensity and was localized away from the nuclear lamina.

1111 B. Quantitation of percentage of cells that display reduced H3K27me3 enrichment on the  
1112 Xi in the panel A experiments. Enrichment was calculated as the ratio of the mean  
1113 H3K27me3 signal overlapping XIST divided by the mean H3K27me3 signal from  
1114 remainder of the entire nucleus. Cells with ratios less than 1.5 were defined as having  
1115 reduced enrichment, as described previously (48). Percentages were calculated for the  
1116 total cell populations, as well as for the nuclear lamina-associated XIST foci and the  
1117 non-lamina-associated foci, as indicated. Total cells assayed = 250 for si-scramble and  
1118 239 for si-Ki-67. Mean and SDs are graphed from three biological replicate experiments.  
1119 p-values were determined by unpaired student's t tests.

1120 C. Analysis of H3K27me3 enrichment on Xi as in panel A, for hTERT-RPE1 cells treated  
1121 with in vitro-diced esiRNAs.

1122 D. Quantitation as in panel B. Total cells assayed= 236 for esi-luciferase, 220 for esi-Ki-67.

- 1123 E. Immuno-FISH analysis of H4K20me1 overlap with XIST in siRNA-treated hTERT-RPE1  
1124 cells. Note that the H4K20me1 signal colocalizing with XIST is reduced in the Ki-67-  
1125 depleted cell.
- 1126 F. Quantitation of the panel E experiments, as in panel B. The total cells assayed = 204 si-  
1127 scramble and 216 for si-Ki-67.
- 1128 G. Analysis of H4K20me1 in cells treated with esiRNAs.
- 1129 H. Quantitation of the panel G experiments. Total cells assayed = 164 for esi-luciferase,  
1130 182 for esi-Ki-67.
- 1131 I. Example of H3K27me3 signal intensity quantification.
- 1132 J. RT-qPCR analysis of XIST RNA levels in hTERT-RPE1 cells.

1133

1134 **Figure 11. H3K27me3 and H4K20me1 staining of the inactive X chromosome was**  
1135 **unaltered upon Ki-67 depletion in 293T cells.** Scale bars, 5  $\mu$ m.

- 1136 A. Immuno-FISH analysis of H3K27me3 overlap with XIST in siRNA-treated 293T cells.  
1137 Note that 293T cells have two Xi chromosomes. In these cells, the H3K27me3 foci  
1138 overlapping XIST remained unchanged upon Ki67 depletion.
- 1139 B. Quantitation of panel A. The total alleles assayed = 136 for si-scramble and 146 for si-  
1140 Ki-67.
- 1141 C, D. Analysis of H3K27me3 in esiRNA-treated 293T cells. Total alleles assayed = 196 for  
1142 esi-luciferase, 198 for esi-Ki-67.
- 1143 E. Immuno-FISH analysis of H4K20me1 overlap with XIST in 293T cells. In these cells, the  
1144 H4K20me1 foci overlapping XIST remained unchanged upon Ki67 depletion.

1145 F. Quantitation of panel E. The total alleles assayed = 180 for si-scramble and 162 for si-  
1146 Ki-67.

1147 G, H. Analysis of H4K20me1 in esiRNA-treated cells. Total alleles assayed = 180 for esi-  
1148 luciferase, 162 for esi-Ki-67.

1149

1150 **Figure 12. Analysis of Cot-1 and Pol II enrichment on Xi in siRNA-treated hTERT-**  
1151 **RPE1 cells.** Scale bars, 5  $\mu$ m.

1152 A-B Localization of Cot-1-hybridizing transcripts relative to XIST domains, when XIST is  
1153 localized away from (A) or at (B) the nuclear lamina. A line scan (white arrow) across  
1154 the XIST signal (green) was used to analyze Cot-1 hybridization levels (red);  
1155 fluorescent densities across the line scan were plotted in the right-hand panels. Cot-1  
1156 RNA was considered to be reduced across the XIST domain when the average Cot-1  
1157 signal overlapping XIST was lower than the average Cot-1 signal across the nucleus.  
1158 The average nucleus Cot-1 signal is depicted in dotted line. In the examples shown  
1159 where Xi was within the cell interior (panel A), Cot-1 RNA was excluded from XIST in  
1160 the si-scramble-treated cell, but not the siKi-67-treated cell. In contrast, siKi-67  
1161 treatment did not affect Cot-1 enrichment on Xi in cells where Xi was at the lamina  
1162 (panel B).

1163 C-D Analysis of RNA Pol II localization (red) relative to XIST (green) when XIST is localized  
1164 away from (panel C) or at (panel D) the nuclear lamina. Exclusion was analyzed as in  
1165 panels A-B.

1166 E. Quantitation of Cot-1 RNA overlap with XIST RNA domains. Mean (and std. dev.)  
1167 percent of cells displaying Cot-1 RNA overlapping XIST foci are plotted from three

1168 biological replicate experiments. The total cells assayed = 404 for si-scramble and 465  
1169 for si-Ki-67. p-values were determined by unpaired student's t tests.

1170 F. Quantitation of percentage of cells showing presence of RNA Pol II at Xist RNA domain.

1171 The total cells assayed = 362 for si-scramble and 367 for si-Ki-67.

1172 G. Immunoblot analysis of Ki67 depletion in siRNA-treated hTERT-RPE1 cells from above.

1173

1174 **Figure 13. Analysis of Cot-1 and Pol II enrichment on Xi in esiRNA-treated hTERT-**

1175 **RPE1 cells.** Analyses were performed as in Figure 12. Scale bars, 5  $\mu$ m.

1176 A, B. Cot-1. Total cells assayed= 178 for esi-luciferase, 180 for esi-Ki-67.

1177 C, D. Pol II. Total cells assayed= 160 for esi-luciferase, 176 for esi-Ki-67.

1178 E. Quantitation of Cot-1 RNA overlap with XIST RNA domains from panels A-B.

1179 F. Quantitation of RNA Pol II at Xist RNA domain from panels C-D.

1180 G. Immunoblot analysis of Ki-67 depletion in esiRNA-treated hTERT-RPE1 cells from

1181 above.

1182

1183 **Figure 14. Some aspects of Xi structure and function were resistant to Ki-67**

1184 **depletion.**

1185 A. XIST cloud in hTERT-RPE1 cells has similar appearance regardless of Ki-67 depletion.

1186 Cells were treated with the indicated siRNAs for 72 hrs and analyzed by RNA-FISH to

1187 localize XIST (green) and DAPI staining (blue). Scale bar: 10  $\mu$ m.

1188 B. Average RNA levels of X linked genes did not change upon Ki-67 depletion in hTERT-

1189 RPE1 cells. log<sub>2</sub> FPKM analyses of RNA-seq data from two biological replicates for the

1190 two indicated siRNA treatments are shown.

1191 C-H. MacroH2A enrichment at the XIST domain was not altered upon Ki-67 depletion.  
1192 hTERT-RPE1 cells were treated with siRNAs (C-E) or in vitro-diced esiKi-67 (F-H) for 72  
1193 hrs. Panels C, F: Cells were analyzed by immuno-RNA-FISH to localize XIST (green) and  
1194 macroH2A (red). Scale bar: 10  $\mu$ m. Panels D, G: Quantitation of cells that displayed reduced  
1195 macroH2A staining is shown. Total cells assayed= 248 for si-scramble, 291 for siKi-67, 218  
1196 for esi-luciferase, 236 for esiKi-67. Panels E, H: immunoblot analyses of Ki-67 depletions.  
1197  
1198

1199 **Figure 15. Depletion of Ki-67 redistributed the Xi chromosome within hTERT-RPE1**  
1200 **but not 293T nuclei.** Scale bars, 10  $\mu$ m.

1201 A. Fluorescence microscopy images of representative hTERT-RPE1 cells treated either  
1202 with scramble control or Ki-67-targeted siRNAs as indicated. Cells were analyzed by RNA-  
1203 FISH to detect XIST RNA (green) marking the Xi, and by immunofluorescence with anti-  
1204 fibrillar antibodies (red) to label nucleoli. DNA was stained with DAPI (blue).

1205 B. Quantification of XIST association frequencies from panel A experiments. XIST  
1206 associations with the indicated locations were counted; “total nucleolar” indicates the sum  
1207 of XIST signals that are exclusively nucleolar plus those that also are on the nuclear  
1208 periphery. Three biological replicate experiments were performed with mean percentage  
1209 association and SDs graphed. Total cells assayed = 363 for si-scramble, 376 for siKi-67.  
1210 Holm-Sidak corrected p-values comparing si-scramble and siKi-67 treatments are  
1211 indicated, with p-values < 0.05 in red.

1212 C. Fluorescence microscopy images of representative hTERT-RPE1 cells treated either  
1213 with luciferase- or Ki-67-targeted esiRNAs as indicated. Cells were stained as in panel A.

1214 D. Quantification of association frequencies from panel C experiments. Total cells assayed  
1215 = 348 for esi-luciferase, 391 for esiKi-67.

1216 E. Fluorescence microscopy images of representative 293T cells treated either with  
1217 scramble control or Ki-67-targeted siRNAs.

1218 F. Quantification of XIST association frequencies from panel E experiments. Total alleles  
1219 assayed = 272 for si-scramble, 298 for siKi-67. Holm-Sidak adjusted p-values comparing  
1220 association frequencies were  $> 0.97$  for all comparisons.

1221 G. Fluorescence microscopy images of representative 293T cells as panel E, except that  
1222 cells were treated with in vitro-diced esiRNAs as depletion reagents.

1223 H. Quantitation of XIST association frequencies from panel G experiments.  
1224 Total alleles assayed = 250 for esi-luciferase, 270 for esiKi-67. Holm-Sidak adjusted p-  
1225 values comparing association frequencies were  $> 0.98$  for all comparisons.

1226 Panels I-L: Frequencies of Xi associations versus time. All associations were measured in  
1227 HU-synchronized cells as in Fig. 7A-B, with the averages and std. dev. from 3 independent  
1228 experiments. At each time point,  $>300$  cells were counted.

1229 I. Xi-nucleolar only associations (Xi chromosomes associated with nucleoli but not lamina).  
1230 J. Xi chromosomes associated with both the lamina and nucleoli simultaneously.

1231 K. Xi-lamina only associations (Xi chromosomes associated with lamina but not nucleoli).  
1232 Note that Xi-nucleolar associations (panels I-J) peak and Xi-lamina only (panel K)  
1233 associations reach a minimum when the majority of cells are in mid-late S phase, which is  
1234 delayed in Ki67-depleted cells by 2 hr.

1235 L. Xi-total laminar associations (Xi chromosomes associated either with the lamina or with  
1236 both lamina and nucleoli simultaneously).

1237 **Legends for Supplemental tables**

1238 **Supplemental Table 1. Top reactomes detected in siKi-67 RNAseq data.**

1239 Reactome analysis of transcriptional changes reveals functional grouping of pathways  
1240 altered upon Ki67 depletion in hTERT-RPE1 cells. Table shows all pathways enriched with  
1241 p value <  $5 \times 10^{-5}$ . Log2FC value for selected DNA replication-related genes are shown at  
1242 the bottom

1243

1244 **Supplemental Table 2. Complete RNA-seq data from siRNA-treated hTERT-RPE1**  
1245 **cells.**

1246 Each transcript that mapped uniquely to the genome is listed. Value 1 is the mean FPKM  
1247 from two biological replicates in si-scramble-treated hTERT-RPE1 cells. Value 2 is the  
1248 mean FPKM from two biological replicates in siKi-67-treated hTERT-RPE1 cells. Fold  
1249 change is the ratio of value 2 over value1 in log2 range. Status, Test\_stat, p\_value and q\_  
1250 value are generated from Cufflinks 2.2.1(1). Status: "OK" indicates a successful test,  
1251 "NOTEST" indicates insufficient alignments for testing. Test\_stat: displays the significance  
1252 of the observed change in FPKM. p\_value: uncorrected p-values of the test statistic.  
1253 q\_value: p-value adjusted by the false discovery rate (FDR). The criteria of significance is  
1254 defined as  $q < 0.05$ .

1255

1256 **Supplemental Table 3. Comparison of our si-Ki-67 RNAseq data to meta-analyses of cell**  
1257 **cycle regulators (2). Separate sheets for the Cell cycle, E2F, and DREAM data are included.**  
1258 Cell cycle: The "Adjusted Cell Cycle Score" equals the Cell cycle expression score (Negative  
1259 for G1/S-expressed genes, positive for G2/M-expressed genes, Table S10 in (2)), + 1 point

1260 for regulation by G2/M regulator MMB/FOXM1, -1 point for regulation by G1/S regulators  
1261 Rb/E2F. “si-Ki-67 log2FC” and “q-values” are from the RNAseq analysis of hTERT-RPE1  
1262 cells (Figure 1). Genes with the same Adjusted Cell Cycle score were analyzed in the same  
1263 bin. “Significant upregulation” was TRUE if the  $\log_2FC > 0$  AND  $q < 0.05$ . “Significant  
1264 downregulation” was TRUE if  $\log_2FC < 0$  AND  $q < 0.05$ . Benjamini-adjusted p-values (3) for  
1265 these enrichments were calculated and graphed in Figure 8.

1266 E2F: The Rb/E2F binding scores come from Table S9 of (2).

1267 DREAM: The DREAM binding scores come from Table S7 of (2).

1268

1269 **Supplemental Table 4. Analysis of X-linked SNPs in the RNAseq data.**

1270 The RNAseq analyses of hTERT-RPE1 cells were compared to SNPs from the genome  
1271 sequence these cells (4). We also compared these data to previous analysis of escapers  
1272 from Xi silencing (5, 6).

1273

1274 **Supplemental Table 5. Oligonucleotides used in this study**

1275 Table shows primers used for RT-PCR or for generating esiRNA.

1276

1277

1278

1279

1280

1281

1282



1283

1284   References for Supplemental material

- 1285   1.    **Trapnell C, Williams B a, Pertea G, Mortazavi A, Kwan G, van Baren MJ, Salzberg**  
1286       **SL, Wold BJ, Pachter L.** 2010. Transcript assembly and abundance estimation from  
1287       RNA-Seq reveals thousands of new transcripts and switching among isoforms. *Nat*  
1288       *Biotechnol* **28**:511–515.
- 1289   2.    **Fischer M, Grossmann P, Padi M, DeCaprio JA.** 2016. Integration of TP53, DREAM,  
1290       MMB-FOXM1 and RB-E2F target gene analyses identifies cell cycle gene regulatory  
1291       networks. *Nucleic Acids Res* **44**:6070–6086.
- 1292   3.    **Wright SP.** 1992. Adjustd p-values for simultaneous inference. *Biometrics* **48**:1005–  
1293       1013.
- 1294   4.    **Passerini V, Ozeri-Galai E, de Pagter MS, Donnelly N, Schmalbrock S,**  
1295       **Kloosterman WP, Kerem B, Storchová Z.** 2016. The presence of extra  
1296       chromosomes leads to genomic instability. *Nat Commun* **7**:10754.
- 1297   5.    **Carrel L, Willard HF.** 2005. X-inactivation profile reveals extensive variability in X-  
1298       linked gene expression in females. *Nature* **434**:400–404.
- 1299   6.    **Zhang Y, Castillo-Morales A, Jiang M, Zhu Y, Hu L, Urrutia AO, Kong X, Hurst LD.**  
1300       2013. Genes that escape X-inactivation in humans have high intraspecific variability  
1301       in expression, are associated with mental impairment but are not slow evolving. *Mol*  
1302       *Biol Evol* **30**:2588–2601.

1303

1304

1305

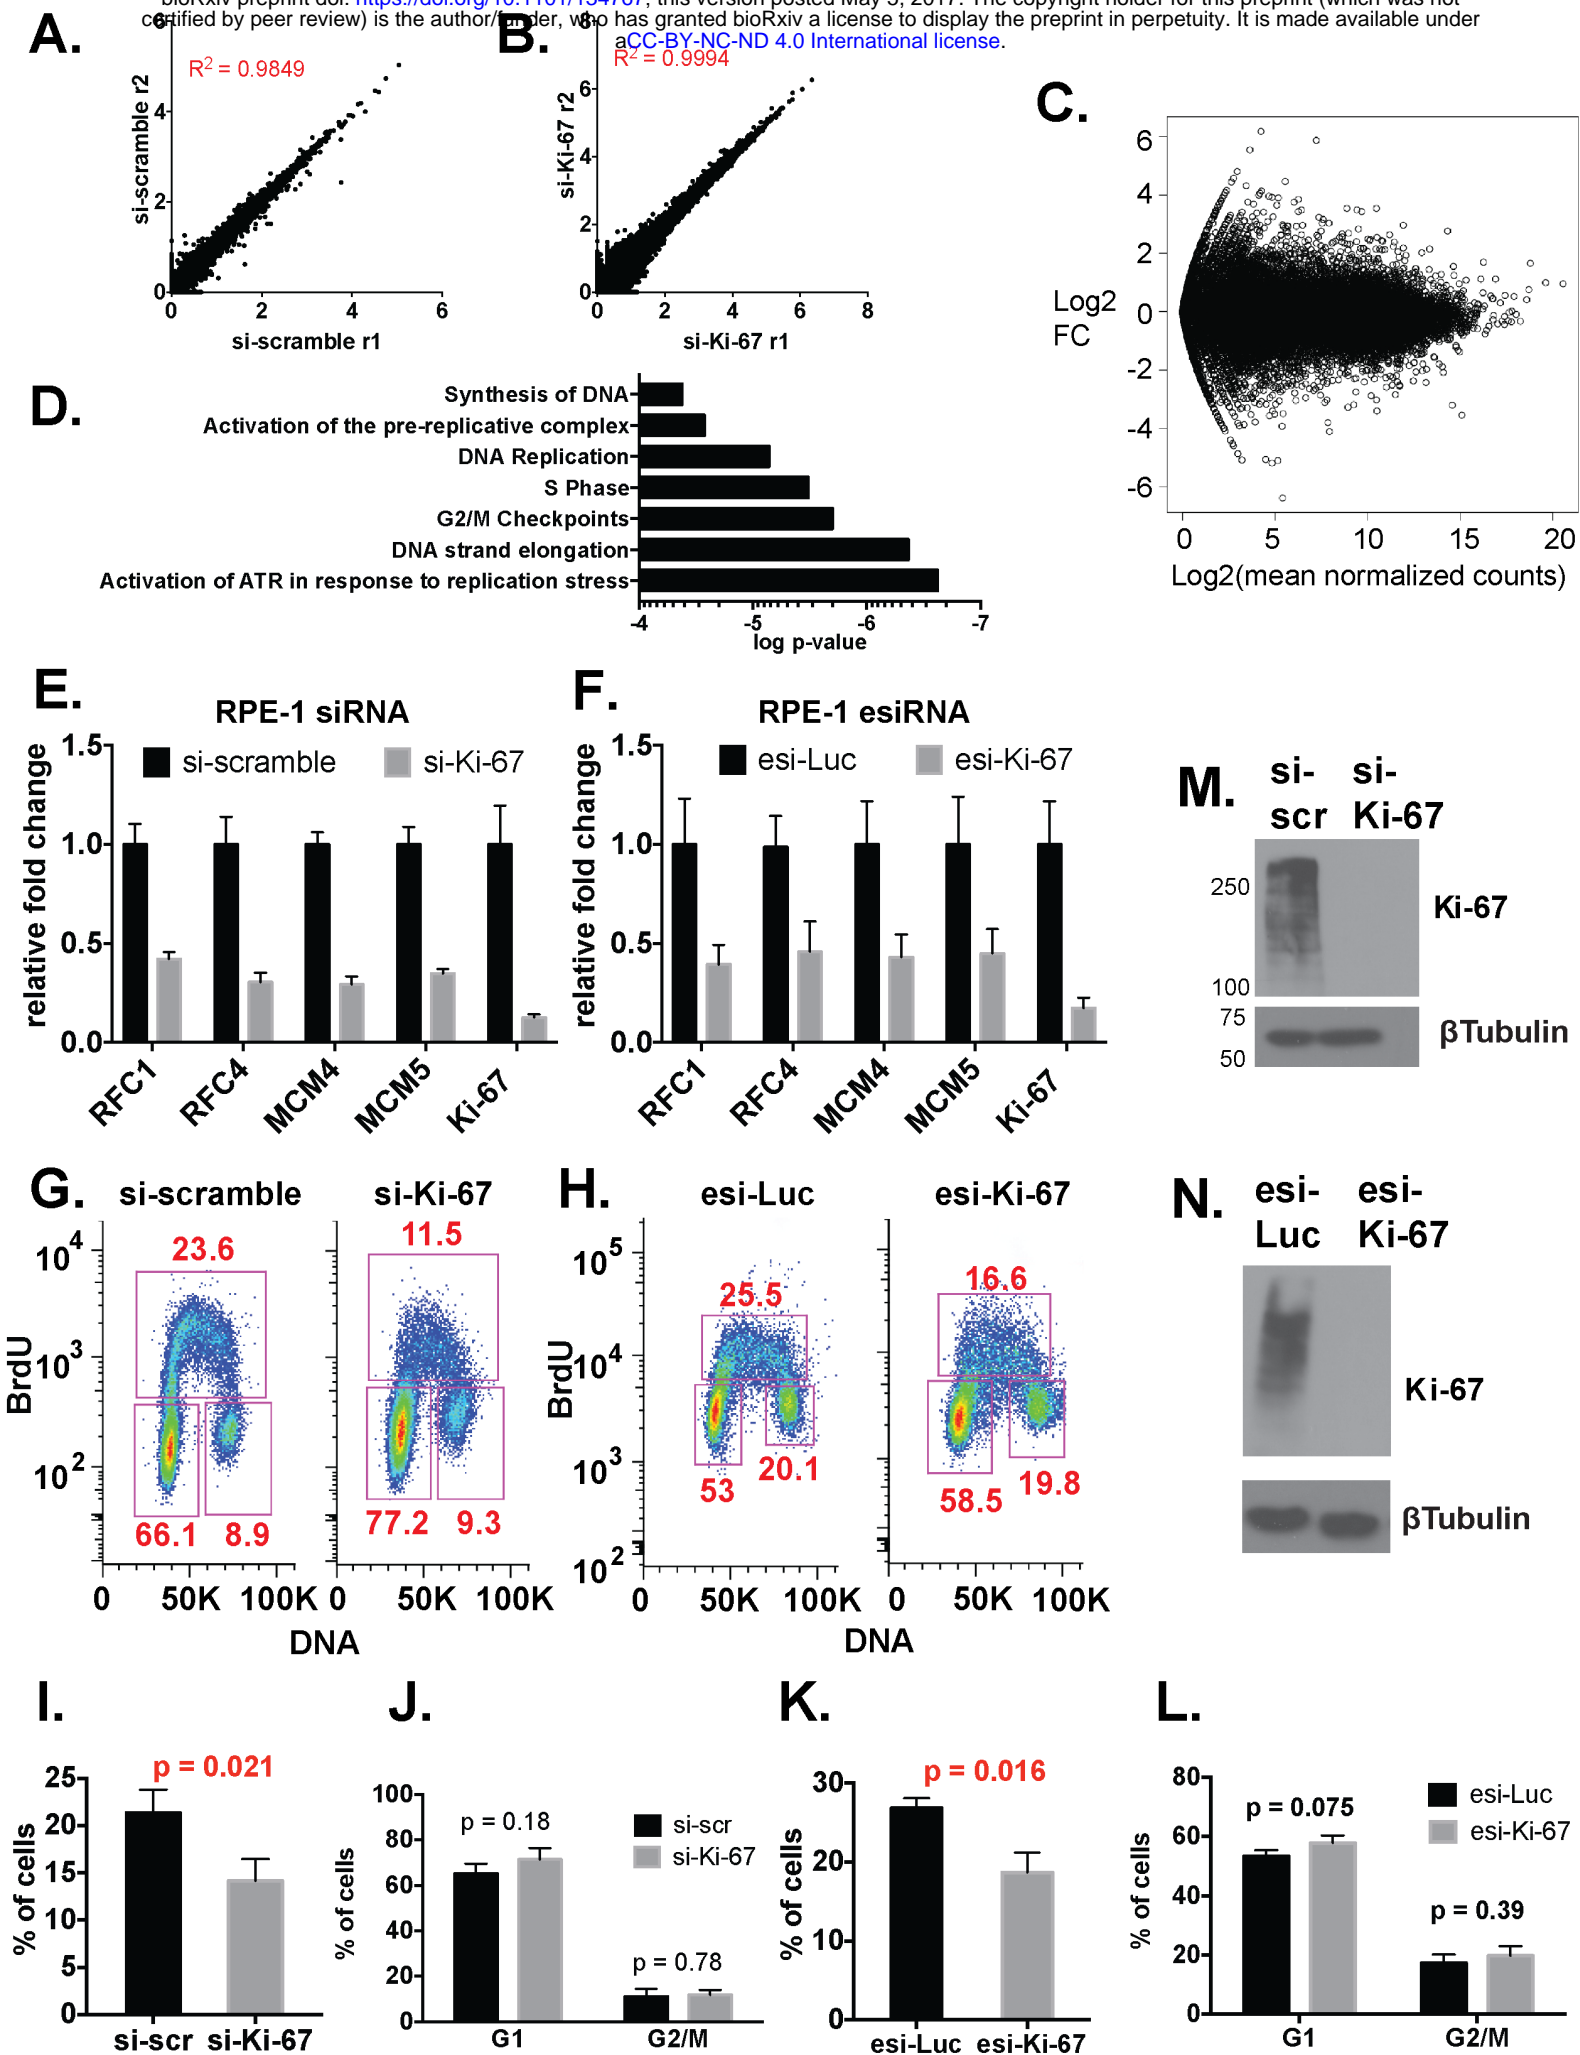

**A.**

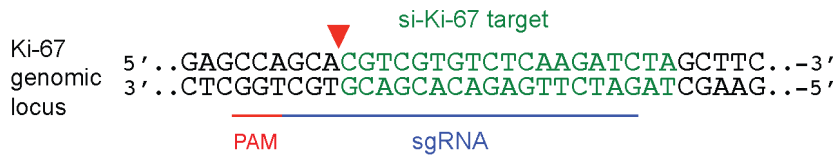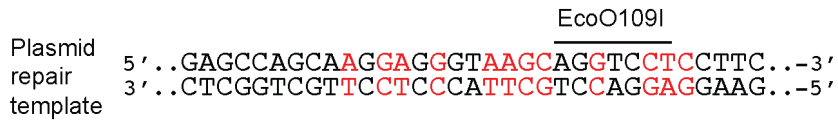

**B.**

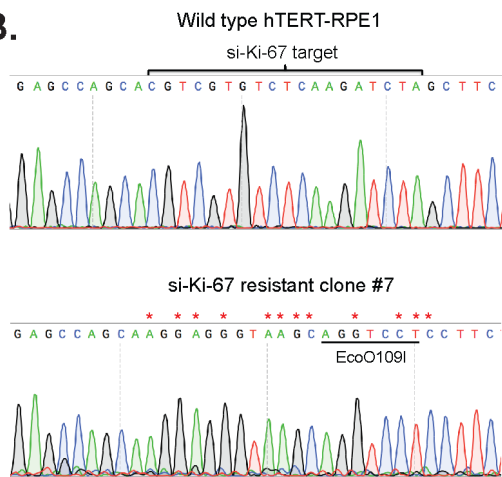

**C.**

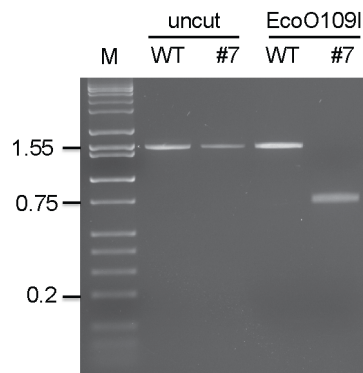

**D.**

|           |   |   |   |   |   |
|-----------|---|---|---|---|---|
| si-scr    | - | + | - | - | - |
| si-Ki-67  | - | - | + | - | - |
| esi-Luc   | - | - | - | + | - |
| esi-Ki-67 | - | - | - | - | + |

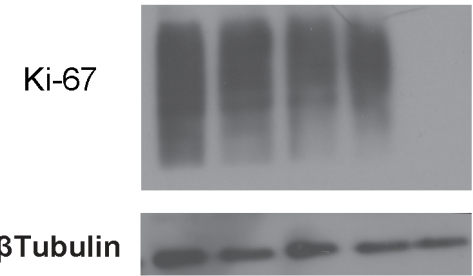

**E. siRNA-resistant hTERT-RPE1**

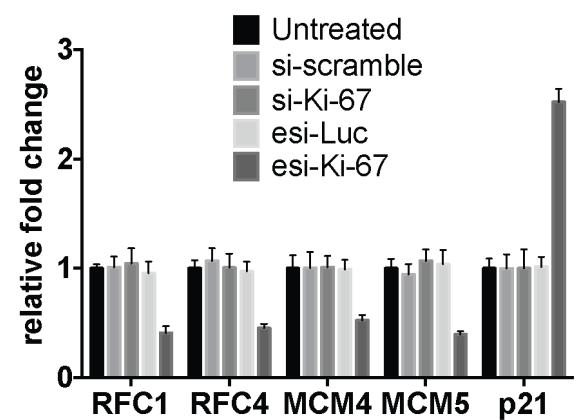

**F. WI38**

**G. IMR90**

**H. hTERT-BJ**

**I. HFF**

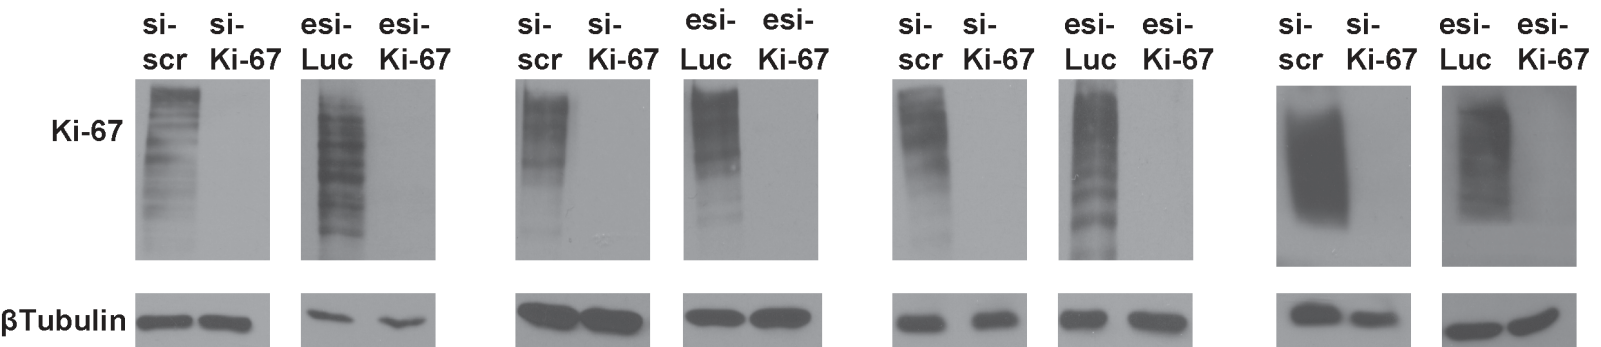

**J. HeLa**

**K. U2OS**

**L. 293T**

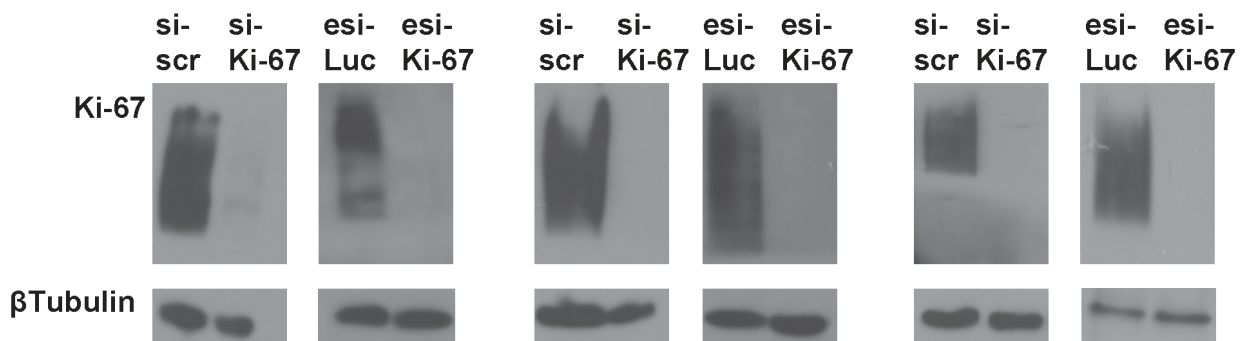

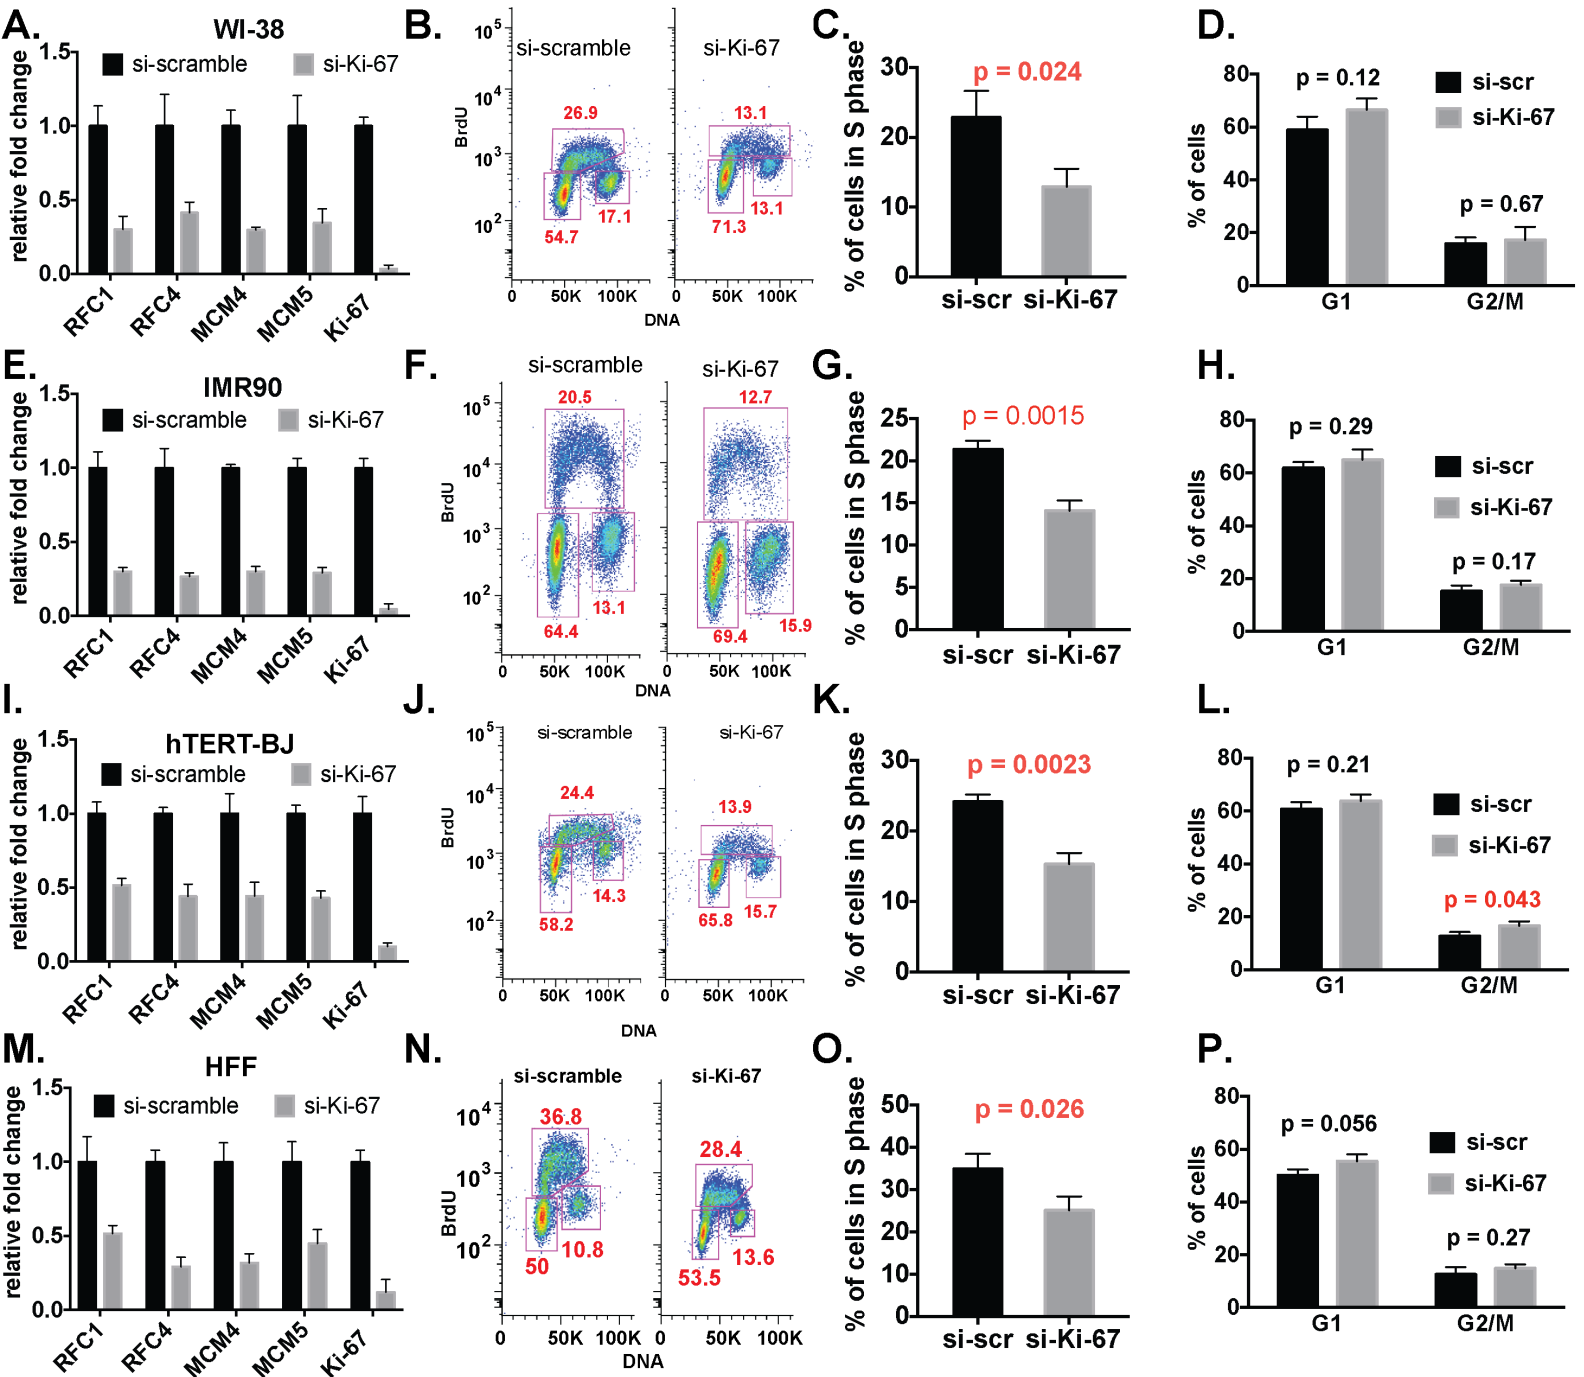

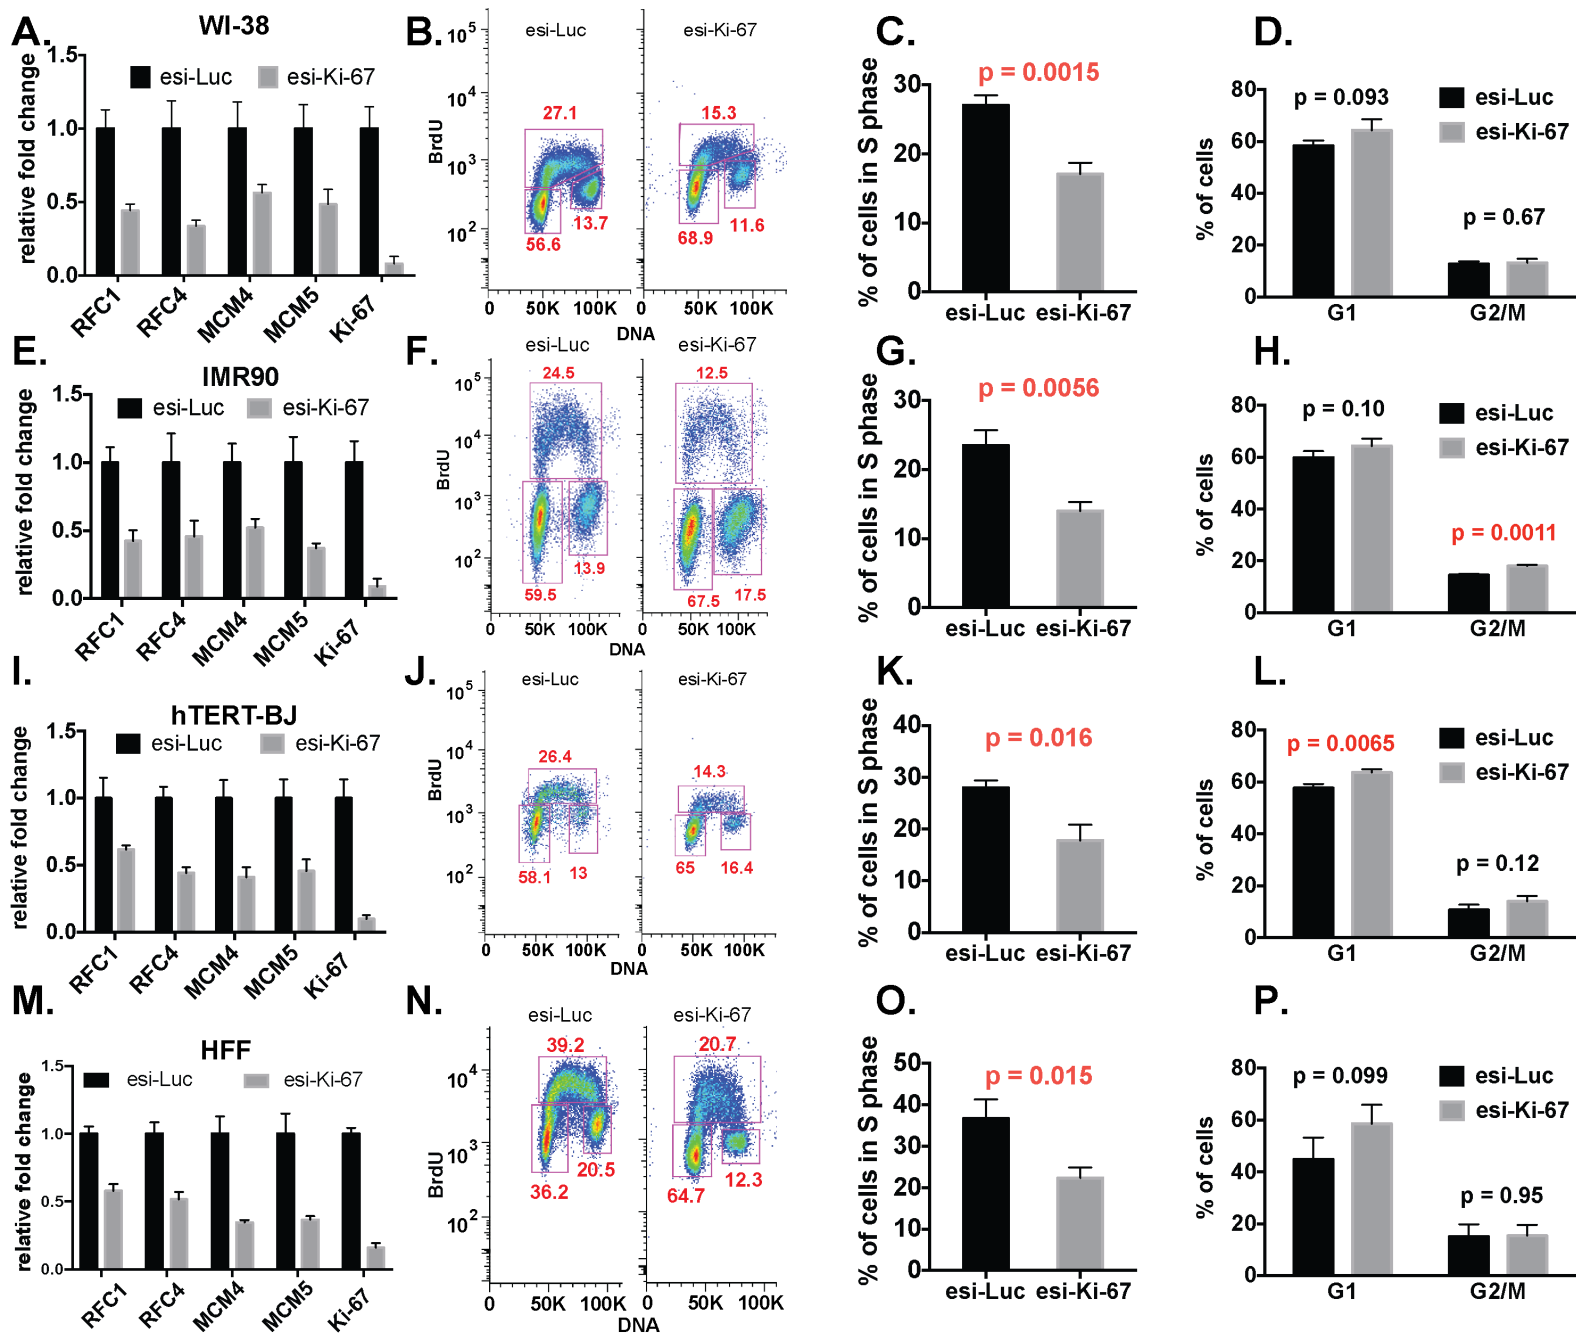

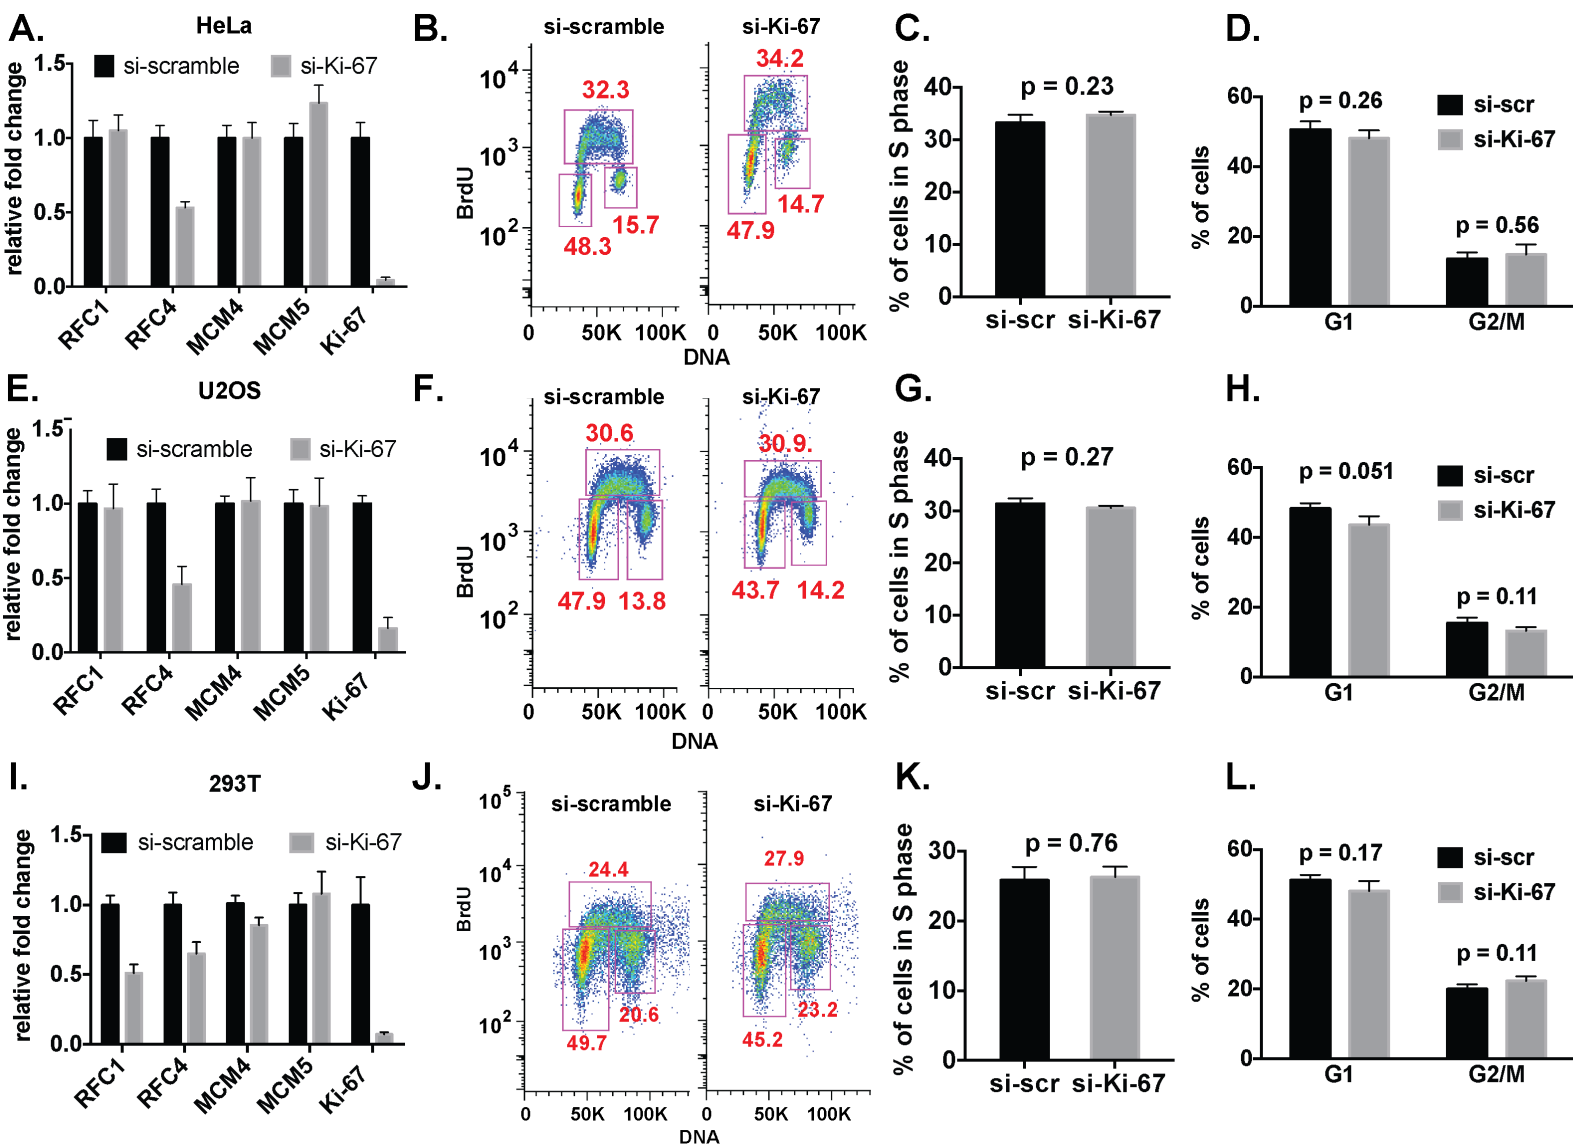

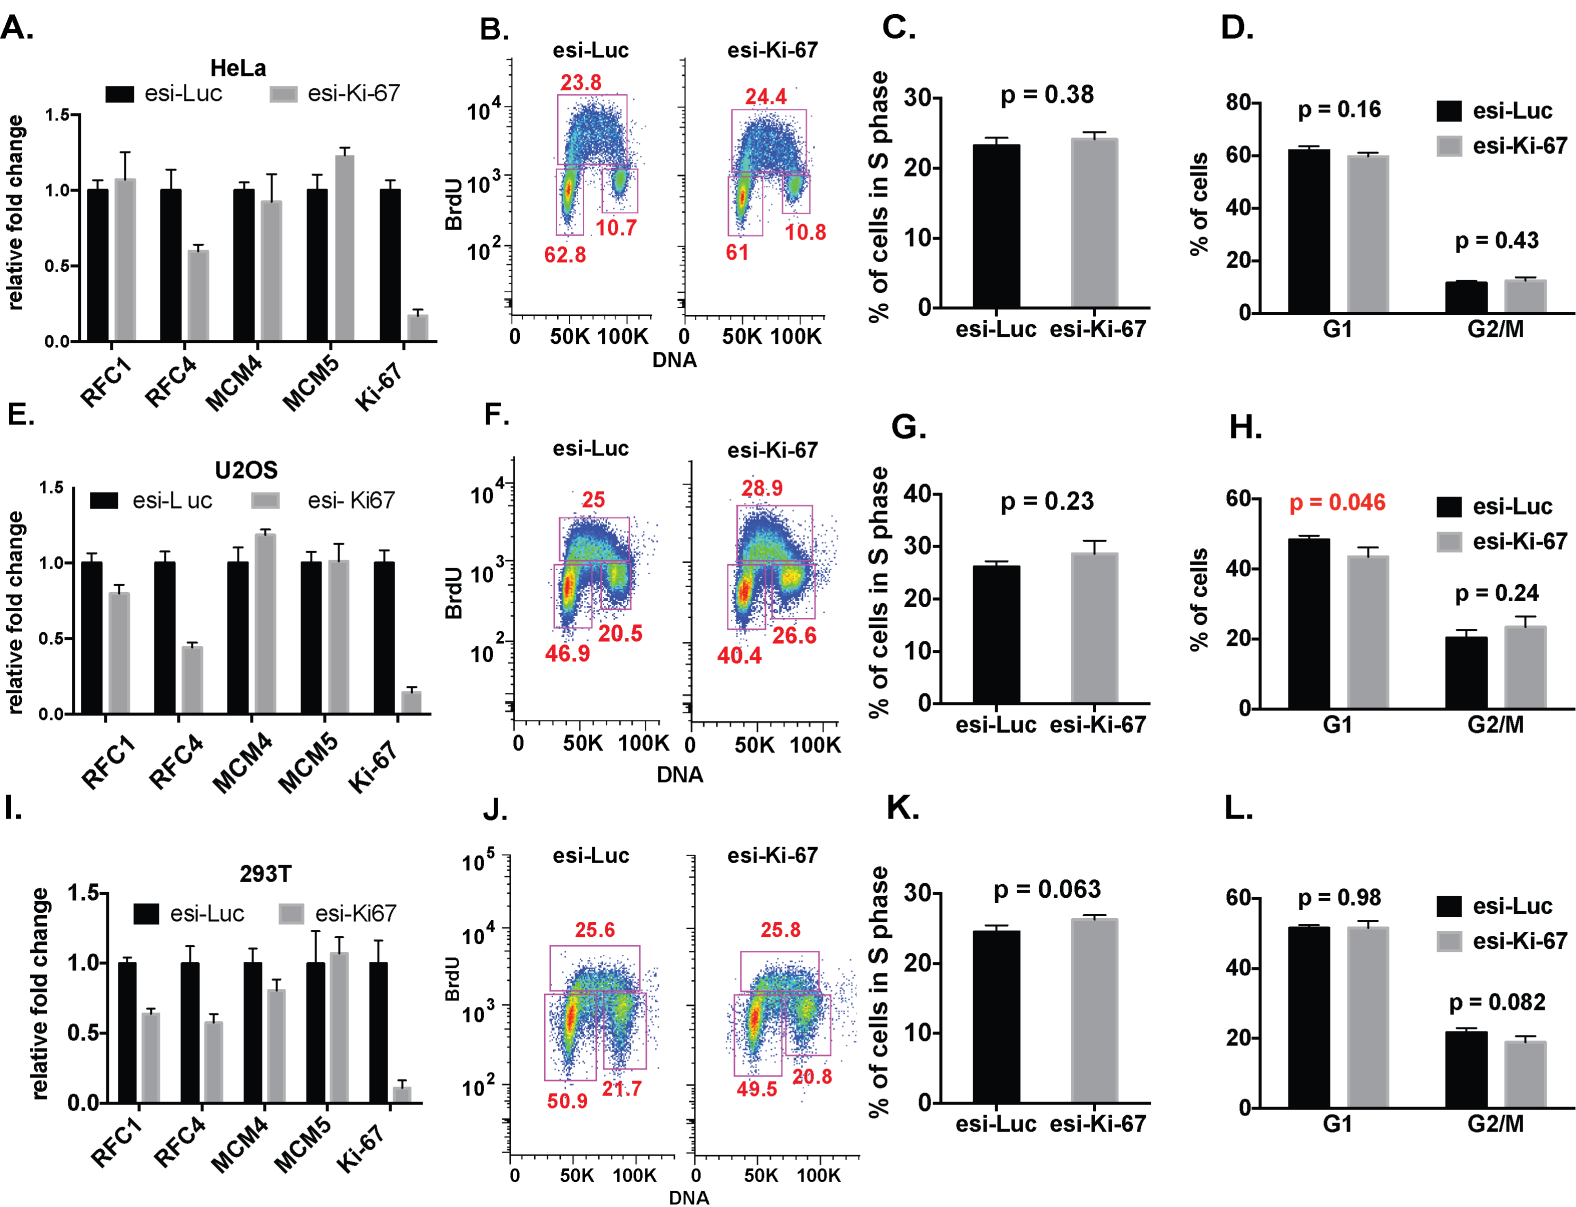

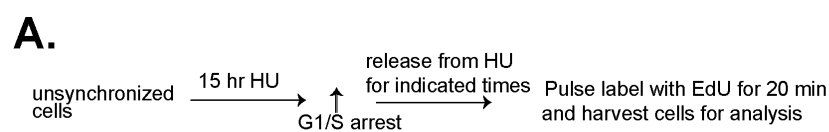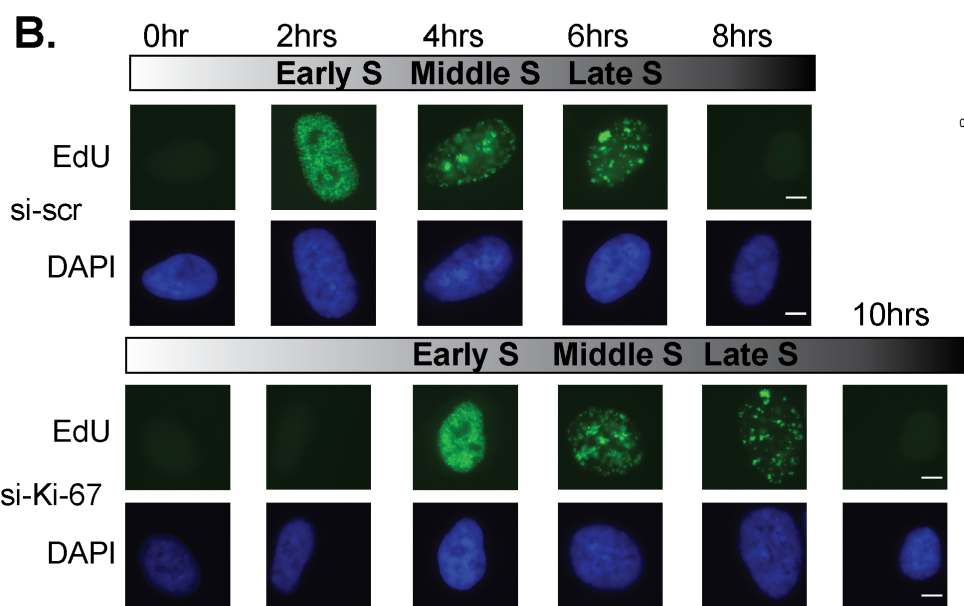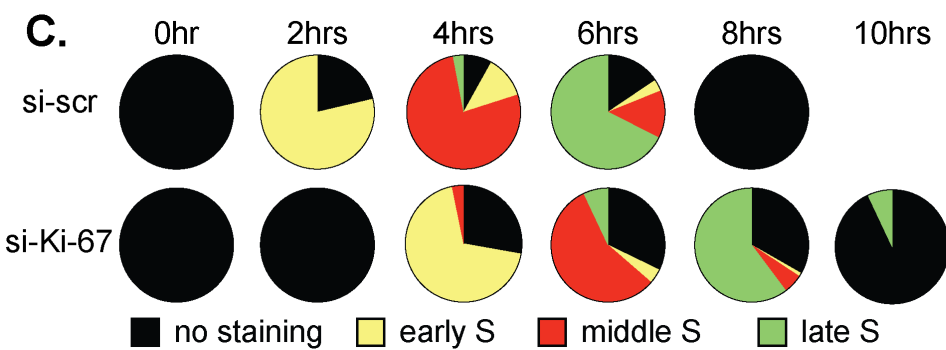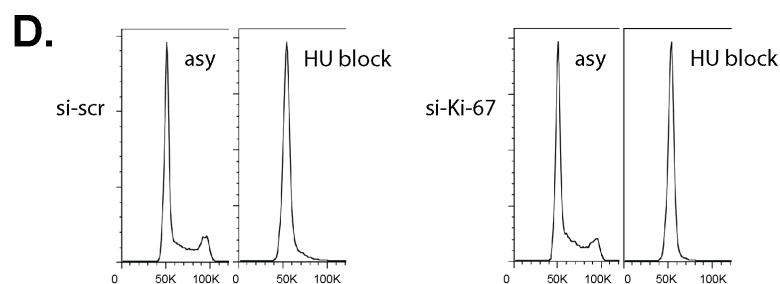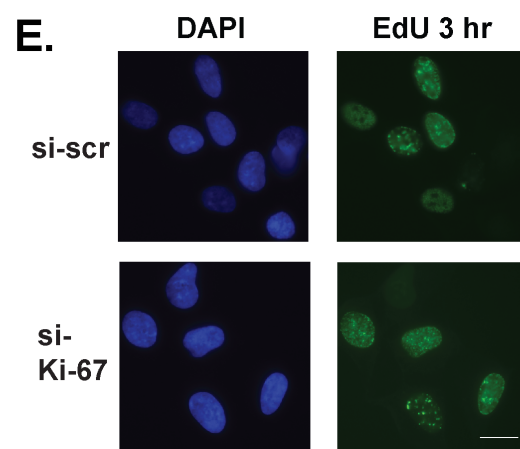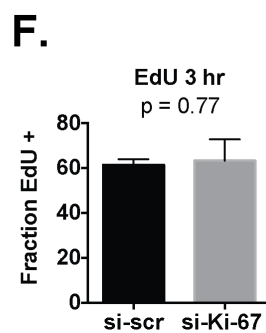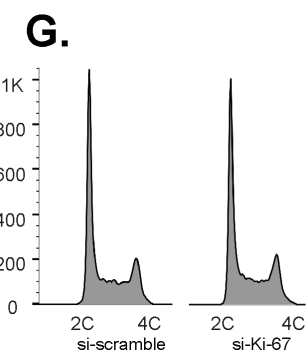



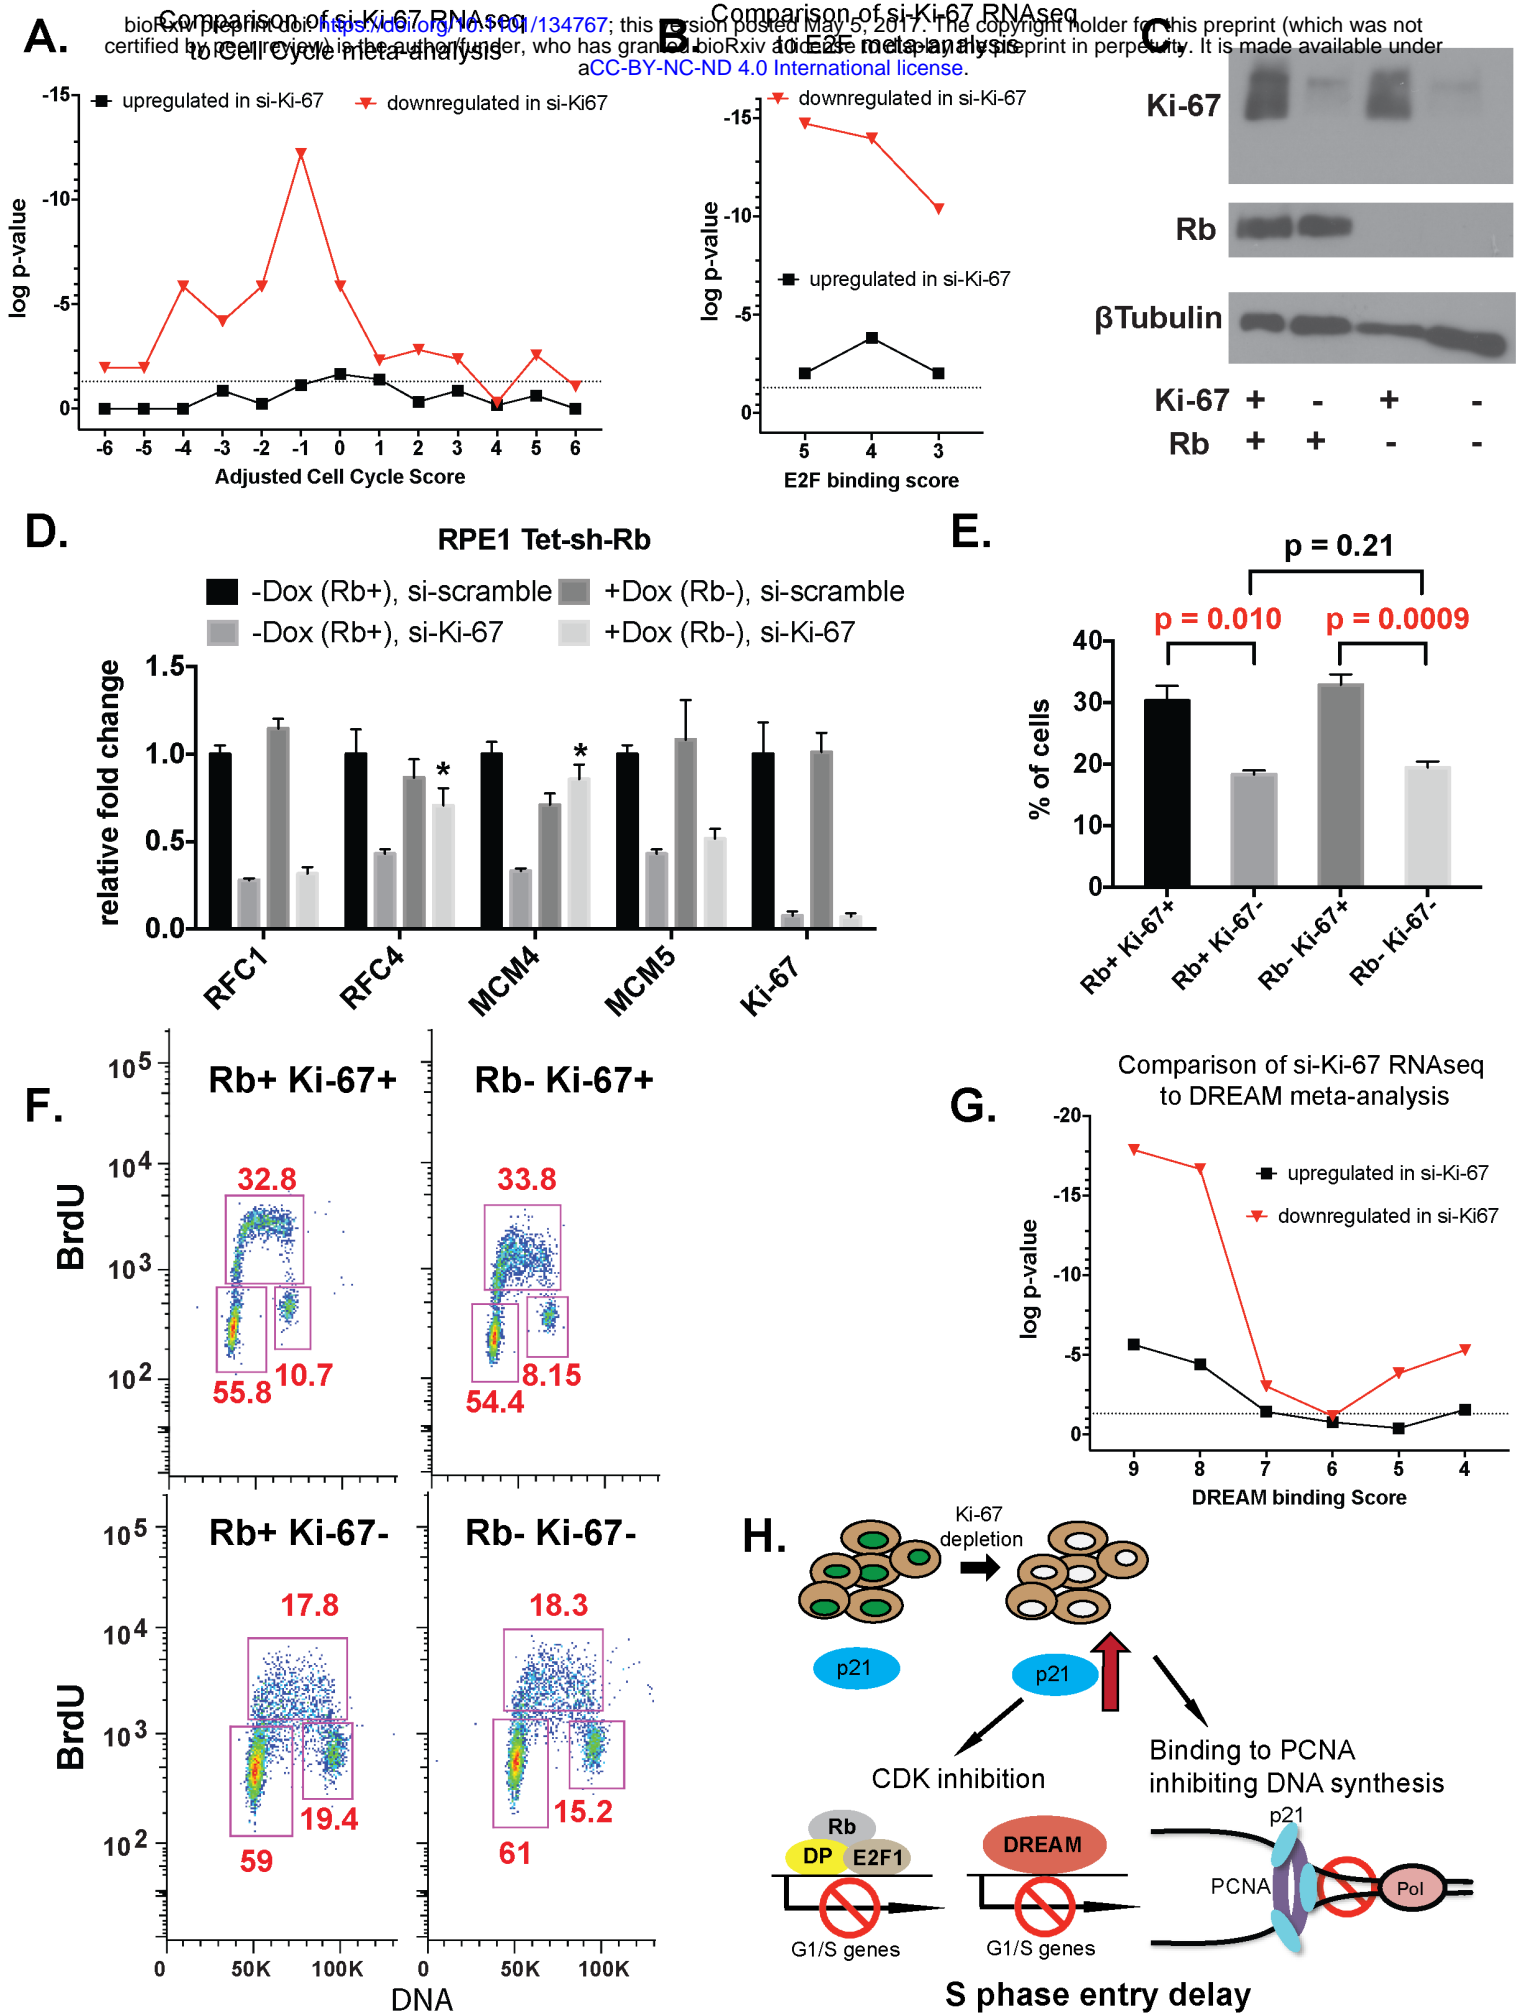

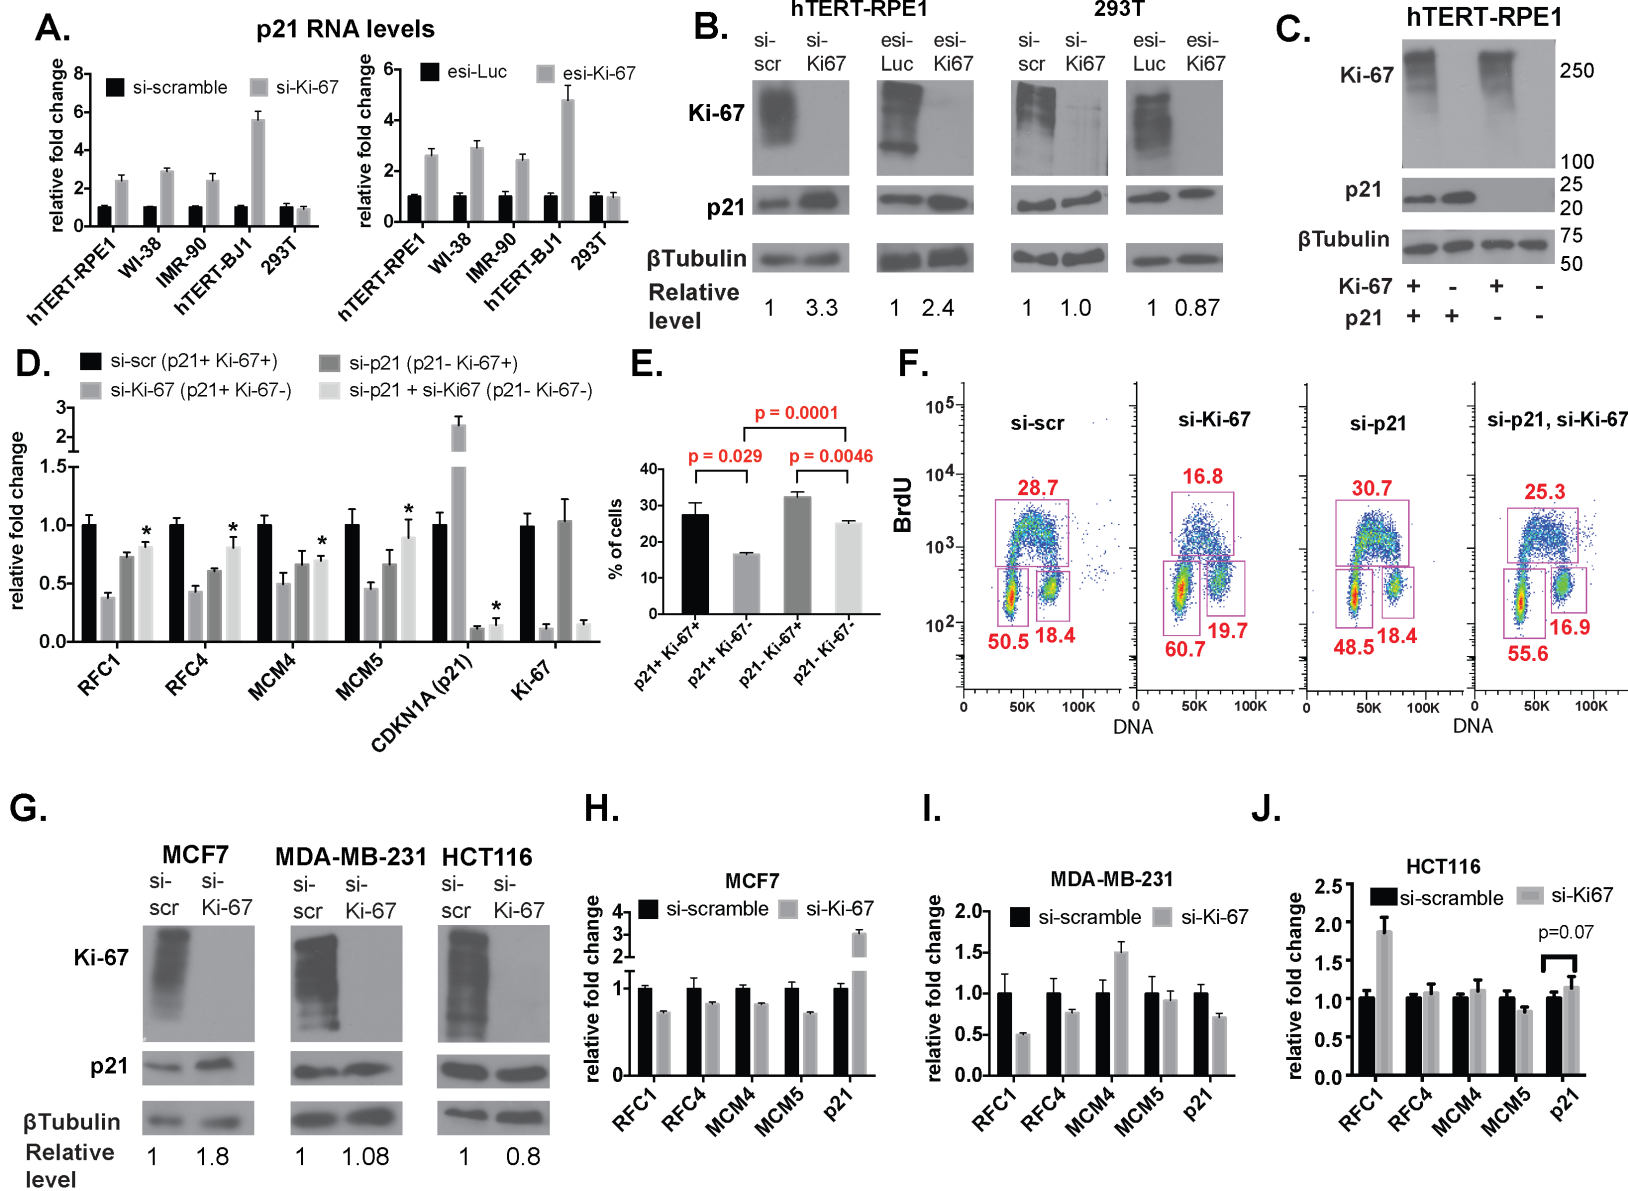

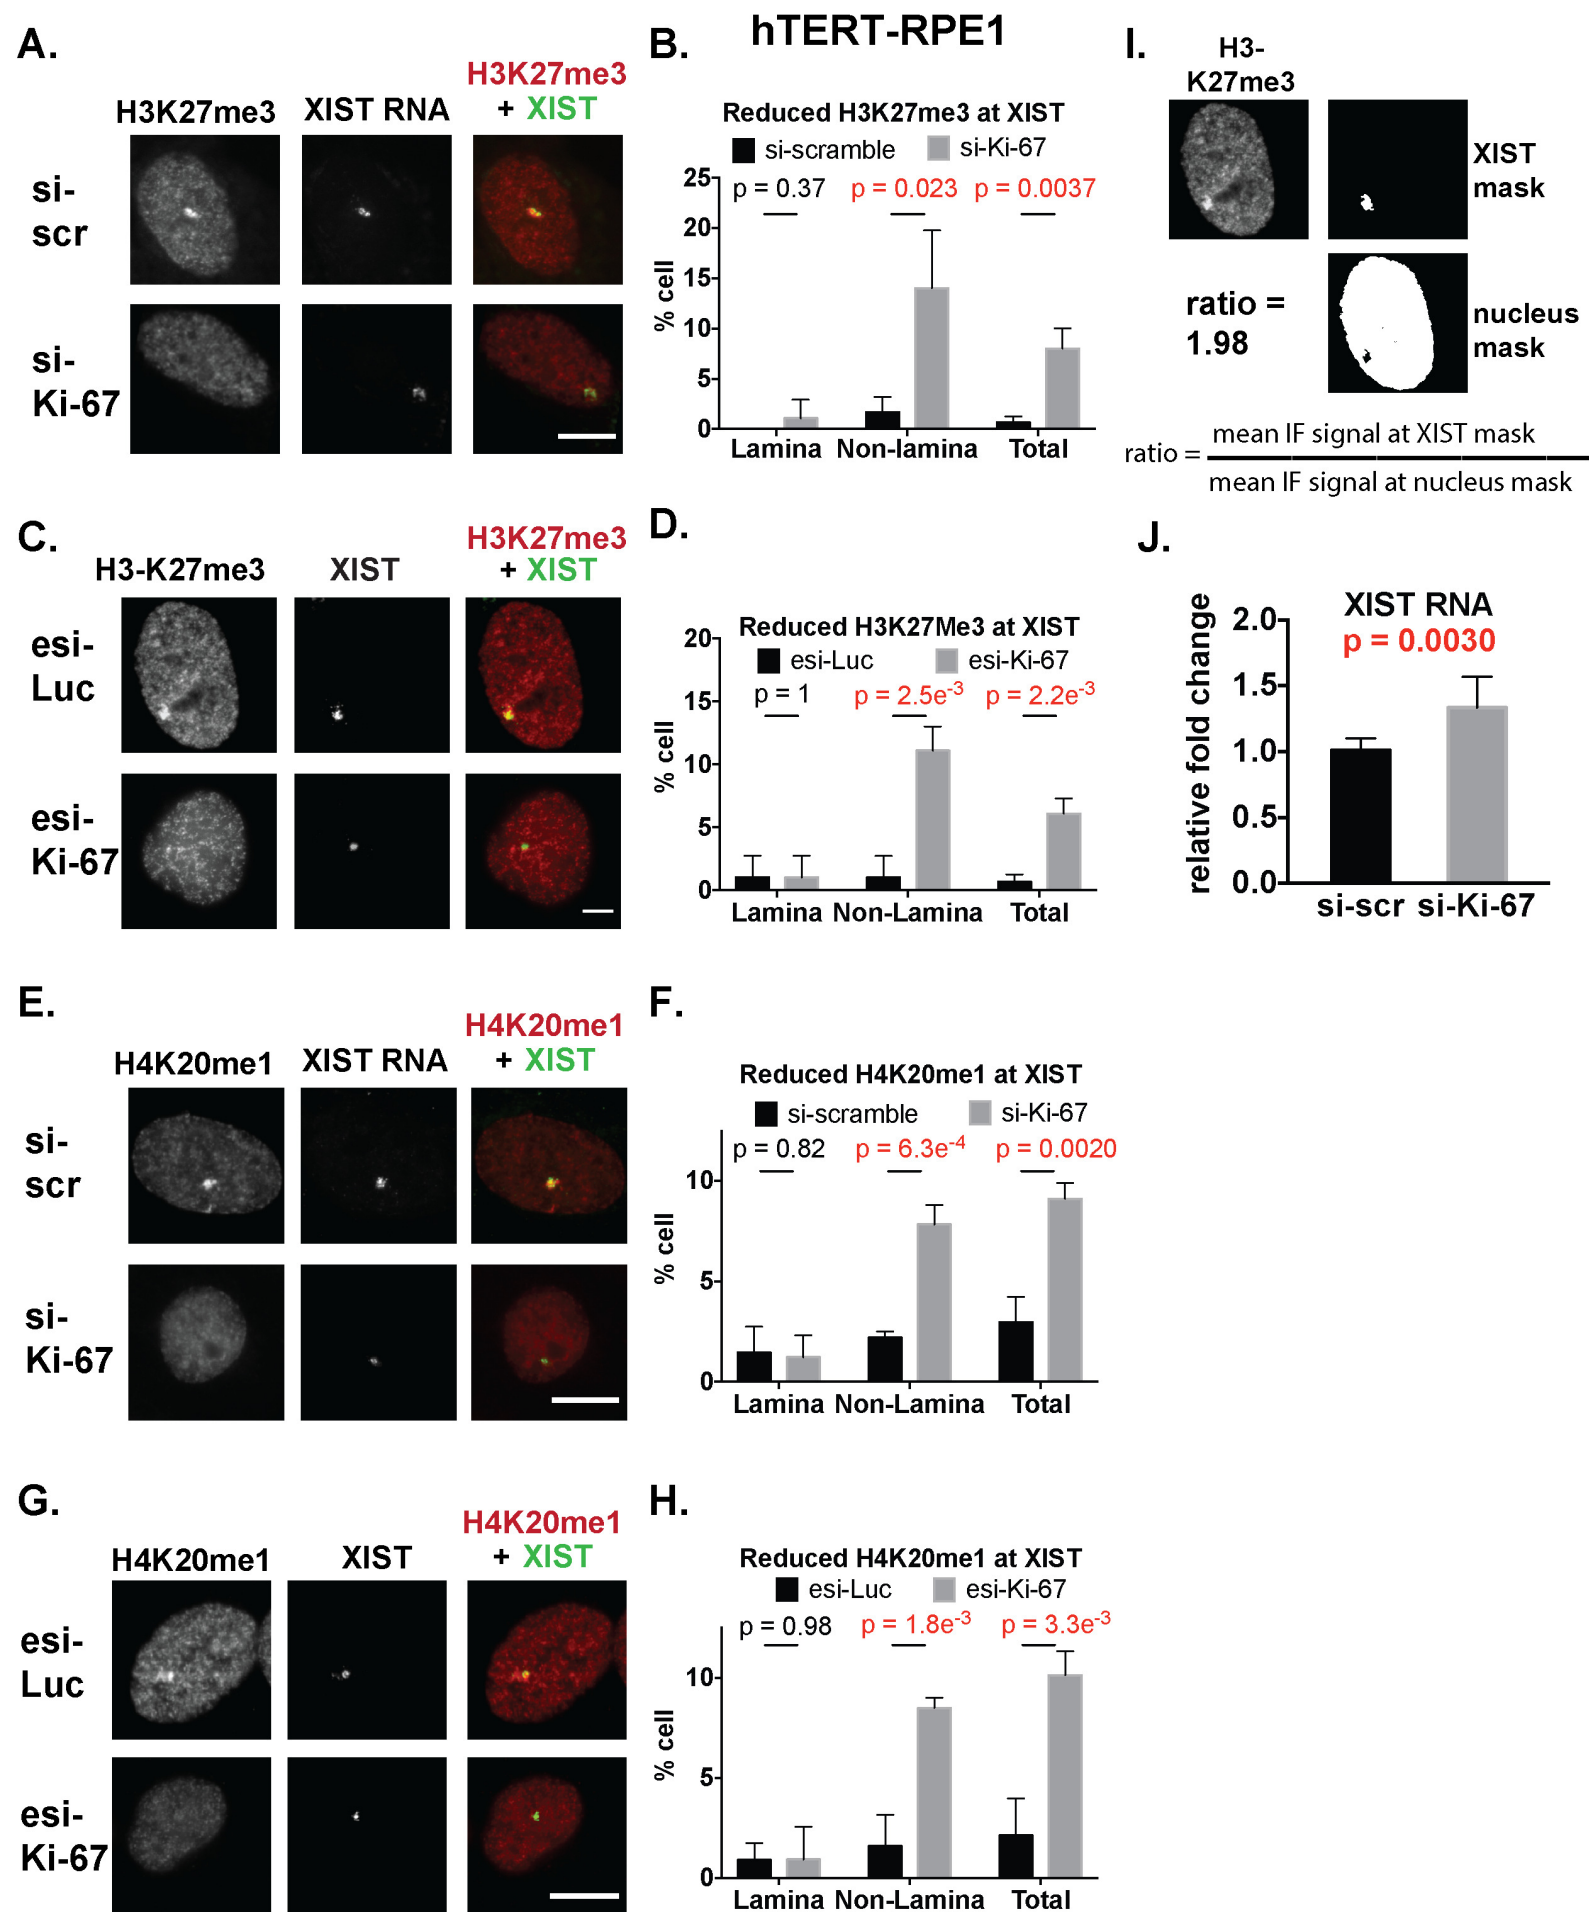

**A.** H3K27me3 XIST RNA + XIST

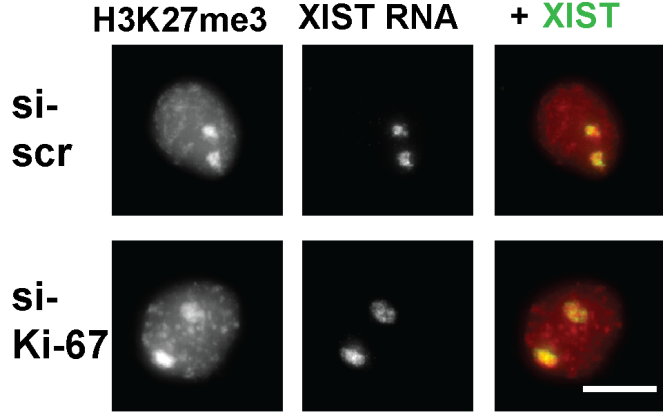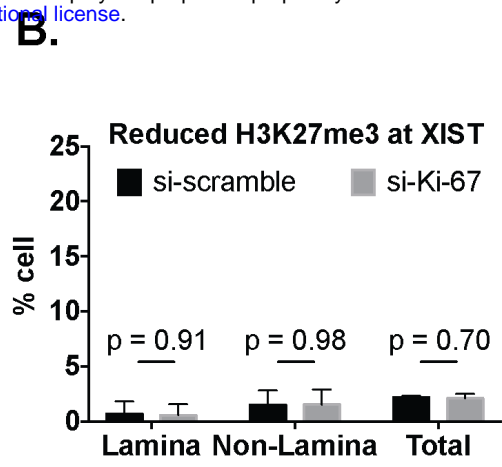

**C.** H3-K27me3 XIST + XIST

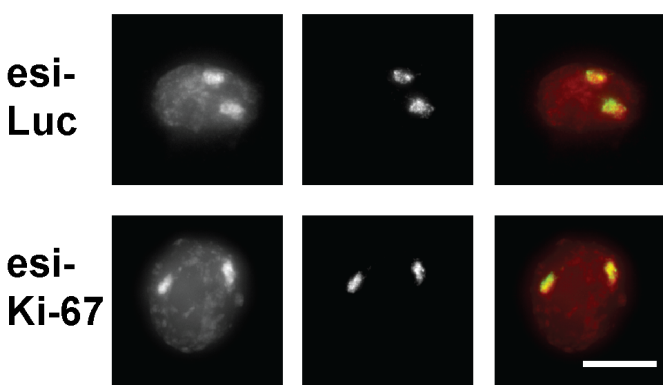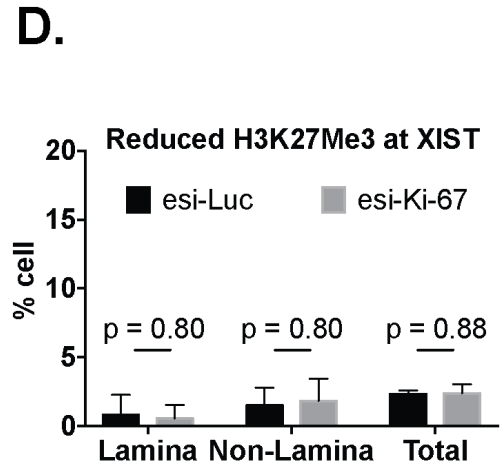

**E.** H4K20me1 XIST RNA + XIST

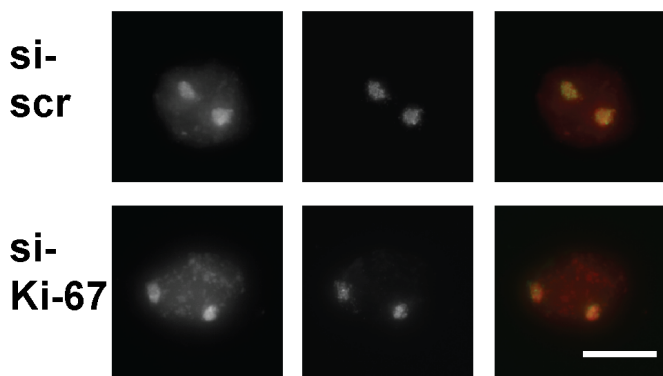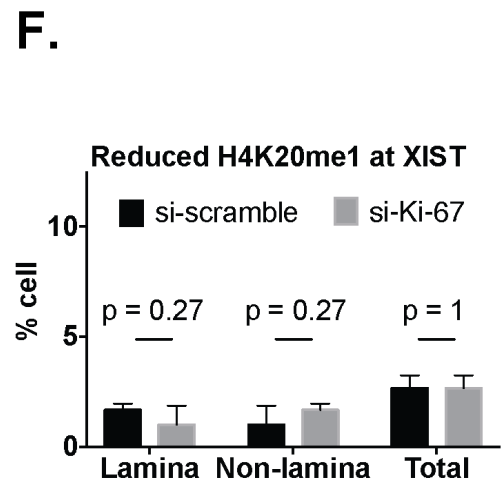

**G.** H4K20me1 XIST + XIST

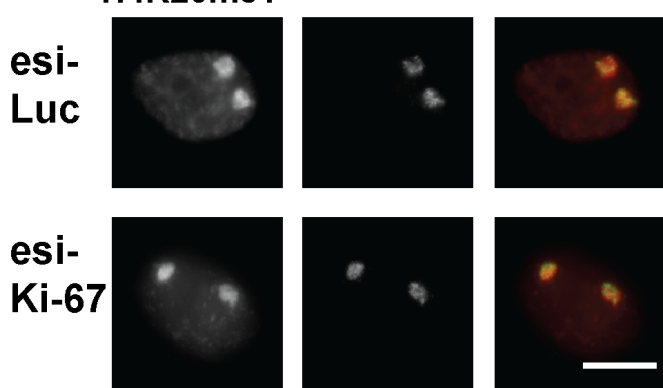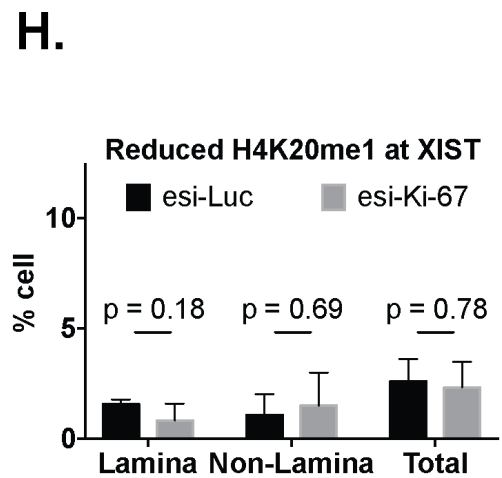

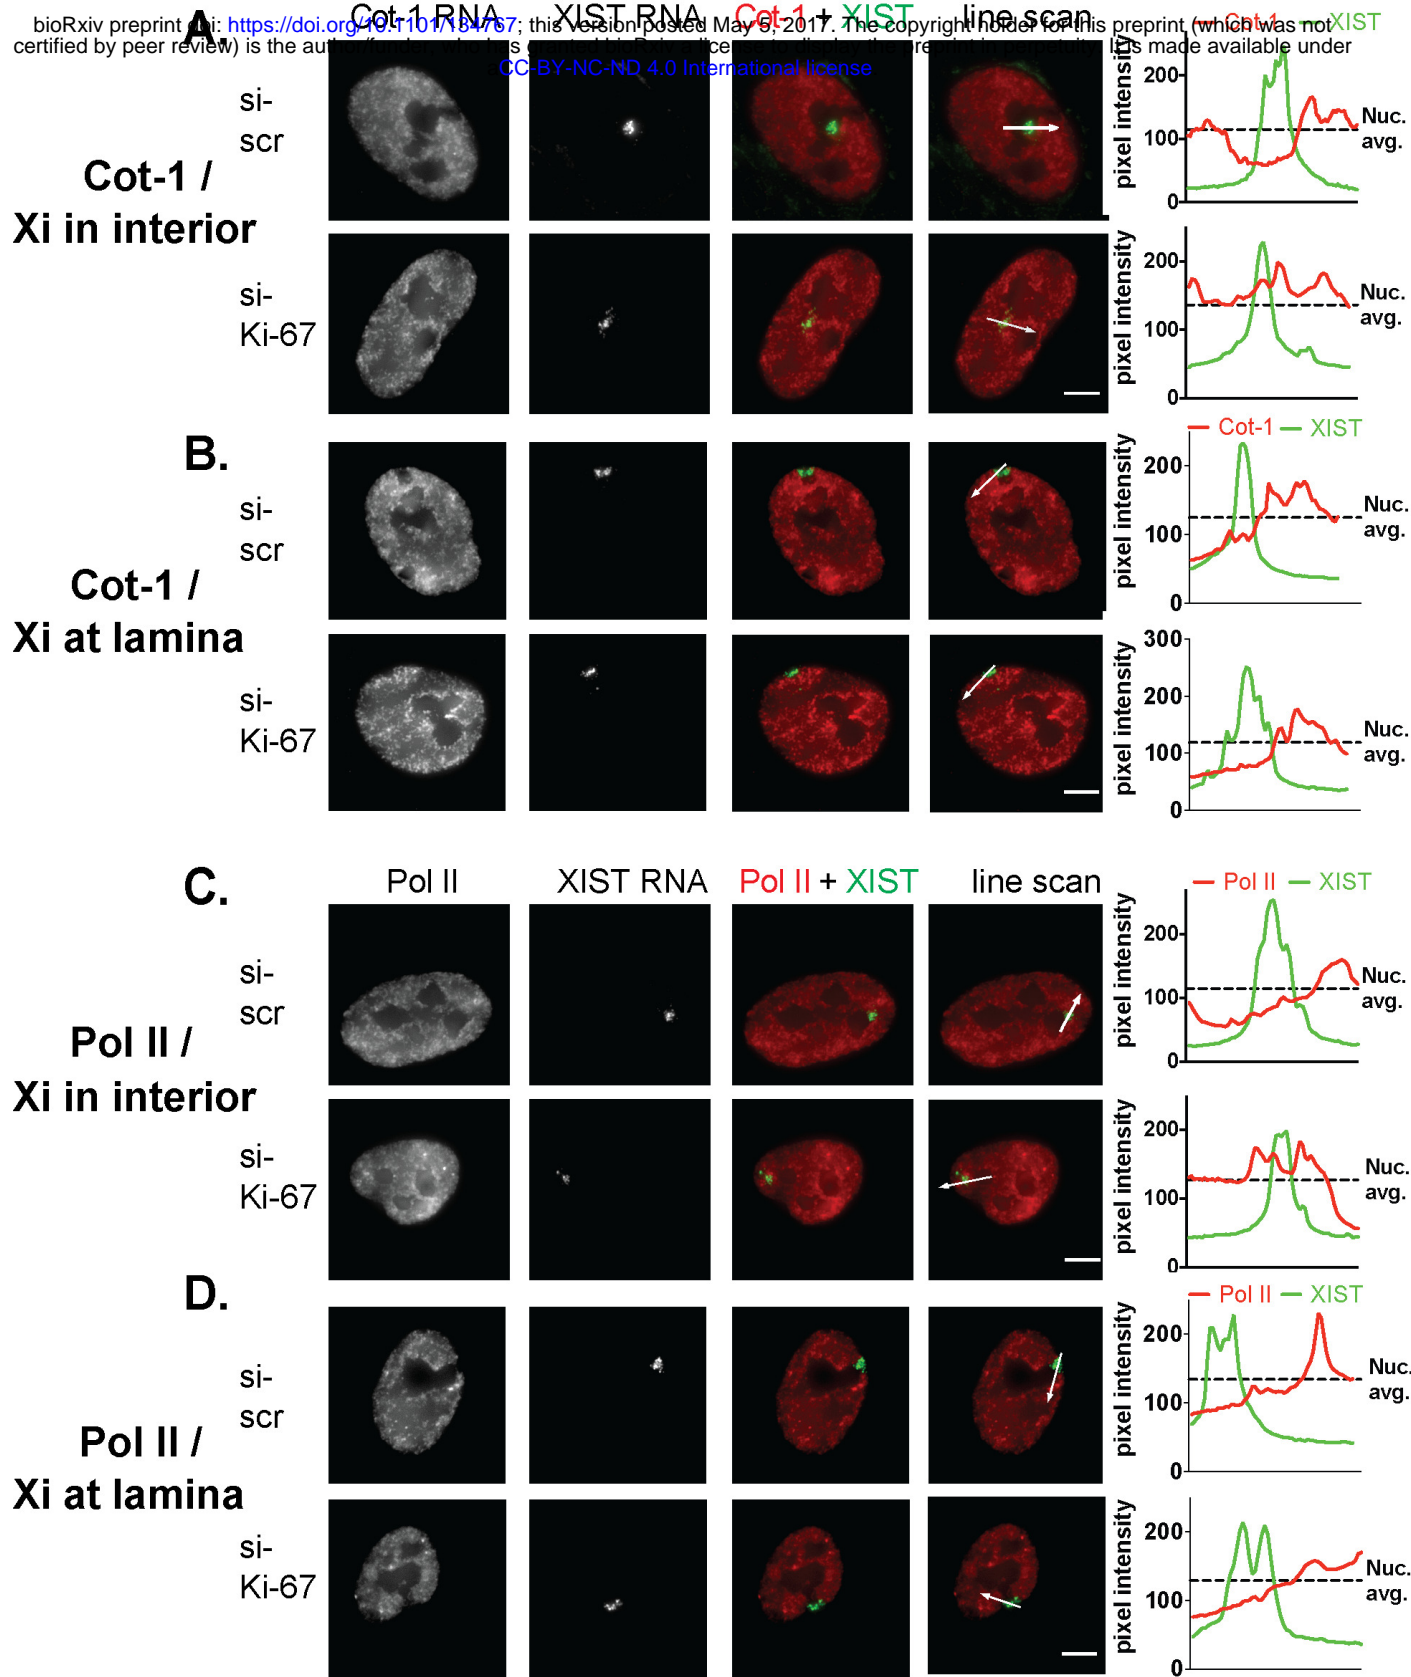

**E. presence of Cot-1 RNA at XIST domain**

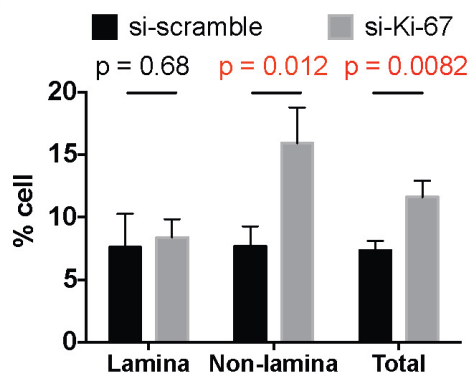

**F. presence of Pol II at XIST domain**

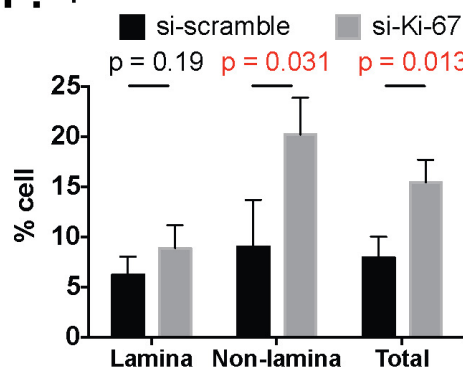

**G. si-scr si-Ki-67**

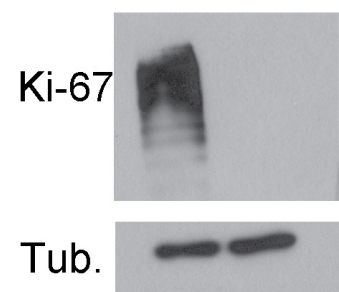

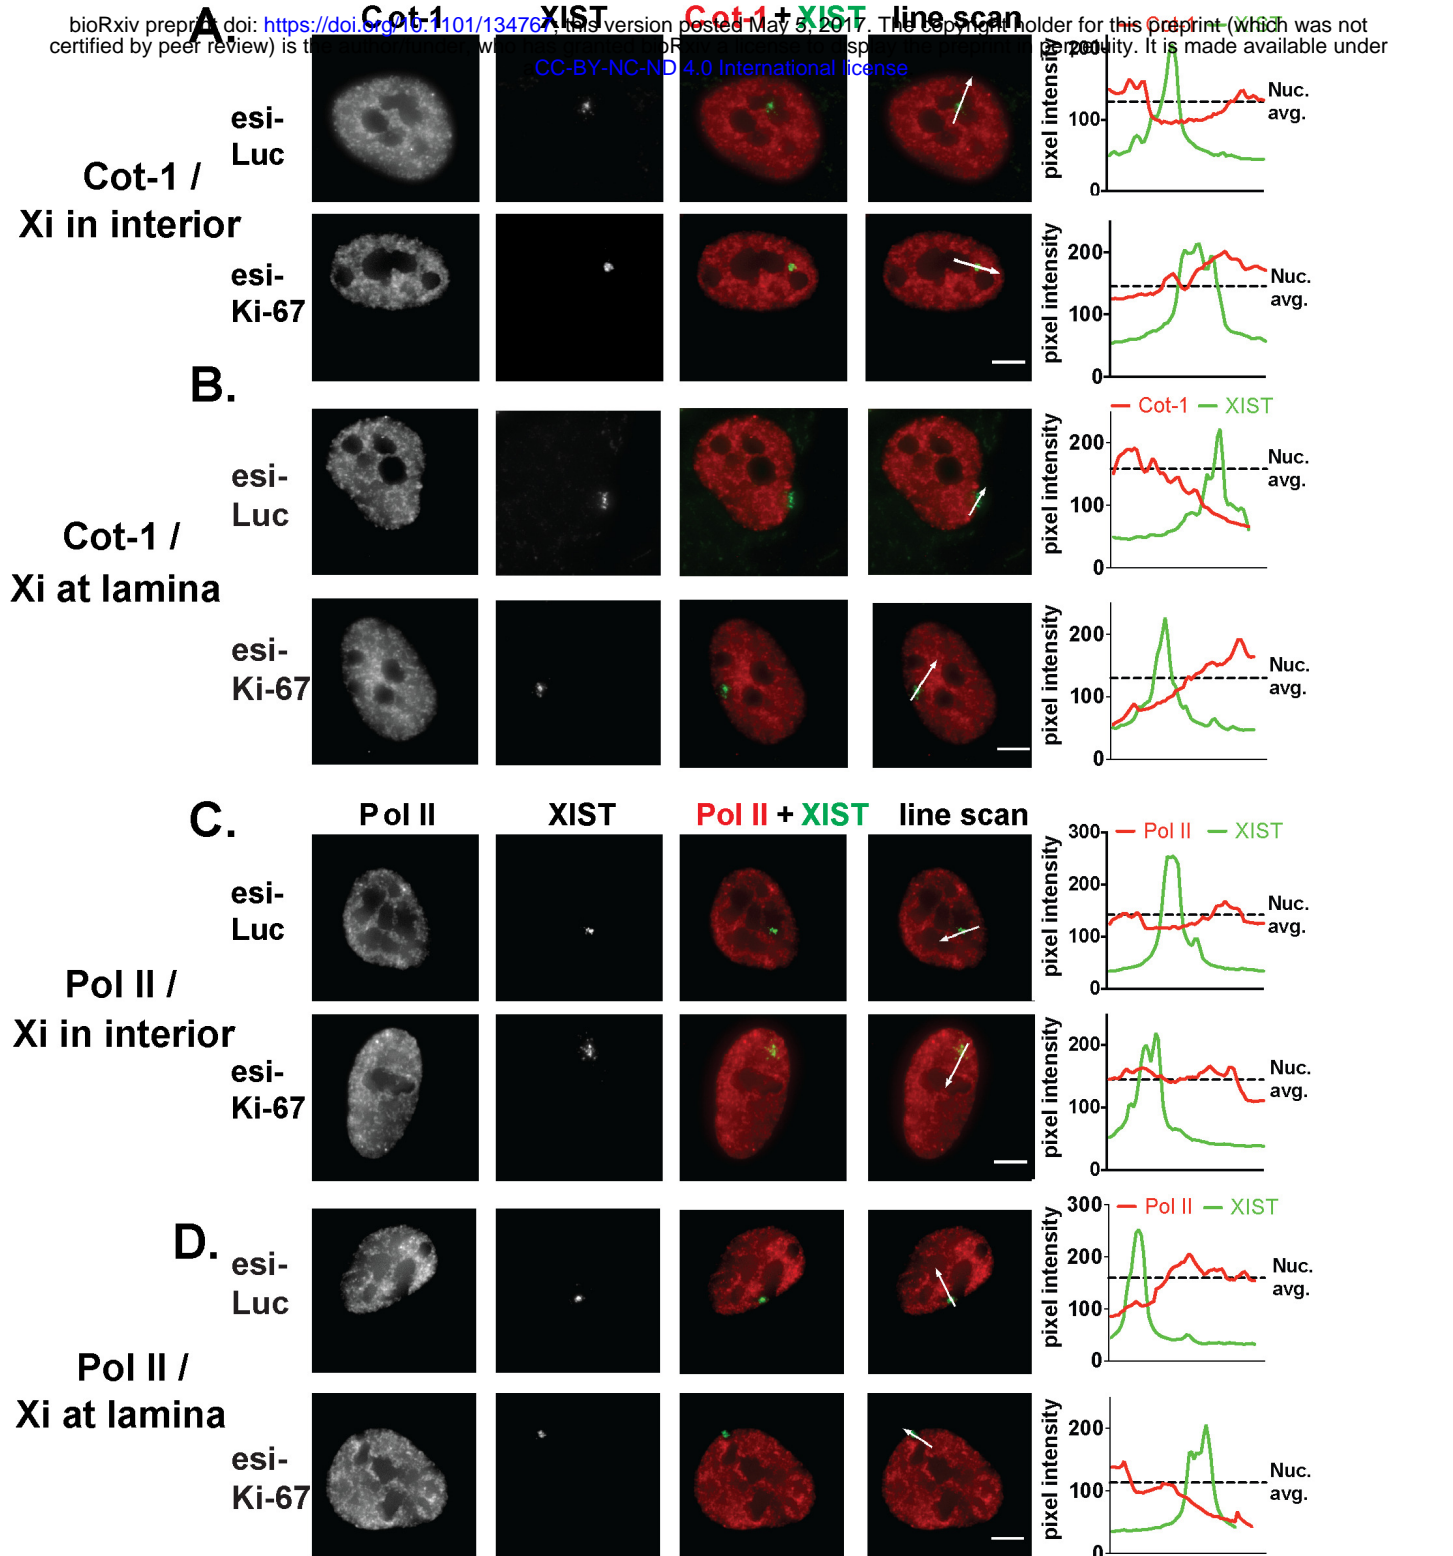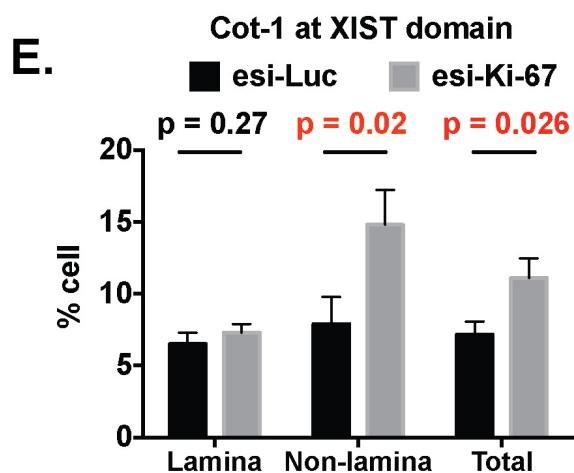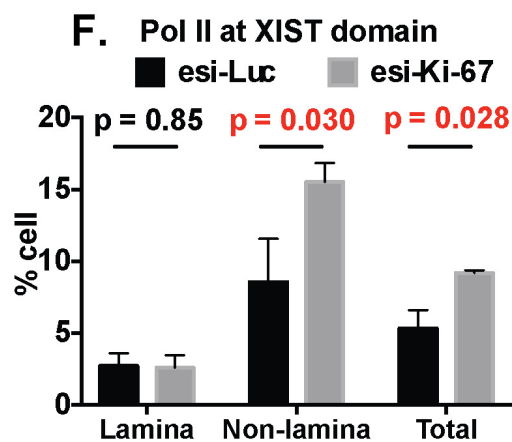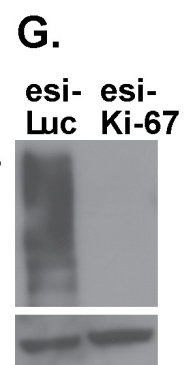

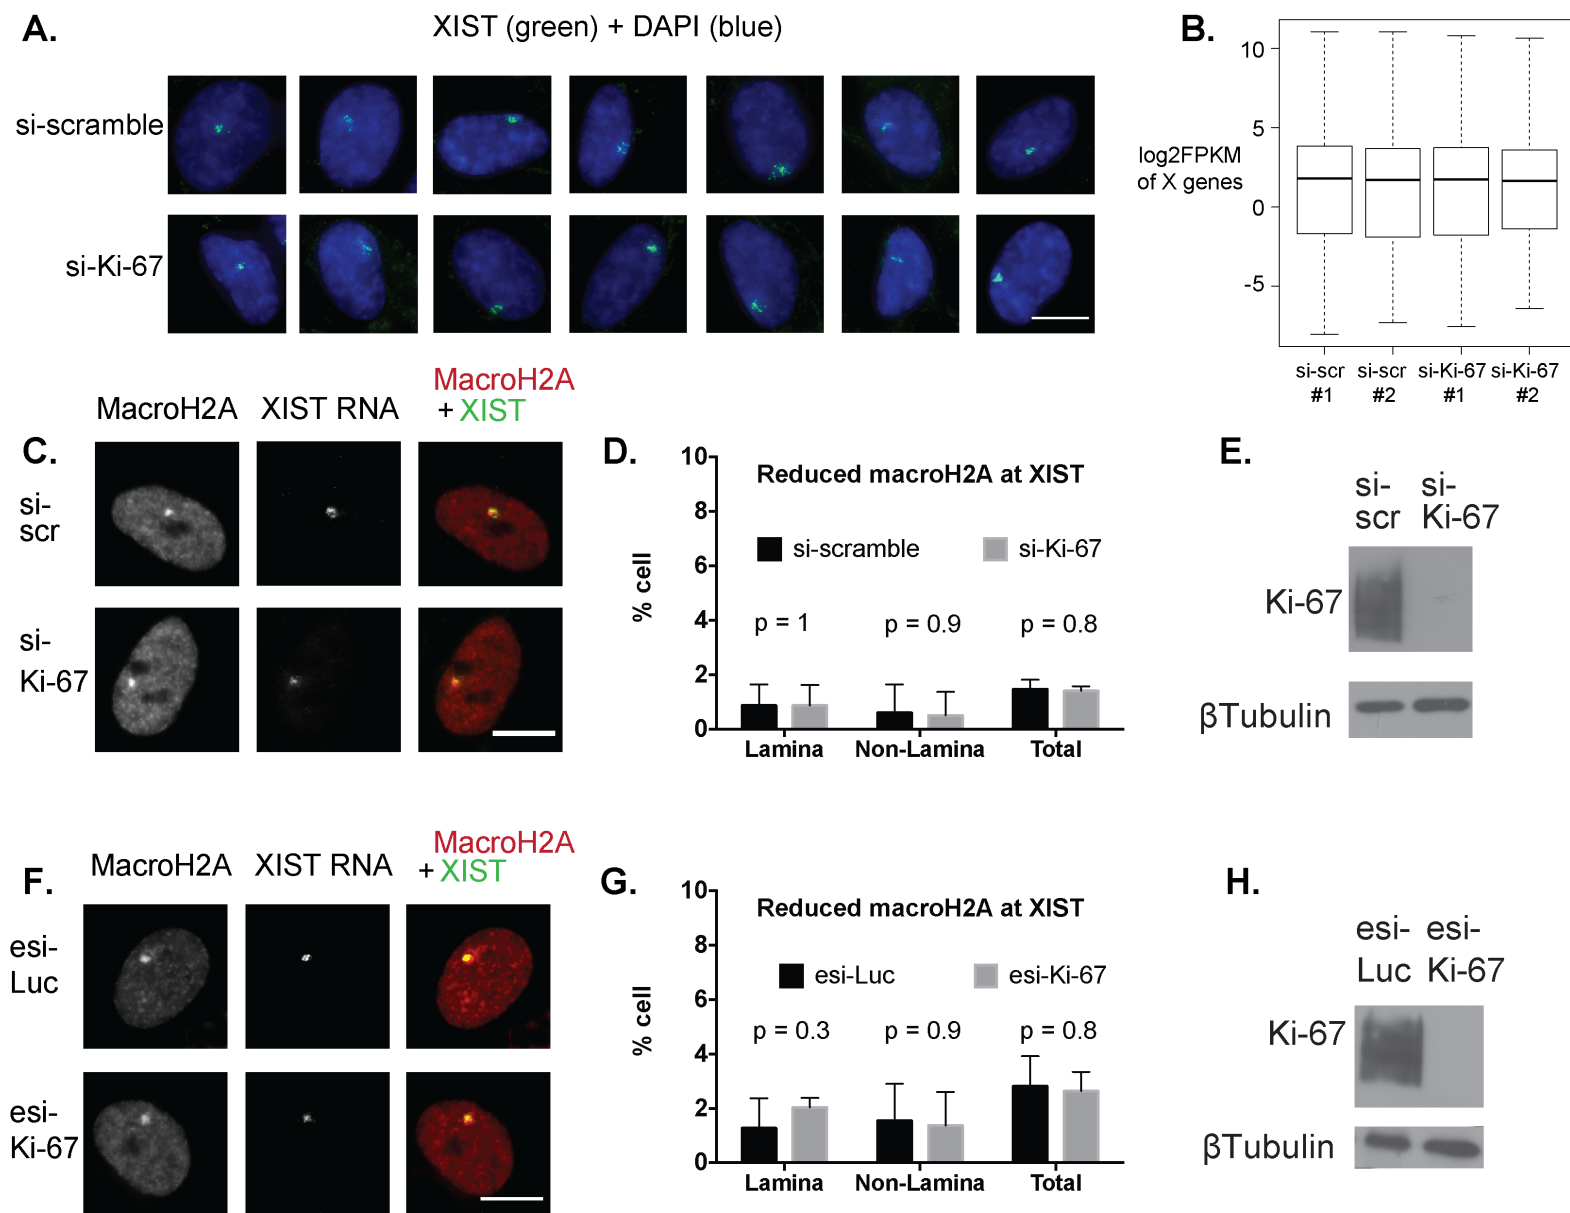

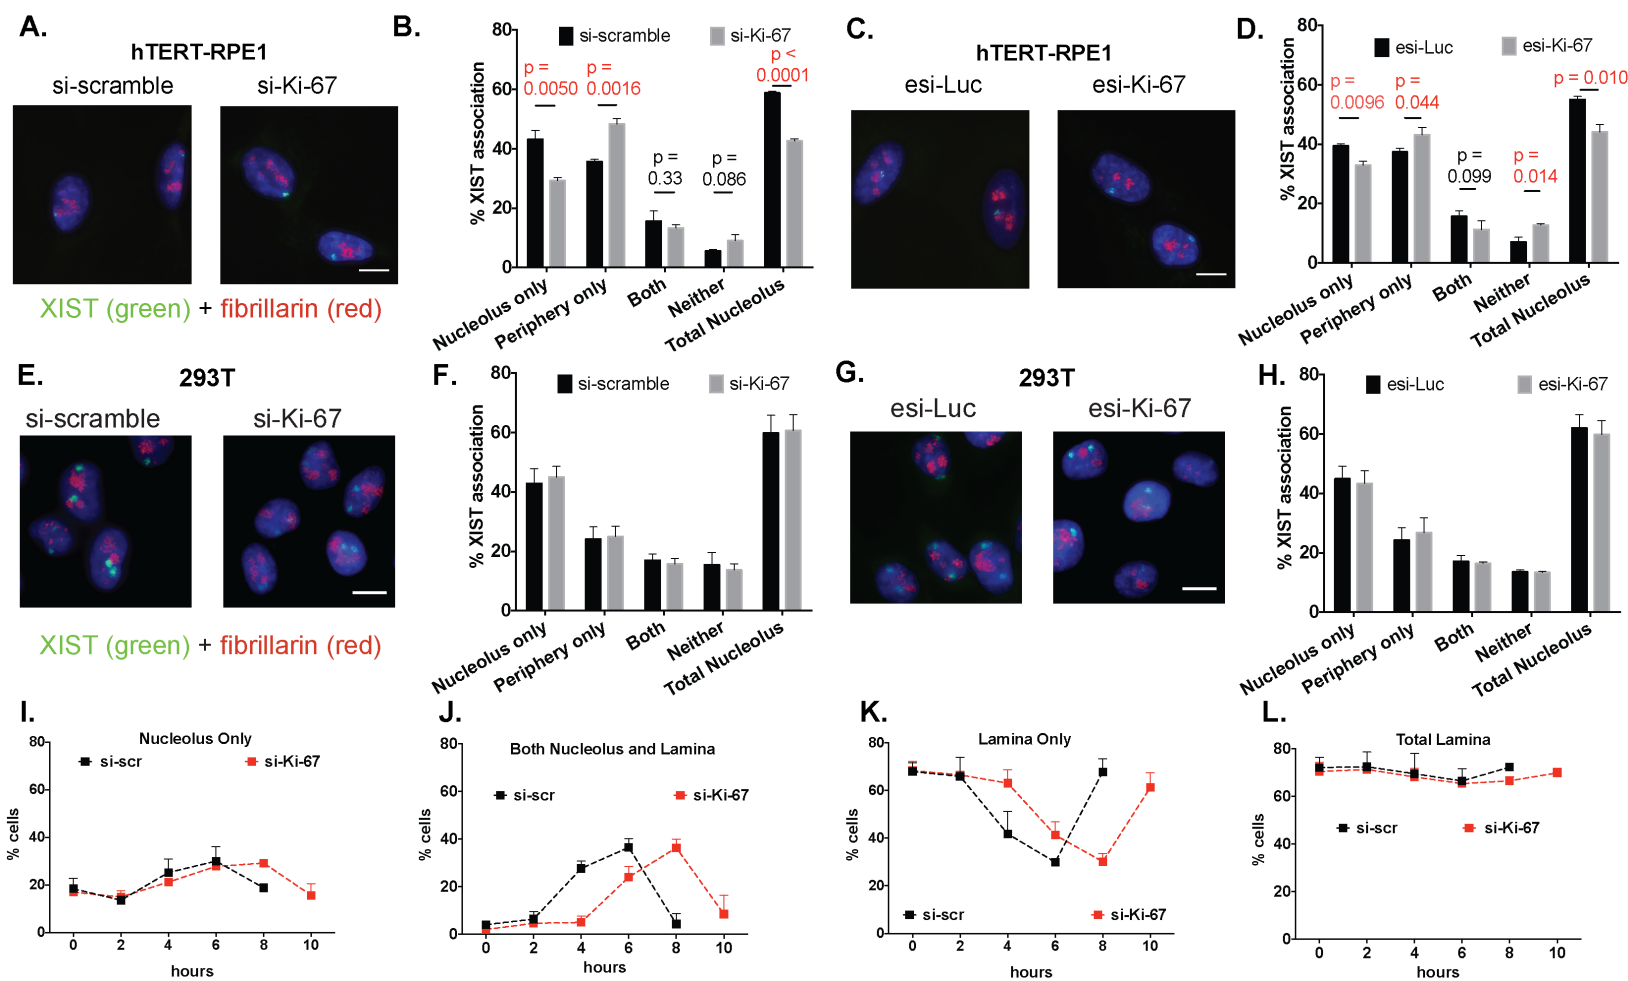

Source: http://www.biorxiv.org/content/10.1101/134767v1.full.pdf
